# Supplementary material for: Elevated levels of the methyltransferase SETD2 causes transcription and alternative splicing changes resulting in oncogenic phenotypes
Source: Frontiers journal article supplement (doi:10.3389/fcell.2022.945668), 2022-08-10
Supplement: Data_Sheet_1.ZIP [file Data_Sheet_1.ZIP]

## Sheet: SETD2FLvsKO
Supplementary Data 1. RNA-seq Differential Expression Analysis Report for SETD2 knockout cells expressing SETD2 FL
GeneID	GeneName	BioType	log2FoldChange	FoldChange	FoldChangeShow	log2CPM	FDR	Class
ENSG00000186115	CYP4F2	protein_coding	5.175	36.122	10	-0.919923	3.9508e-05	Up
ENSG00000181555	SETD2	protein_coding	5.065	33.48	10	11.2326	2.3893e-19	Up
ENSG00000138347	MYPN	protein_coding	3.942	15.372	10	0.882863	5.8061e-8	Up
ENSG00000173110	HSPA6	protein_coding	3.581	11.966	10	2.47532	0.00013798	Up
ENSG00000095585	BLNK	protein_coding	3.564	11.824	10	-1.35083	0.0038069	Up
ENSG00000104783	KCNN4	protein_coding	3.244	9.476	9.476	-0.556801	7.5628e-05	Up
ENSG00000186529	CYP4F3	protein_coding	3.22	9.321	9.321	-0.629107	6.2566e-05	Up
ENSG00000187775	DNAH17	protein_coding	3.169	8.997	8.997	1.44988	3.4871e-9	Up
ENSG00000141579	ZNF750	protein_coding	2.952	7.736	7.736	-1.18716	0.00067676	Up
ENSG00000162511	LAPTM5	protein_coding	2.902	7.476	7.476	-0.997932	0.0028787	Up
ENSG00000239713	APOBEC3G	protein_coding	2.854	7.228	7.228	-1.33204	0.033074	Up
ENSG00000132274	TRIM22	protein_coding	2.85	7.21	7.21	-0.819686	0.0077458	Up
ENSG00000169896	ITGAM	protein_coding	2.789	6.912	6.912	-1.26628	0.029584	Up
ENSG00000144452	ABCA12	protein_coding	2.763	6.787	6.787	-0.517359	0.00051991	Up
ENSG00000170324	FRMPD2	protein_coding	2.751	6.73	6.73	-0.971161	0.00053613	Up
ENSG00000198753	PLXNB3	protein_coding	2.685	6.43	6.43	-1.06691	0.012803	Up
ENSG00000171649	ZIK1	protein_coding	2.669	6.36	6.36	-1.23329	0.02299	Up
ENSG00000205592	MUC19	protein_coding	2.468	5.532	5.532	-0.369804	0.00056141	Up
ENSG00000163803	PLB1	protein_coding	2.463	5.513	5.513	-0.565389	0.0057409	Up
ENSG00000128342	LIF	protein_coding	2.35	5.097	5.097	1.90502	6.56e-8	Up
ENSG00000175592	FOSL1	protein_coding	2.129	4.375	4.375	-0.18787	0.0022595	Up
ENSG00000130513	GDF15	protein_coding	2.11	4.318	4.318	2.94708	3.4871e-9	Up
ENSG00000237512	UNC5B-AS1	lncRNA	2.11	4.316	4.316	-1.11064	0.024534	Up
ENSG00000180525	PRR26	protein_coding	2.103	4.297	4.297	-1.0388	0.031372	Up
ENSG00000232650	LINC01780	lncRNA	2.084	4.239	4.239	-1.18667	0.011416	Up
ENSG00000186517	ARHGAP30	protein_coding	2.074	4.212	4.212	-0.944293	0.011087	Up
ENSG00000110195	FOLR1	protein_coding	2.02	4.055	4.055	-0.0409217	0.009222	Up
ENSG00000251131	AC025171.3	lncRNA	2.007	4.02	4.02	0.53885	6.2566e-05	Up
ENSG00000143318	CASQ1	protein_coding	2.001	4.002	4.002	-0.807553	0.032414	Up
ENSG00000165092	ALDH1A1	protein_coding	1.958	3.886	3.886	0.296805	0.0031855	Up
ENSG00000128242	GAL3ST1	protein_coding	1.908	3.754	3.754	0.723022	0.00031886	Up
ENSG00000103522	IL21R	protein_coding	1.878	3.675	3.675	-0.931736	0.0077458	Up
ENSG00000149573	MPZL2	protein_coding	1.865	3.643	3.643	-0.29126	0.0032449	Up
ENSG00000143217	NECTIN4	protein_coding	1.839	3.577	3.577	1.6431	3.2413e-05	Up
ENSG00000168918	INPP5D	protein_coding	1.817	3.524	3.524	2.36542	6.56e-8	Up
ENSG00000245025	AC107959.1	lncRNA	1.806	3.498	3.498	-1.17105	0.015894	Up
ENSG00000164867	NOS3	protein_coding	1.793	3.466	3.466	-1.24953	0.031372	Up
ENSG00000168386	FILIP1L	protein_coding	1.78	3.434	3.434	-0.233816	0.0061988	Up
ENSG00000015520	NPC1L1	protein_coding	1.711	3.274	3.274	0.262281	0.00099141	Up
ENSG00000205336	ADGRG1	protein_coding	1.701	3.251	3.251	-0.616512	0.049158	Up
ENSG00000139988	RDH12	protein_coding	1.695	3.239	3.239	-0.250868	0.017116	Up
ENSG00000176840	MIR7-3HG	lncRNA	1.648	3.134	3.134	-1.09619	0.035707	Up
ENSG00000118898	PPL	protein_coding	1.646	3.13	3.13	0.311544	0.002619	Up
ENSG00000146006	LRRTM2	protein_coding	1.603	3.038	3.038	0.00127072	0.0024868	Up
ENSG00000172752	COL6A5	protein_coding	1.602	3.035	3.035	0.0412649	0.028605	Up
ENSG00000184584	TMEM173	protein_coding	1.594	3.02	3.02	1.44958	6.2566e-05	Up
ENSG00000139329	LUM	protein_coding	1.575	2.978	2.978	0.149289	0.012378	Up
ENSG00000240219	AL512306.2	lncRNA	1.546	2.919	2.919	-0.879632	0.0224	Up
ENSG00000244694	PTCHD4	protein_coding	1.534	2.896	2.896	-0.242217	0.0047902	Up
ENSG00000089101	CFAP61	protein_coding	1.533	2.893	2.893	-0.702461	0.034355	Up
ENSG00000251095	AC097478.1	lncRNA	1.531	2.889	2.889	1.31947	7.845e-05	Up
ENSG00000171236	LRG1	protein_coding	1.523	2.874	2.874	-0.957393	0.035707	Up
ENSG00000169403	PTAFR	protein_coding	1.453	2.738	2.738	-0.133773	0.0094745	Up
ENSG00000196735	HLA-DQA1	protein_coding	1.452	2.735	2.735	-0.725567	0.026561	Up
ENSG00000163701	IL17RE	protein_coding	1.425	2.686	2.686	-0.819122	0.037974	Up
ENSG00000158055	GRHL3	protein_coding	1.422	2.68	2.68	0.261336	0.0040667	Up
ENSG00000143171	RXRG	protein_coding	1.418	2.672	2.672	0.559575	0.0072751	Up
ENSG00000185869	ZNF829	protein_coding	1.416	2.668	2.668	0.497345	0.0058988	Up
ENSG00000140835	CHST4	protein_coding	1.398	2.636	2.636	-0.830833	0.030421	Up
ENSG00000113140	SPARC	protein_coding	1.396	2.632	2.632	1.89349	0.0014333	Up
ENSG00000103089	FA2H	protein_coding	1.394	2.628	2.628	-0.648126	0.043474	Up
ENSG00000175262	C1orf127	protein_coding	1.394	2.628	2.628	-0.747361	0.04921	Up
ENSG00000132639	SNAP25	protein_coding	1.394	2.628	2.628	-1.21713	0.049859	Up
ENSG00000014257	ACPP	protein_coding	1.382	2.605	2.605	1.14471	0.0054693	Up
ENSG00000196878	LAMB3	protein_coding	1.382	2.607	2.607	1.01554	0.011241	Up
ENSG00000249306	LINC01411	lncRNA	1.371	2.586	2.586	1.94867	0.00064489	Up
ENSG00000265107	GJA5	protein_coding	1.367	2.58	2.58	-1.09615	0.03789	Up
ENSG00000215246	AC116351.1	lncRNA	1.358	2.564	2.564	-0.201401	0.018982	Up
ENSG00000175793	SFN	protein_coding	1.352	2.552	2.552	0.00210516	0.011416	Up
ENSG00000171786	NHLH1	protein_coding	1.297	2.457	2.457	-0.332802	0.027395	Up
ENSG00000115129	TP53I3	protein_coding	1.295	2.455	2.455	1.9591	4.2108e-05	Up
ENSG00000196754	S100A2	protein_coding	1.295	2.454	2.454	0.0356562	0.030927	Up
ENSG00000137440	FGFBP1	protein_coding	1.289	2.443	2.443	1.09081	0.0038069	Up
ENSG00000139567	ACVRL1	protein_coding	1.285	2.437	2.437	0.781267	0.01892	Up
ENSG00000138798	EGF	protein_coding	1.26	2.395	2.395	1.21423	0.0077458	Up
ENSG00000159409	CELF3	protein_coding	1.259	2.393	2.393	-0.307487	0.030111	Up
ENSG00000198203	SULT1C2	protein_coding	1.258	2.392	2.392	0.0363883	0.023407	Up
ENSG00000240137	ERICH6-AS1	lncRNA	1.258	2.392	2.392	-0.178997	0.026077	Up
ENSG00000233695	GAS6-AS1	lncRNA	1.25	2.379	2.379	-0.00358519	0.02668	Up
ENSG00000148677	ANKRD1	protein_coding	1.248	2.375	2.375	1.37331	0.0016288	Up
ENSG00000136235	GPNMB	protein_coding	1.246	2.371	2.371	0.393636	0.032655	Up
ENSG00000104112	SCG3	protein_coding	1.244	2.369	2.369	-0.0817072	0.029459	Up
ENSG00000196152	ZNF79	protein_coding	1.214	2.32	2.32	2.59354	1.3741e-05	Up
ENSG00000166960	CCDC178	protein_coding	1.212	2.316	2.316	-0.403312	0.030574	Up
ENSG00000158859	ADAMTS4	protein_coding	1.207	2.308	2.308	-0.225344	0.034171	Up
ENSG00000143632	ACTA1	protein_coding	1.204	2.304	2.304	-0.265656	0.032655	Up
ENSG00000274750	HIST1H3E	protein_coding	1.176	2.259	2.259	0.463931	0.010232	Up
ENSG00000139269	INHBE	protein_coding	1.162	2.238	2.238	0.125557	0.011914	Up
ENSG00000166961	MS4A15	protein_coding	1.161	2.236	2.236	-0.565873	0.042446	Up
ENSG00000134917	ADAMTS8	protein_coding	1.147	2.215	2.215	-0.00574204	0.027435	Up
ENSG00000155495	MAGEC1	protein_coding	1.139	2.202	2.202	0.268176	0.049671	Up
ENSG00000099260	PALMD	protein_coding	1.127	2.184	2.184	0.0689495	0.039552	Up
ENSG00000244649	LINC02086	lncRNA	1.125	2.181	2.181	0.349604	0.015529	Up
ENSG00000228549	BX284668.2	lncRNA	1.117	2.169	2.169	-0.290617	0.044916	Up
ENSG00000232677	LINC00665	lncRNA	1.112	2.161	2.161	1.65494	0.0057586	Up
ENSG00000100604	CHGA	protein_coding	1.1	2.143	2.143	0.568675	0.032655	Up
ENSG00000198774	RASSF9	protein_coding	1.097	2.14	2.14	0.0217406	0.031741	Up
ENSG00000152439	ZNF773	protein_coding	1.087	2.124	2.124	1.03632	0.0083959	Up
ENSG00000187621	TCL6	lncRNA	1.077	2.11	2.11	-0.359027	0.049035	Up
ENSG00000277149	TYW1B	protein_coding	1.065	2.092	2.092	1.67149	0.00094398	Up
ENSG00000162576	MXRA8	protein_coding	1.059	2.084	2.084	0.454045	0.014727	Up
ENSG00000130844	ZNF331	protein_coding	1.05	2.07	2.07	1.90841	0.021539	Up
ENSG00000197106	SLC6A17	protein_coding	1.046	2.065	2.065	0.0554506	0.033783	Up
ENSG00000167676	PLIN4	protein_coding	1.036	2.05	2.05	0.340842	0.02635	Up
ENSG00000198538	ZNF28	protein_coding	1.019	2.027	2.027	0.950157	0.011416	Up
ENSG00000245680	ZNF585B	protein_coding	1.017	2.023	2.023	1.83151	0.0020477	Up
ENSG00000198502	HLA-DRB5	protein_coding	1.016	2.022	2.022	1.96894	0.003175	Up
ENSG00000029534	ANK1	protein_coding	1.014	2.019	2.019	0.443876	0.015603	Up
ENSG00000162643	WDR63	protein_coding	1.012	2.017	2.017	2.11868	0.00023956	Up
ENSG00000183018	AC118754.1	protein_coding	1.011	2.015	2.015	0.229508	0.043074	Up
ENSG00000228830	AL160408.2	lncRNA	-1.021	2.029	2.029	-0.207346	0.029459	Down
ENSG00000270641	TSIX	lncRNA	-1.081	2.115	2.115	6.42909	1.4491e-06	Down
ENSG00000219410	AC125494.1	lncRNA	-1.106	2.153	2.153	-0.615242	0.037007	Down
ENSG00000236498	AC107081.2	lncRNA	-1.131	2.189	2.189	0.496031	0.010368	Down
ENSG00000217702	AC073263.1	lncRNA	-1.146	2.213	2.213	-0.41041	0.034279	Down
ENSG00000250790	AC127070.2	lncRNA	-1.227	2.34	2.34	-0.34776	0.044508	Down
ENSG00000177182	CLVS1	protein_coding	-1.237	2.357	2.357	-0.657822	0.030984	Down
ENSG00000263986	AC087393.2	lncRNA	-1.316	2.49	2.49	-1.00937	0.029551	Down
ENSG00000228302	AL512770.1	lncRNA	-1.317	2.491	2.491	-0.553613	0.016907	Down
ENSG00000261604	AC114947.2	lncRNA	-1.337	2.526	2.526	-0.271716	0.0069633	Down
ENSG00000256364	AC069234.2	lncRNA	-1.398	2.635	2.635	-1.09463	0.031526	Down
ENSG00000237343	AC246785.3	lncRNA	-1.579	2.987	2.987	-0.614955	0.015132	Down
ENSG00000273489	AC008264.2	lncRNA	-1.588	3.006	3.006	-1.05147	0.018766	Down
ENSG00000260633	AC010207.1	lncRNA	-1.87	3.656	3.656	-1.00928	0.022975	Down

## Sheet: SETD2CvsKO
Supplementary Data 1. RNA-seq Differential Expression Analysis Report for SETD2 knockout cells expressing SETD2 C
GeneID	GeneName	BioType	log2FoldChange	FoldChange	FoldChangeShow	log2CPM	FDR	Class
ENSG00000258667	HIF1A-AS2	lncRNA	6.476	89.038	10	-0.66928	5.5715e-8	Up
ENSG00000181555	SETD2	protein_coding	5.835	57.102	10	11.2326	3.1852e-20	Up
ENSG00000173110	HSPA6	protein_coding	5.482	44.691	10	2.47532	7.4611e-10	Up
ENSG00000196081	ZNF724	protein_coding	4.994	31.877	10	-1.70251	1.5234e-05	Up
ENSG00000205922	ONECUT3	protein_coding	4.962	31.168	10	-1.77033	1.8426e-05	Up
ENSG00000125675	GRIA3	protein_coding	4.562	23.625	10	-1.53472	6.6406e-06	Up
ENSG00000239713	APOBEC3G	protein_coding	4.486	22.409	10	-1.33204	6.7274e-06	Up
ENSG00000138356	AOX1	protein_coding	4.338	20.221	10	-1.65829	1.0347e-05	Up
ENSG00000286085	AL109653.3	lncRNA	4.115	17.332	10	-0.466734	1.9245e-7	Up
ENSG00000154016	GRAP	protein_coding	4.045	16.511	10	-1.09528	1.8877e-06	Up
ENSG00000171649	ZIK1	protein_coding	3.947	15.426	10	-1.23329	9.8569e-06	Up
ENSG00000262406	MMP12	protein_coding	3.863	14.555	10	-0.736403	3.98e-7	Up
ENSG00000120708	TGFBI	protein_coding	3.835	14.271	10	-1.59529	0.00026219	Up
ENSG00000169896	ITGAM	protein_coding	3.828	14.202	10	-1.26628	6.0708e-05	Up
ENSG00000235529	AGAP1-IT1	lncRNA	3.814	14.067	10	-0.930705	2.3047e-06	Up
ENSG00000179046	TRIML2	protein_coding	3.77	13.645	10	-1.36637	7.6205e-06	Up
ENSG00000235052	AL021154.1	lncRNA	3.739	13.35	10	-0.917981	6.3729e-06	Up
ENSG00000175832	ETV4	protein_coding	3.669	12.717	10	-1.06559	9.0587e-06	Up
ENSG00000128422	KRT17	protein_coding	3.619	12.283	10	-0.78251	5.6391e-06	Up
ENSG00000186352	ANKRD37	protein_coding	3.618	12.277	10	5.41566	9.696e-16	Up
ENSG00000188643	S100A16	protein_coding	3.596	12.088	10	-1.02448	5.1428e-06	Up
ENSG00000138615	CILP	protein_coding	3.594	12.074	10	-0.830881	1.806e-05	Up
ENSG00000163286	ALPG	protein_coding	3.58	11.963	10	-1.05226	2.7535e-06	Up
ENSG00000142623	PADI1	protein_coding	3.568	11.861	10	-1.68053	0.00011045	Up
ENSG00000182916	TCEAL7	protein_coding	3.537	11.611	10	0.918028	1.0181e-9	Up
ENSG00000251127	AC091173.1	lncRNA	3.531	11.561	10	-1.31486	5.1836e-06	Up
ENSG00000169067	ACTBL2	protein_coding	3.527	11.529	10	-1.59548	2.7395e-05	Up
ENSG00000084636	COL16A1	protein_coding	3.494	11.268	10	-0.27322	2.9039e-7	Up
ENSG00000284632	AL354702.2	lncRNA	3.467	11.06	10	-1.57535	5.7675e-05	Up
ENSG00000275055	AC011468.5	lncRNA	3.413	10.655	10	-0.746572	7.6149e-06	Up
ENSG00000166670	MMP10	protein_coding	3.381	10.419	10	-1.99651	0.00011864	Up
ENSG00000260922	AC009139.1	lncRNA	3.376	10.385	10	-0.957541	3.0676e-05	Up
ENSG00000196878	LAMB3	protein_coding	3.365	10.302	10	1.01554	1.5315e-9	Up
ENSG00000137745	MMP13	protein_coding	3.356	10.238	10	-0.702483	2.4724e-06	Up
ENSG00000205336	ADGRG1	protein_coding	3.354	10.228	10	-0.616512	1.7194e-06	Up
ENSG00000137841	PLCB2	protein_coding	3.325	10.024	10	-1.33335	8.4413e-05	Up
ENSG00000224418	STK24-AS1	lncRNA	3.32	9.986	9.986	-1.57499	4.7953e-05	Up
ENSG00000275216	AL161431.1	lncRNA	3.301	9.858	9.858	-0.208343	1.4215e-7	Up
ENSG00000135245	HILPDA	protein_coding	3.26	9.582	9.582	7.88227	9.696e-16	Up
ENSG00000279765	AC013394.1	protein_coding	3.254	9.541	9.541	-0.573392	4.0568e-06	Up
ENSG00000165092	ALDH1A1	protein_coding	3.248	9.501	9.501	0.296805	6.4926e-8	Up
ENSG00000249306	LINC01411	lncRNA	3.245	9.48	9.48	1.94867	1.3754e-11	Up
ENSG00000164849	GPR146	protein_coding	3.18	9.062	9.062	0.951313	3.1509e-9	Up
ENSG00000100385	IL2RB	protein_coding	3.161	8.946	8.946	-1.05232	3.7132e-05	Up
ENSG00000196263	ZNF471	protein_coding	3.157	8.918	8.918	0.783454	5.1882e-9	Up
ENSG00000187800	PEAR1	protein_coding	3.141	8.822	8.822	-1.09465	6.9278e-05	Up
ENSG00000172752	COL6A5	protein_coding	3.115	8.665	8.665	0.0412649	6.3348e-7	Up
ENSG00000107159	CA9	protein_coding	3.106	8.609	8.609	-1.65864	4.9311e-05	Up
ENSG00000133805	AMPD3	protein_coding	3.082	8.466	8.466	0.761642	8.7972e-8	Up
ENSG00000148926	ADM	protein_coding	3.081	8.462	8.462	3.796	1.2656e-14	Up
ENSG00000180525	PRR26	protein_coding	3.08	8.458	8.458	-1.0388	4.4437e-05	Up
ENSG00000163803	PLB1	protein_coding	3.071	8.405	8.405	-0.565389	1.4675e-05	Up
ENSG00000140678	ITGAX	protein_coding	3.049	8.275	8.275	0.0881501	2.0568e-7	Up
ENSG00000196139	AKR1C3	protein_coding	3.049	8.279	8.279	-1.28247	8.8726e-05	Up
ENSG00000162511	LAPTM5	protein_coding	3.043	8.241	8.241	-0.997932	7.1297e-05	Up
ENSG00000130844	ZNF331	protein_coding	3.023	8.127	8.127	1.90841	1.2589e-9	Up
ENSG00000113140	SPARC	protein_coding	3.02	8.109	8.109	1.89349	3.1867e-10	Up
ENSG00000146674	IGFBP3	protein_coding	3.013	8.072	8.072	0.0376565	1.7151e-7	Up
ENSG00000088882	CPXM1	protein_coding	2.991	7.951	7.951	-1.63744	0.00020419	Up
ENSG00000162645	GBP2	protein_coding	2.99	7.946	7.946	0.759396	1.0978e-8	Up
ENSG00000230943	LINC02541	lncRNA	2.943	7.688	7.688	-1.51496	0.00033481	Up
ENSG00000110195	FOLR1	protein_coding	2.939	7.667	7.667	-0.0409217	4.1456e-06	Up
ENSG00000169429	CXCL8	protein_coding	2.918	7.556	7.556	-1.15505	1.4717e-05	Up
ENSG00000148204	CRB2	protein_coding	2.918	7.558	7.558	-1.40258	0.00012777	Up
ENSG00000223638	RFPL4A	protein_coding	2.916	7.547	7.547	-1.03864	3.704e-05	Up
ENSG00000233818	AP000695.2	lncRNA	2.912	7.524	7.524	-1.63754	0.00097272	Up
ENSG00000170345	FOS	protein_coding	2.909	7.512	7.512	3.24882	1.6194e-13	Up
ENSG00000136235	GPNMB	protein_coding	2.899	7.46	7.46	0.393636	9.4097e-8	Up
ENSG00000095585	BLNK	protein_coding	2.894	7.434	7.434	-1.35083	0.0030371	Up
ENSG00000143318	CASQ1	protein_coding	2.888	7.402	7.402	-0.807553	6.6589e-05	Up
ENSG00000203814	HIST2H2BF	protein_coding	2.887	7.399	7.399	0.663973	5.8808e-8	Up
ENSG00000248323	LUCAT1	lncRNA	2.882	7.371	7.371	-1.61654	0.00018378	Up
ENSG00000019186	CYP24A1	protein_coding	2.879	7.358	7.358	-0.449461	3.1301e-06	Up
ENSG00000153253	SCN3A	protein_coding	2.87	7.309	7.309	-0.794062	8.2139e-06	Up
ENSG00000179674	ARL14	protein_coding	2.859	7.257	7.257	-0.401956	1.4438e-06	Up
ENSG00000184719	RNLS	protein_coding	2.852	7.218	7.218	-1.61623	0.0001407	Up
ENSG00000253633	AP002852.1	lncRNA	2.85	7.212	7.212	-0.700579	4.2975e-06	Up
ENSG00000136099	PCDH8	protein_coding	2.826	7.091	7.091	0.0495157	2.4959e-7	Up
ENSG00000255314	AC024475.4	lncRNA	2.821	7.067	7.067	-0.615684	3.45e-06	Up
ENSG00000160886	LY6K	protein_coding	2.821	7.069	7.069	-0.103131	5.4707e-7	Up
ENSG00000006606	CCL26	protein_coding	2.805	6.99	6.99	-1.13852	4.0521e-05	Up
ENSG00000109846	CRYAB	protein_coding	2.801	6.97	6.97	-0.780198	4.4432e-05	Up
ENSG00000073146	MOV10L1	protein_coding	2.791	6.923	6.923	-1.31573	0.00022602	Up
ENSG00000136999	CCN3	protein_coding	2.773	6.837	6.837	0.302361	2.2812e-7	Up
ENSG00000233056	ERVH48-1	lncRNA	2.772	6.833	6.833	-0.43788	3.1336e-06	Up
ENSG00000183979	NPB	protein_coding	2.768	6.812	6.812	0.0430995	4.7001e-7	Up
ENSG00000276600	RAB7B	protein_coding	2.767	6.808	6.808	-1.77031	0.00038721	Up
ENSG00000095932	SMIM24	protein_coding	2.756	6.755	6.755	0.0364705	4.911e-7	Up
ENSG00000153303	FRMD1	protein_coding	2.744	6.7	6.7	2.12596	6.2733e-10	Up
ENSG00000133665	DYDC2	protein_coding	2.73	6.635	6.635	-1.61586	0.00013775	Up
ENSG00000122367	LDB3	protein_coding	2.726	6.615	6.615	-1.40324	0.0001615	Up
ENSG00000134443	GRP	protein_coding	2.726	6.617	6.617	-1.68022	0.0003483	Up
ENSG00000166793	YPEL4	protein_coding	2.72	6.59	6.59	0.98653	2.1946e-8	Up
ENSG00000163898	LIPH	protein_coding	2.717	6.575	6.575	-0.595627	6.2127e-06	Up
ENSG00000111674	ENO2	protein_coding	2.706	6.526	6.526	5.89827	2.4448e-16	Up
ENSG00000145934	TENM2	protein_coding	2.704	6.518	6.518	-1.26525	4.9949e-05	Up
ENSG00000231473	RB1-DT	lncRNA	2.701	6.503	6.503	-1.61546	0.00052217	Up
ENSG00000140481	CCDC33	protein_coding	2.7	6.498	6.498	-0.374158	3.6189e-06	Up
ENSG00000185168	LINC00482	lncRNA	2.693	6.467	6.467	-1.65876	0.00032627	Up
ENSG00000173262	SLC2A14	protein_coding	2.684	6.425	6.425	1.26558	2.3594e-9	Up
ENSG00000138395	CDK15	protein_coding	2.684	6.425	6.425	-0.637339	6.3418e-06	Up
ENSG00000060566	CREB3L3	protein_coding	2.68	6.409	6.409	-1.13996	0.00028387	Up
ENSG00000174343	CHRNA9	protein_coding	2.678	6.401	6.401	-1.18578	4.4677e-05	Up
ENSG00000132718	SYT11	protein_coding	2.663	6.334	6.334	0.878417	1.2265e-8	Up
ENSG00000258947	TUBB3	protein_coding	2.662	6.329	6.329	-0.505694	5.811e-06	Up
ENSG00000165182	CXorf58	protein_coding	2.645	6.254	6.254	-1.89161	0.00048491	Up
ENSG00000143772	ITPKB	protein_coding	2.645	6.254	6.254	-1.77043	0.00050713	Up
ENSG00000227718	AC016730.1	lncRNA	2.625	6.171	6.171	-1.70226	0.00040814	Up
ENSG00000101951	PAGE4	protein_coding	2.623	6.161	6.161	-1.40314	0.00022909	Up
ENSG00000144339	TMEFF2	protein_coding	2.62	6.146	6.146	0.75862	3.4864e-8	Up
ENSG00000010327	STAB1	protein_coding	2.614	6.122	6.122	-0.680204	1.9609e-05	Up
ENSG00000175084	DES	protein_coding	2.602	6.071	6.071	0.00271168	8.3111e-7	Up
ENSG00000256006	AC084117.1	lncRNA	2.592	6.031	6.031	-0.72291	4.0282e-05	Up
ENSG00000152137	HSPB8	protein_coding	2.582	5.986	5.986	3.23319	5.4789e-13	Up
ENSG00000254290	AC124067.4	lncRNA	2.577	5.966	5.966	0.0700402	6.7986e-06	Up
ENSG00000171533	MAP6	protein_coding	2.577	5.969	5.969	1.17907	4.0987e-9	Up
ENSG00000050628	PTGER3	protein_coding	2.577	5.968	5.968	-0.544991	4.4349e-06	Up
ENSG00000122641	INHBA	protein_coding	2.577	5.966	5.966	-0.176061	2.7435e-05	Up
ENSG00000182492	BGN	protein_coding	2.573	5.951	5.951	-1.33214	9.6335e-05	Up
ENSG00000014257	ACPP	protein_coding	2.56	5.897	5.897	1.14471	5.9093e-8	Up
ENSG00000198753	PLXNB3	protein_coding	2.558	5.889	5.889	-1.06691	0.0021166	Up
ENSG00000137868	STRA6	protein_coding	2.556	5.882	5.882	0.915388	1.4326e-8	Up
ENSG00000135046	ANXA1	protein_coding	2.551	5.862	5.862	4.26688	5.7267e-14	Up
ENSG00000237512	UNC5B-AS1	lncRNA	2.546	5.842	5.842	-1.11064	0.00039461	Up
ENSG00000261051	AC107021.2	lncRNA	2.545	5.835	5.835	1.01926	1.902e-8	Up
ENSG00000275038	AC091980.2	lncRNA	2.542	5.822	5.822	-1.28138	9.4648e-05	Up
ENSG00000286113	AC022868.2	lncRNA	2.539	5.812	5.812	-1.02383	4.093e-05	Up
ENSG00000178522	AMBN	protein_coding	2.532	5.786	5.786	2.91242	7.5211e-12	Up
ENSG00000167766	ZNF83	protein_coding	2.509	5.691	5.691	0.418572	4.0193e-7	Up
ENSG00000136250	AOAH	protein_coding	2.502	5.666	5.666	-0.108775	1.942e-06	Up
ENSG00000125337	KIF25	protein_coding	2.501	5.663	5.663	0.705599	1.9745e-7	Up
ENSG00000272405	AL365181.3	lncRNA	2.5	5.655	5.655	-0.747244	8.7023e-06	Up
ENSG00000059804	SLC2A3	protein_coding	2.494	5.632	5.632	6.8382	4.3232e-14	Up
ENSG00000176746	MAGEB6	protein_coding	2.484	5.594	5.594	-1.15539	0.00027687	Up
ENSG00000104435	STMN2	protein_coding	2.461	5.507	5.507	0.78227	1.8769e-7	Up
ENSG00000133101	CCNA1	protein_coding	2.461	5.505	5.505	-0.439307	4.653e-06	Up
ENSG00000147614	ATP6V0D2	protein_coding	2.455	5.484	5.484	1.22181	6.0593e-9	Up
ENSG00000049247	UTS2	protein_coding	2.454	5.48	5.48	-1.53482	0.00029454	Up
ENSG00000197128	ZNF772	protein_coding	2.451	5.466	5.466	1.23778	1.0903e-7	Up
ENSG00000275763	C18orf65	lncRNA	2.431	5.391	5.391	-0.9172	4.5305e-05	Up
ENSG00000253414	AC124067.2	lncRNA	2.43	5.387	5.387	1.47139	1.5693e-8	Up
ENSG00000203326	ZNF525	protein_coding	2.412	5.322	5.322	-0.669307	4.3171e-05	Up
ENSG00000196890	HIST3H2BB	protein_coding	2.405	5.297	5.297	3.16385	2.8997e-11	Up
ENSG00000223949	ROR1-AS1	lncRNA	2.403	5.289	5.289	-0.350418	2.0728e-05	Up
ENSG00000140986	RPL3L	protein_coding	2.399	5.275	5.275	-0.616089	5.86e-05	Up
ENSG00000245532	NEAT1	lncRNA	2.386	5.228	5.228	8.75981	1.8513e-13	Up
ENSG00000133110	POSTN	protein_coding	2.381	5.21	5.21	-1.17002	0.00015868	Up
ENSG00000168754	FAM178B	protein_coding	2.377	5.196	5.196	-1.51485	0.00067481	Up
ENSG00000139219	COL2A1	protein_coding	2.372	5.175	5.175	-1.14065	0.00041068	Up
ENSG00000253123	AC091182.1	lncRNA	2.363	5.145	5.145	4.23389	1.3211e-13	Up
ENSG00000168079	SCARA5	protein_coding	2.361	5.137	5.137	2.61467	2.0125e-10	Up
ENSG00000185633	NDUFA4L2	protein_coding	2.353	5.11	5.11	1.25731	3.2095e-8	Up
ENSG00000145040	UCN2	protein_coding	2.345	5.08	5.08	-0.969309	0.00021154	Up
ENSG00000237595	LINC01275	lncRNA	2.344	5.075	5.075	-0.574479	0.00011045	Up
ENSG00000143171	RXRG	protein_coding	2.344	5.078	5.078	0.559575	6.2456e-7	Up
ENSG00000198910	L1CAM	protein_coding	2.335	5.046	5.046	2.45307	1.4433e-10	Up
ENSG00000164125	GASK1B	protein_coding	2.322	4.999	4.999	-0.956336	0.00045948	Up
ENSG00000226686	LINC01535	lncRNA	2.32	4.992	4.992	0.269881	1.1017e-06	Up
ENSG00000139329	LUM	protein_coding	2.319	4.99	4.99	0.149289	9.2486e-06	Up
ENSG00000175766	EIF4E1B	protein_coding	2.318	4.987	4.987	-1.36686	0.00099706	Up
ENSG00000189223	PAX8-AS1	lncRNA	2.309	4.955	4.955	-1.03808	0.00011965	Up
ENSG00000159167	STC1	protein_coding	2.307	4.947	4.947	4.19132	1.5189e-13	Up
ENSG00000143320	CRABP2	protein_coding	2.301	4.927	4.927	5.43197	7.6994e-15	Up
ENSG00000232677	LINC00665	lncRNA	2.296	4.91	4.91	1.65494	1.7731e-8	Up
ENSG00000155495	MAGEC1	protein_coding	2.295	4.908	4.908	0.268176	4.0839e-06	Up
ENSG00000012124	CD22	protein_coding	2.29	4.891	4.891	-1.51558	0.00052992	Up
ENSG00000142619	PADI3	protein_coding	2.285	4.875	4.875	1.10328	5.2277e-8	Up
ENSG00000013588	GPRC5A	protein_coding	2.276	4.845	4.845	3.81712	3.3586e-13	Up
ENSG00000152049	KCNE4	protein_coding	2.275	4.841	4.841	-1.21737	0.00029924	Up
ENSG00000138347	MYPN	protein_coding	2.27	4.823	4.823	0.882863	3.1872e-05	Up
ENSG00000128510	CPA4	protein_coding	2.266	4.808	4.808	-0.307582	9.8633e-06	Up
ENSG00000108551	RASD1	protein_coding	2.264	4.802	4.802	-0.878849	0.00011638	Up
ENSG00000236384	LINC00479	lncRNA	2.262	4.795	4.795	-1.20097	0.00028759	Up
ENSG00000253230	LINC00599	lncRNA	2.261	4.793	4.793	0.400516	2.9271e-7	Up
ENSG00000105605	CACNG7	protein_coding	2.259	4.785	4.785	0.789295	4.9468e-7	Up
ENSG00000147256	ARHGAP36	protein_coding	2.256	4.777	4.777	-1.38498	0.00032706	Up
ENSG00000213793	ZNF888	protein_coding	2.249	4.752	4.752	-0.038047	2.9842e-06	Up
ENSG00000138119	MYOF	protein_coding	2.245	4.739	4.739	1.51104	1.659e-8	Up
ENSG00000150722	PPP1R1C	protein_coding	2.236	4.71	4.71	-0.264687	6.7274e-06	Up
ENSG00000103196	CRISPLD2	protein_coding	2.225	4.676	4.676	1.04407	2.313e-7	Up
ENSG00000167178	ISLR2	protein_coding	2.223	4.669	4.669	-1.385	0.00058871	Up
ENSG00000099260	PALMD	protein_coding	2.222	4.665	4.665	0.0689495	3.0788e-06	Up
ENSG00000261302	AC106779.1	lncRNA	2.218	4.653	4.653	-0.891133	0.00024568	Up
ENSG00000170949	ZNF160	protein_coding	2.218	4.652	4.652	1.65939	6.7812e-9	Up
ENSG00000135346	CGA	protein_coding	2.214	4.64	4.64	0.292598	8.6072e-7	Up
ENSG00000169427	KCNK9	protein_coding	2.214	4.639	4.639	-0.703005	6.1371e-05	Up
ENSG00000102287	GABRE	protein_coding	2.213	4.636	4.636	3.11297	8.9051e-11	Up
ENSG00000130303	BST2	protein_coding	2.213	4.638	4.638	1.14799	5.2974e-8	Up
ENSG00000180257	ZNF816	protein_coding	2.212	4.634	4.634	-0.670187	9.1804e-05	Up
ENSG00000285587	AC012470.1	lncRNA	2.2	4.594	4.594	-1.29809	0.00050595	Up
ENSG00000196867	ZFP28	protein_coding	2.195	4.579	4.579	1.18063	7.2073e-8	Up
ENSG00000121966	CXCR4	protein_coding	2.187	4.555	4.555	6.13373	3.2698e-13	Up
ENSG00000169548	ZNF280A	protein_coding	2.182	4.537	4.537	-0.358769	1.2746e-05	Up
ENSG00000266970	AC061992.1	lncRNA	2.181	4.534	4.534	-0.24045	1.0787e-05	Up
ENSG00000255346	NOX5	protein_coding	2.176	4.518	4.518	-1.14013	0.00046441	Up
ENSG00000089101	CFAP61	protein_coding	2.172	4.505	4.505	-0.702461	0.00014809	Up
ENSG00000196754	S100A2	protein_coding	2.17	4.499	4.499	0.0356562	1.3966e-05	Up
ENSG00000225446	LINC01763	lncRNA	2.169	4.496	4.496	-0.486585	7.7298e-05	Up
ENSG00000049249	TNFRSF9	protein_coding	2.163	4.478	4.478	0.847964	1.8092e-7	Up
ENSG00000206384	COL6A6	protein_coding	2.159	4.466	4.466	-0.658553	0.00027449	Up
ENSG00000184343	SRPK3	protein_coding	2.159	4.466	4.466	-1.28213	0.0025173	Up
ENSG00000182885	ADGRG3	protein_coding	2.153	4.449	4.449	-0.154938	2.8072e-05	Up
ENSG00000099365	STX1B	protein_coding	2.151	4.441	4.441	1.66614	8.5712e-9	Up
ENSG00000185869	ZNF829	protein_coding	2.145	4.422	4.422	0.497345	1.6321e-06	Up
ENSG00000019505	SYT13	protein_coding	2.145	4.424	4.424	-0.818285	0.00016311	Up
ENSG00000128242	GAL3ST1	protein_coding	2.144	4.421	4.421	0.723022	2.2161e-06	Up
ENSG00000246863	AC012377.1	lncRNA	2.139	4.403	4.403	-1.23296	0.00066017	Up
ENSG00000080031	PTPRH	protein_coding	2.131	4.38	4.38	1.4431	4.4936e-8	Up
ENSG00000167749	KLK4	protein_coding	2.127	4.367	4.367	-0.0103034	6.7085e-06	Up
ENSG00000135407	AVIL	protein_coding	2.126	4.365	4.365	-0.956491	0.00058447	Up
ENSG00000148357	HMCN2	protein_coding	2.125	4.363	4.363	-0.324413	1.7573e-05	Up
ENSG00000163873	GRIK3	protein_coding	2.125	4.362	4.362	-1.11082	0.00084428	Up
ENSG00000111452	ADGRD1	protein_coding	2.123	4.356	4.356	-0.725643	0.00033651	Up
ENSG00000177807	KCNJ10	protein_coding	2.121	4.35	4.35	-0.178038	3.069e-05	Up
ENSG00000276966	HIST1H4E	protein_coding	2.12	4.347	4.347	-0.841242	0.00052862	Up
ENSG00000122012	SV2C	protein_coding	2.111	4.32	4.32	-1.6373	0.0012187	Up
ENSG00000164867	NOS3	protein_coding	2.11	4.318	4.318	-1.24953	0.00095973	Up
ENSG00000271880	AGAP11	lncRNA	2.103	4.295	4.295	-0.893101	0.00055618	Up
ENSG00000205129	C4orf47	protein_coding	2.099	4.283	4.283	-0.177978	7.3837e-06	Up
ENSG00000278493	AC039056.2	lncRNA	2.098	4.28	4.28	-1.08061	0.00015623	Up
ENSG00000167779	IGFBP6	protein_coding	2.095	4.273	4.273	0.101604	6.4708e-06	Up
ENSG00000080573	COL5A3	protein_coding	2.094	4.27	4.27	-1.26498	0.0013465	Up
ENSG00000198203	SULT1C2	protein_coding	2.089	4.256	4.256	0.0363883	8.1206e-06	Up
ENSG00000237751	LINC01143	lncRNA	2.088	4.252	4.252	-1.15542	0.00046288	Up
ENSG00000137834	SMAD6	protein_coding	2.088	4.253	4.253	5.93505	1.2656e-14	Up
ENSG00000160321	ZNF208	protein_coding	2.083	4.238	4.238	-0.86709	0.00013182	Up
ENSG00000197124	ZNF682	protein_coding	2.082	4.235	4.235	-0.943875	0.00020545	Up
ENSG00000280639	LINC02204	lncRNA	2.08	4.229	4.229	-1.43914	0.00076232	Up
ENSG00000244405	ETV5	protein_coding	2.079	4.224	4.224	-0.420602	2.9261e-05	Up
ENSG00000111799	COL12A1	protein_coding	2.074	4.211	4.211	0.585641	4.4181e-06	Up
ENSG00000139567	ACVRL1	protein_coding	2.071	4.202	4.202	0.781267	8.5265e-06	Up
ENSG00000123338	NCKAP1L	protein_coding	2.071	4.202	4.202	-1.42114	0.0013954	Up
ENSG00000104783	KCNN4	protein_coding	2.071	4.203	4.203	-0.556801	0.0014166	Up
ENSG00000277223	AC090116.1	lncRNA	2.063	4.18	4.18	-1.00932	0.00040939	Up
ENSG00000196639	HRH1	protein_coding	2.061	4.173	4.173	-0.606986	0.00020559	Up
ENSG00000248773	AC108727.1	lncRNA	2.06	4.169	4.169	-1.57455	0.00095204	Up
ENSG00000140465	CYP1A1	protein_coding	2.059	4.166	4.166	2.06435	2.5447e-9	Up
ENSG00000159224	GIP	protein_coding	2.058	4.165	4.165	-0.564575	5.6065e-05	Up
ENSG00000283122	HYMAI	lncRNA	2.049	4.139	4.139	0.714589	5.8859e-7	Up
ENSG00000203952	CCDC160	protein_coding	2.048	4.136	4.136	0.484268	2.0023e-06	Up
ENSG00000254207	AC100797.1	lncRNA	2.044	4.125	4.125	-1.05273	0.00039064	Up
ENSG00000067066	SP100	protein_coding	2.042	4.119	4.119	-0.30783	3.1645e-05	Up
ENSG00000102359	SRPX2	protein_coding	2.04	4.111	4.111	1.04228	1.3318e-7	Up
ENSG00000100867	DHRS2	protein_coding	2.039	4.109	4.109	3.59442	8.5237e-11	Up
ENSG00000166863	TAC3	protein_coding	2.039	4.109	4.109	-0.903898	0.00016929	Up
ENSG00000189058	APOD	protein_coding	2.037	4.105	4.105	-0.170803	1.8189e-05	Up
ENSG00000244041	LINC01011	lncRNA	2.032	4.091	4.091	2.47627	1.9463e-10	Up
ENSG00000113083	LOX	protein_coding	2.028	4.077	4.077	6.03483	1.0974e-12	Up
ENSG00000226979	LTA	protein_coding	2.025	4.069	4.069	-0.506312	0.00026056	Up
ENSG00000004846	ABCB5	protein_coding	2.025	4.07	4.07	-1.53462	0.0018152	Up
ENSG00000161298	ZNF382	protein_coding	2.024	4.068	4.068	0.44373	2.9244e-06	Up
ENSG00000173947	PIFO	protein_coding	2.024	4.068	4.068	-0.468692	0.00034202	Up
ENSG00000100346	CACNA1I	protein_coding	2.023	4.063	4.063	1.32617	2.1526e-7	Up
ENSG00000138798	EGF	protein_coding	2.021	4.059	4.059	1.21423	1.5098e-06	Up
ENSG00000283740	TAF11L11	protein_coding	2.014	4.039	4.039	-1.57437	0.0012989	Up
ENSG00000130066	SAT1	protein_coding	2.009	4.026	4.026	7.70882	4.4963e-14	Up
ENSG00000281406	BLACAT1	protein_coding	2.005	4.015	4.015	-1.29853	0.00053874	Up
ENSG00000229869	AL359878.2	lncRNA	1.998	3.994	3.994	-0.208764	4.23e-05	Up
ENSG00000244459	AC147067.1	lncRNA	1.997	3.993	3.993	-1.03805	0.00036917	Up
ENSG00000256139	AC007637.1	lncRNA	1.997	3.992	3.992	-1.07988	0.0004061	Up
ENSG00000166736	HTR3A	protein_coding	1.992	3.978	3.978	-0.794446	0.001805	Up
ENSG00000227533	SLC2A1-AS1	lncRNA	1.98	3.946	3.946	2.29293	1.2079e-9	Up
ENSG00000273540	AGBL1	protein_coding	1.979	3.941	3.941	-0.606435	0.00030177	Up
ENSG00000167608	TMC4	protein_coding	1.978	3.941	3.941	-1.12537	0.00097743	Up
ENSG00000075426	FOSL2	protein_coding	1.973	3.925	3.925	3.77419	1.8977e-12	Up
ENSG00000175262	C1orf127	protein_coding	1.973	3.925	3.925	-0.747361	0.00034441	Up
ENSG00000180353	HCLS1	protein_coding	1.972	3.924	3.924	-1.17033	0.0015458	Up
ENSG00000272449	AL139246.5	lncRNA	1.969	3.914	3.914	3.76885	1.0275e-10	Up
ENSG00000143217	NECTIN4	protein_coding	1.969	3.915	3.915	1.6431	2.9287e-7	Up
ENSG00000197620	CXorf40A	protein_coding	1.967	3.911	3.911	7.01159	1.3328e-14	Up
ENSG00000169393	AC010330.1	protein_coding	1.964	3.901	3.901	-0.57573	0.00073816	Up
ENSG00000118515	SGK1	protein_coding	1.963	3.9	3.9	3.32826	1.3751e-11	Up
ENSG00000132026	RTBDN	protein_coding	1.957	3.882	3.882	-0.648035	0.00016675	Up
ENSG00000189275	LINC01164	lncRNA	1.95	3.863	3.863	-1.33231	0.0054532	Up
ENSG00000134107	BHLHE40	protein_coding	1.949	3.862	3.862	7.58287	4.3232e-14	Up
ENSG00000102349	KLF8	protein_coding	1.948	3.859	3.859	-1.21721	0.0024849	Up
ENSG00000165409	TSHR	protein_coding	1.944	3.849	3.849	-1.28184	0.00091927	Up
ENSG00000225950	NTF4	protein_coding	1.944	3.848	3.848	-1.36683	0.001232	Up
ENSG00000176840	MIR7-3HG	lncRNA	1.942	3.842	3.842	-1.09619	0.0012865	Up
ENSG00000265972	TXNIP	protein_coding	1.942	3.842	3.842	6.85137	1.1322e-13	Up
ENSG00000132274	TRIM22	protein_coding	1.941	3.839	3.839	-0.819686	0.022707	Up
ENSG00000128340	RAC2	protein_coding	1.94	3.836	3.836	0.497675	4.8278e-06	Up
ENSG00000197769	MAP1LC3C	protein_coding	1.939	3.834	3.834	1.13621	2.5194e-7	Up
ENSG00000277511	AC116407.2	lncRNA	1.935	3.825	3.825	-0.681091	0.00027429	Up
ENSG00000124216	SNAI1	protein_coding	1.935	3.824	3.824	1.64013	2.1932e-7	Up
ENSG00000197406	DIO3	protein_coding	1.923	3.792	3.792	-0.605272	0.00020002	Up
ENSG00000229896	AL157373.2	lncRNA	1.919	3.781	3.781	-0.943112	0.00028865	Up
ENSG00000198797	BRINP2	protein_coding	1.917	3.777	3.777	-0.0730007	1.8897e-05	Up
ENSG00000099860	GADD45B	protein_coding	1.916	3.773	3.773	4.27086	3.1187e-11	Up
ENSG00000221955	SLC12A8	protein_coding	1.914	3.768	3.768	-1.367	0.0010773	Up
ENSG00000278811	LINC00624	lncRNA	1.911	3.76	3.76	-0.71473	0.00057411	Up
ENSG00000233221	AC133785.1	lncRNA	1.909	3.755	3.755	-1.15576	0.0021829	Up
ENSG00000226900	AL451069.1	lncRNA	1.909	3.755	3.755	-1.61614	0.0037446	Up
ENSG00000064787	BCAS1	protein_coding	1.909	3.754	3.754	0.77719	2.1568e-06	Up
ENSG00000166923	GREM1	protein_coding	1.909	3.754	3.754	-1.42134	0.0034096	Up
ENSG00000149090	PAMR1	protein_coding	1.907	3.751	3.751	-0.332756	3.7754e-05	Up
ENSG00000273102	AP000569.1	lncRNA	1.902	3.736	3.736	-0.616658	0.00026425	Up
ENSG00000204287	HLA-DRA	protein_coding	1.898	3.726	3.726	2.26181	2.4245e-9	Up
ENSG00000110002	VWA5A	protein_coding	1.89	3.707	3.707	2.04481	2.182e-8	Up
ENSG00000184925	LCN12	protein_coding	1.889	3.705	3.705	-0.56405	0.00030921	Up
ENSG00000283959	AP002851.1	lncRNA	1.884	3.69	3.69	-1.18612	0.0021575	Up
ENSG00000263753	LINC00667	lncRNA	1.883	3.687	3.687	-1.17038	0.00077534	Up
ENSG00000158050	DUSP2	protein_coding	1.876	3.67	3.67	-1.49576	0.0024443	Up
ENSG00000231920	NEBL-AS1	lncRNA	1.875	3.669	3.669	-1.38464	0.002116	Up
ENSG00000166473	PKD1L2	protein_coding	1.87	3.654	3.654	0.794485	9.0892e-7	Up
ENSG00000175189	INHBC	protein_coding	1.87	3.657	3.657	-0.969441	0.00048468	Up
ENSG00000177464	GPR4	protein_coding	1.866	3.646	3.646	-1.68006	0.0051537	Up
ENSG00000100097	LGALS1	protein_coding	1.862	3.634	3.634	3.22826	6.9445e-11	Up
ENSG00000172346	CSDC2	protein_coding	1.861	3.634	3.634	2.22151	4.9783e-9	Up
ENSG00000155265	GOLGA7B	protein_coding	1.861	3.632	3.632	0.433914	1.6854e-05	Up
ENSG00000167895	TMC8	protein_coding	1.86	3.631	3.631	-0.0871067	3.1756e-05	Up
ENSG00000184584	TMEM173	protein_coding	1.858	3.624	3.624	1.44958	2.0125e-7	Up
ENSG00000109321	AREG	protein_coding	1.855	3.617	3.617	-1.20077	0.0038563	Up
ENSG00000153233	PTPRR	protein_coding	1.852	3.609	3.609	-0.132383	1.8315e-05	Up
ENSG00000278611	ZNF426-DT	lncRNA	1.844	3.589	3.589	0.0171233	1.9395e-05	Up
ENSG00000114268	PFKFB4	protein_coding	1.844	3.591	3.591	4.97044	1.1247e-13	Up
ENSG00000232028	AC007391.1	lncRNA	1.843	3.589	3.589	-1.10903	0.0013681	Up
ENSG00000123095	BHLHE41	protein_coding	1.841	3.582	3.582	3.92268	5.4471e-12	Up
ENSG00000152439	ZNF773	protein_coding	1.841	3.582	3.582	1.03632	9.2215e-7	Up
ENSG00000247095	MIR210HG	lncRNA	1.84	3.581	3.581	4.15557	1.1949e-12	Up
ENSG00000184599	FAM19A3	protein_coding	1.838	3.575	3.575	-0.505901	0.00021435	Up
ENSG00000162873	KLHDC8A	protein_coding	1.838	3.575	3.575	-1.28179	0.0020758	Up
ENSG00000164442	CITED2	protein_coding	1.837	3.572	3.572	6.46124	1.2656e-14	Up
ENSG00000187026	KRTAP21-2	protein_coding	1.835	3.568	3.568	-0.170807	5.892e-05	Up
ENSG00000124253	PCK1	protein_coding	1.834	3.564	3.564	1.88447	1.028e-7	Up
ENSG00000116299	KIAA1324	protein_coding	1.834	3.565	3.565	0.658612	1.7057e-06	Up
ENSG00000143226	FCGR2A	protein_coding	1.831	3.558	3.558	-0.99696	0.00075504	Up
ENSG00000104419	NDRG1	protein_coding	1.825	3.542	3.542	8.88523	8.6535e-14	Up
ENSG00000155465	SLC7A7	protein_coding	1.825	3.543	3.543	-0.403815	0.00031449	Up
ENSG00000058335	RASGRF1	protein_coding	1.821	3.534	3.534	2.01423	5.8301e-9	Up
ENSG00000187848	P2RX2	protein_coding	1.821	3.533	3.533	1.3177	1.0365e-7	Up
ENSG00000174403	MIR1-1HG-AS1	lncRNA	1.82	3.531	3.531	1.47198	9.7499e-8	Up
ENSG00000254477	AP000640.1	lncRNA	1.82	3.531	3.531	-1.29842	0.0029823	Up
ENSG00000143847	PPFIA4	protein_coding	1.819	3.527	3.527	5.40133	4.3232e-14	Up
ENSG00000121101	TEX14	protein_coding	1.819	3.529	3.529	2.0331	1.5375e-8	Up
ENSG00000204389	HSPA1A	protein_coding	1.818	3.526	3.526	0.214893	0.00019101	Up
ENSG00000272695	GAS6-DT	lncRNA	1.816	3.522	3.522	-1.12495	0.00096408	Up
ENSG00000137331	IER3	protein_coding	1.815	3.519	3.519	4.81914	1.4134e-13	Up
ENSG00000077274	CAPN6	protein_coding	1.815	3.519	3.519	0.388594	5.1233e-06	Up
ENSG00000135406	PRPH	protein_coding	1.812	3.512	3.512	1.23793	9.017e-7	Up
ENSG00000233695	GAS6-AS1	lncRNA	1.807	3.5	3.5	-0.00358519	7.5368e-05	Up
ENSG00000177337	DLGAP1-AS1	lncRNA	1.805	3.495	3.495	-0.606134	0.00078931	Up
ENSG00000269935	AC092720.2	lncRNA	1.803	3.488	3.488	-0.818705	0.00064561	Up
ENSG00000163565	IFI16	protein_coding	1.801	3.486	3.486	-0.358655	7.3737e-05	Up
ENSG00000260641	AC114811.2	lncRNA	1.8	3.483	3.483	-0.72525	0.00044658	Up
ENSG00000077327	SPAG6	protein_coding	1.8	3.483	3.483	-1.5347	0.0037916	Up
ENSG00000095752	IL11	protein_coding	1.797	3.476	3.476	1.17513	1.942e-06	Up
ENSG00000160097	FNDC5	protein_coding	1.797	3.474	3.474	0.657843	4.38e-06	Up
ENSG00000275092	AL031710.2	lncRNA	1.795	3.469	3.469	0.342647	2.293e-05	Up
ENSG00000267254	AC020928.1	lncRNA	1.793	3.465	3.465	-1.1394	0.0018874	Up
ENSG00000170421	KRT8	protein_coding	1.79	3.457	3.457	6.08882	1.8224e-14	Up
ENSG00000274698	AC099521.1	lncRNA	1.789	3.455	3.455	-0.0377439	3.3529e-05	Up
ENSG00000117152	RGS4	protein_coding	1.788	3.453	3.453	0.329801	1.2041e-05	Up
ENSG00000180596	HIST1H2BC	protein_coding	1.785	3.446	3.446	-0.332262	8.8838e-05	Up
ENSG00000182264	IZUMO1	protein_coding	1.778	3.429	3.429	0.298357	2.3654e-05	Up
ENSG00000238198	AL357055.3	lncRNA	1.775	3.422	3.422	-0.983615	0.00099228	Up
ENSG00000274267	HIST1H3B	protein_coding	1.775	3.423	3.423	-0.681342	0.00079571	Up
ENSG00000148677	ANKRD1	protein_coding	1.767	3.403	3.403	1.37331	7.057e-7	Up
ENSG00000180730	SHISA2	protein_coding	1.766	3.402	3.402	5.42448	1.1322e-13	Up
ENSG00000144655	CSRNP1	protein_coding	1.766	3.402	3.402	4.17081	4.579e-12	Up
ENSG00000101203	COL20A1	protein_coding	1.764	3.396	3.396	-1.05244	0.00073159	Up
ENSG00000167984	NLRC3	protein_coding	1.761	3.389	3.389	-1.59513	0.0029844	Up
ENSG00000274979	AC020656.2	lncRNA	1.76	3.386	3.386	-1.28177	0.0041539	Up
ENSG00000180422	LINC00304	lncRNA	1.76	3.386	3.386	-1.57473	0.0096421	Up
ENSG00000125968	ID1	protein_coding	1.76	3.388	3.388	4.53191	1.3127e-12	Up
ENSG00000160539	PLPP7	protein_coding	1.76	3.388	3.388	1.41818	3.4009e-7	Up
ENSG00000176593	AC008969.1	lncRNA	1.759	3.385	3.385	-0.367097	9.5242e-05	Up
ENSG00000188227	ZNF793	protein_coding	1.759	3.384	3.384	-0.422684	0.0011372	Up
ENSG00000261150	EPPK1	protein_coding	1.755	3.375	3.375	-0.854135	0.001182	Up
ENSG00000259977	AL121578.3	lncRNA	1.751	3.366	3.366	-0.403061	0.00016865	Up
ENSG00000104112	SCG3	protein_coding	1.746	3.354	3.354	-0.0817072	0.00013415	Up
ENSG00000181458	TMEM45A	protein_coding	1.744	3.35	3.35	4.82353	4.1318e-12	Up
ENSG00000214919	AC104472.1	lncRNA	1.742	3.346	3.346	-1.08027	0.0010853	Up
ENSG00000167759	KLK13	protein_coding	1.737	3.334	3.334	-1.23306	0.0046786	Up
ENSG00000158825	CDA	protein_coding	1.736	3.332	3.332	1.60522	2.6802e-7	Up
ENSG00000285877	AC007448.4	lncRNA	1.734	3.327	3.327	-0.555567	0.00036197	Up
ENSG00000275576	AL049539.1	lncRNA	1.73	3.318	3.318	-1.037	0.0078001	Up
ENSG00000120885	CLU	protein_coding	1.728	3.312	3.312	5.50077	1.1949e-12	Up
ENSG00000152256	PDK1	protein_coding	1.726	3.308	3.308	6.81953	4.4963e-14	Up
ENSG00000134531	EMP1	protein_coding	1.726	3.309	3.309	2.64214	2.9323e-9	Up
ENSG00000197134	ZNF257	protein_coding	1.726	3.309	3.309	-1.20091	0.0010771	Up
ENSG00000127507	ADGRE2	protein_coding	1.725	3.305	3.305	-0.155058	0.00018501	Up
ENSG00000064195	DLX3	protein_coding	1.725	3.305	3.305	-0.458682	0.0003385	Up
ENSG00000164929	BAALC	protein_coding	1.724	3.305	3.305	0.263175	1.7425e-05	Up
ENSG00000183018	AC118754.1	protein_coding	1.724	3.303	3.303	0.229508	3.4085e-05	Up
ENSG00000118137	APOA1	protein_coding	1.722	3.299	3.299	-1.20123	0.0017202	Up
ENSG00000253210	AC040970.1	lncRNA	1.721	3.296	3.296	-0.575078	0.00037698	Up
ENSG00000261504	LINC01686	lncRNA	1.72	3.295	3.295	-1.0389	0.0021874	Up
ENSG00000226508	LINC01918	lncRNA	1.718	3.29	3.29	-0.192889	6.0683e-05	Up
ENSG00000223865	HLA-DPB1	protein_coding	1.717	3.288	3.288	1.79495	9.7188e-8	Up
ENSG00000231672	DIRC3	lncRNA	1.716	3.284	3.284	0.384414	1.2306e-05	Up
ENSG00000272084	AL137127.1	lncRNA	1.716	3.286	3.286	-0.9566	0.0014482	Up
ENSG00000280383	Z95331.1	lncRNA	1.707	3.265	3.265	1.48691	1.9974e-06	Up
ENSG00000270021	AC026691.1	lncRNA	1.707	3.264	3.264	-0.648013	0.00050713	Up
ENSG00000140279	DUOX2	protein_coding	1.704	3.257	3.257	-0.648692	0.00066017	Up
ENSG00000168314	MOBP	protein_coding	1.704	3.258	3.258	-1.45794	0.006196	Up
ENSG00000141293	SKAP1	protein_coding	1.703	3.256	3.256	-1.34979	0.0040778	Up
ENSG00000274667	AC090517.2	lncRNA	1.702	3.253	3.253	-0.983067	0.0013958	Up
ENSG00000151615	POU4F2	protein_coding	1.702	3.254	3.254	-1.06755	0.0051551	Up
ENSG00000285886	AC211476.6	lncRNA	1.701	3.251	3.251	-1.26559	0.0048615	Up
ENSG00000128342	LIF	protein_coding	1.7	3.248	3.248	1.90502	5.2438e-7	Up
ENSG00000158859	ADAMTS4	protein_coding	1.7	3.248	3.248	-0.225344	0.00019683	Up
ENSG00000261341	AC010325.1	protein_coding	1.699	3.246	3.246	-1.38493	0.0051665	Up
ENSG00000015413	DPEP1	protein_coding	1.697	3.243	3.243	-0.626802	0.000489	Up
ENSG00000158486	DNAH3	protein_coding	1.697	3.242	3.242	-0.996858	0.0013094	Up
ENSG00000223969	AC002456.1	lncRNA	1.696	3.241	3.241	-0.565491	0.00057248	Up
ENSG00000255874	LINC00346	lncRNA	1.695	3.237	3.237	0.258611	1.2593e-05	Up
ENSG00000270164	LINC01480	lncRNA	1.693	3.232	3.232	-0.394711	0.00024488	Up
ENSG00000233296	AC092159.2	lncRNA	1.693	3.233	3.233	-1.20118	0.0015471	Up
ENSG00000152689	RASGRP3	protein_coding	1.692	3.231	3.231	-1.09556	0.0040932	Up
ENSG00000214145	LINC00887	lncRNA	1.688	3.223	3.223	-0.854055	0.00033989	Up
ENSG00000187583	PLEKHN1	protein_coding	1.688	3.223	3.223	-1.29849	0.0024443	Up
ENSG00000073861	TBX21	protein_coding	1.687	3.22	3.22	-0.794278	0.0015118	Up
ENSG00000129682	FGF13	protein_coding	1.686	3.217	3.217	1.76017	4.0038e-7	Up
ENSG00000187957	DNER	protein_coding	1.686	3.217	3.217	-1.21676	0.0019738	Up
ENSG00000204604	ZNF468	protein_coding	1.684	3.213	3.213	1.02865	5.0858e-06	Up
ENSG00000167555	ZNF528	protein_coding	1.683	3.21	3.21	-0.505829	0.0002672	Up
ENSG00000171223	JUNB	protein_coding	1.679	3.201	3.201	4.40197	1.3691e-12	Up
ENSG00000188672	RHCE	protein_coding	1.679	3.203	3.203	1.60286	5.6788e-7	Up
ENSG00000141738	GRB7	protein_coding	1.679	3.203	3.203	-0.340638	0.0001291	Up
ENSG00000042781	USH2A	protein_coding	1.676	3.196	3.196	-0.930448	0.0013569	Up
ENSG00000213185	FAM24B	protein_coding	1.676	3.195	3.195	-1.15525	0.0031843	Up
ENSG00000270171	AL359881.3	lncRNA	1.674	3.19	3.19	-0.84107	0.00058065	Up
ENSG00000234928	LINC01659	lncRNA	1.671	3.185	3.185	-1.18503	0.0027055	Up
ENSG00000273248	AC010997.5	lncRNA	1.67	3.182	3.182	-1.2005	0.0046392	Up
ENSG00000164440	TXLNB	protein_coding	1.67	3.182	3.182	-0.0319878	9.7787e-05	Up
ENSG00000108771	DHX58	protein_coding	1.668	3.177	3.177	-0.393772	0.00057375	Up
ENSG00000278743	AC087239.1	lncRNA	1.667	3.175	3.175	-1.1388	0.0086	Up
ENSG00000188785	ZNF548	protein_coding	1.666	3.173	3.173	2.19407	3.6146e-8	Up
ENSG00000106258	CYP3A5	protein_coding	1.666	3.174	3.174	1.19415	1.1515e-06	Up
ENSG00000160188	RSPH1	protein_coding	1.662	3.165	3.165	-1.31551	0.0023187	Up
ENSG00000158887	MPZ	protein_coding	1.659	3.159	3.159	1.57985	9.0076e-7	Up
ENSG00000146221	TCTE1	protein_coding	1.659	3.159	3.159	-0.411879	0.00036917	Up
ENSG00000064300	NGFR	protein_coding	1.658	3.156	3.156	3.19294	2.8672e-10	Up
ENSG00000180917	CMTR2	protein_coding	1.658	3.157	3.157	2.16973	5.8808e-8	Up
ENSG00000228701	TNKS2-AS1	lncRNA	1.655	3.149	3.149	-0.110994	0.00051441	Up
ENSG00000120129	DUSP1	protein_coding	1.653	3.144	3.144	6.0981	1.1322e-13	Up
ENSG00000149573	MPZL2	protein_coding	1.653	3.145	3.145	-0.29126	0.00070179	Up
ENSG00000225783	MIAT	lncRNA	1.652	3.143	3.143	0.490372	3.565e-05	Up
ENSG00000268364	SMC5-AS1	lncRNA	1.649	3.136	3.136	0.198895	7.7035e-05	Up
ENSG00000177301	KCNA2	protein_coding	1.649	3.137	3.137	1.46515	2.3961e-7	Up
ENSG00000235888	AF064858.1	lncRNA	1.648	3.134	3.134	-0.80534	0.0004759	Up
ENSG00000240032	LNCSRLR	lncRNA	1.648	3.134	3.134	-1.03721	0.0039643	Up
ENSG00000260774	AC021087.3	lncRNA	1.646	3.13	3.13	0.607965	7.0031e-06	Up
ENSG00000274204	AL138689.1	lncRNA	1.645	3.127	3.127	-0.891208	0.0010526	Up
ENSG00000259736	CRTC3-AS1	lncRNA	1.643	3.122	3.122	-0.69089	0.0010104	Up
ENSG00000184224	C11orf72	lncRNA	1.643	3.123	3.123	-1.03754	0.0012115	Up
ENSG00000253404	AC034243.1	lncRNA	1.643	3.123	3.123	-1.24883	0.0030376	Up
ENSG00000272092	AC087623.2	lncRNA	1.642	3.121	3.121	-0.737419	0.0024066	Up
ENSG00000091482	SMPX	protein_coding	1.641	3.12	3.12	-0.420611	0.00012337	Up
ENSG00000250303	AP002884.1	lncRNA	1.64	3.118	3.118	-0.298705	0.00027205	Up
ENSG00000197980	LEKR1	protein_coding	1.639	3.115	3.115	-1.10972	0.00095129	Up
ENSG00000226051	ZNF503-AS1	lncRNA	1.636	3.108	3.108	0.0763113	4.1579e-05	Up
ENSG00000178726	THBD	protein_coding	1.633	3.102	3.102	-0.701934	0.0014207	Up
ENSG00000285205	AL121612.2	lncRNA	1.631	3.098	3.098	1.38283	5.2986e-7	Up
ENSG00000215246	AC116351.1	lncRNA	1.63	3.095	3.095	-0.201401	0.00035172	Up
ENSG00000161992	PRR35	protein_coding	1.626	3.086	3.086	0.210732	5.3126e-05	Up
ENSG00000261186	LINC01238	lncRNA	1.625	3.084	3.084	-0.555028	0.00053565	Up
ENSG00000196268	ZNF493	protein_coding	1.623	3.079	3.079	0.589223	9.3149e-06	Up
ENSG00000135636	DYSF	protein_coding	1.621	3.075	3.075	0.439759	2.8862e-05	Up
ENSG00000151376	ME3	protein_coding	1.621	3.077	3.077	-0.585385	0.0018042	Up
ENSG00000272906	AL353708.3	lncRNA	1.62	3.074	3.074	1.27337	5.1615e-7	Up
ENSG00000170703	TTLL6	protein_coding	1.62	3.074	3.074	0.56453	9.3242e-06	Up
ENSG00000188064	WNT7B	protein_coding	1.62	3.073	3.073	0.30395	9.3681e-05	Up
ENSG00000114480	GBE1	protein_coding	1.618	3.069	3.069	5.42604	6.2558e-13	Up
ENSG00000274898	AC001226.1	lncRNA	1.617	3.068	3.068	-0.534182	0.00020308	Up
ENSG00000103089	FA2H	protein_coding	1.617	3.068	3.068	-0.648126	0.0021966	Up
ENSG00000166407	LMO1	protein_coding	1.616	3.066	3.066	0.0759835	4.1799e-05	Up
ENSG00000184845	DRD1	protein_coding	1.616	3.066	3.066	-1.2821	0.005595	Up
ENSG00000197415	VEPH1	protein_coding	1.616	3.065	3.065	-1.55399	0.017489	Up
ENSG00000269902	AC234772.2	lncRNA	1.614	3.06	3.06	-1.02344	0.0011612	Up
ENSG00000196968	FUT11	protein_coding	1.614	3.061	3.061	4.50589	3.1187e-11	Up
ENSG00000272853	AC069544.1	lncRNA	1.613	3.058	3.058	0.828128	7.1672e-06	Up
ENSG00000157703	SVOPL	protein_coding	1.612	3.056	3.056	-1.21727	0.01841	Up
ENSG00000177335	C8orf31	lncRNA	1.611	3.055	3.055	-0.73697	0.0013192	Up
ENSG00000184716	SERINC4	protein_coding	1.61	3.053	3.053	-0.565473	0.00078156	Up
ENSG00000152952	PLOD2	protein_coding	1.609	3.051	3.051	8.46428	2.0363e-11	Up
ENSG00000167232	ZNF91	protein_coding	1.609	3.05	3.05	0.774506	4.3446e-06	Up
ENSG00000253669	GASAL1	lncRNA	1.603	3.038	3.038	0.659804	9.3952e-06	Up
ENSG00000237452	BHMG1	protein_coding	1.603	3.038	3.038	-0.0113609	9.2484e-05	Up
ENSG00000284968	AC093827.4	lncRNA	1.598	3.027	3.027	-0.467025	0.00028511	Up
ENSG00000128564	VGF	protein_coding	1.597	3.025	3.025	0.157179	5.9962e-05	Up
ENSG00000197372	ZNF675	protein_coding	1.596	3.023	3.023	1.86961	2.9271e-7	Up
ENSG00000171954	CYP4F22	protein_coding	1.594	3.019	3.019	2.25028	2.3687e-8	Up
ENSG00000132031	MATN3	protein_coding	1.592	3.014	3.014	2.31335	7.7701e-8	Up
ENSG00000165511	C10orf25	lncRNA	1.591	3.012	3.012	-0.724608	0.0021723	Up
ENSG00000225833	AC097625.1	lncRNA	1.589	3.009	3.009	-0.771284	0.0013398	Up
ENSG00000249738	AC008691.1	lncRNA	1.588	3.006	3.006	0.24857	0.000182	Up
ENSG00000167748	KLK1	protein_coding	1.588	3.007	3.007	0.867838	8.5265e-06	Up
ENSG00000230534	AL392046.1	lncRNA	1.587	3.004	3.004	-1.45794	0.011615	Up
ENSG00000183421	RIPK4	protein_coding	1.583	2.996	2.996	4.7583	1.1789e-12	Up
ENSG00000154099	DNAAF1	protein_coding	1.583	2.997	2.997	0.170731	0.00030625	Up
ENSG00000273139	AC007663.3	lncRNA	1.581	2.992	2.992	-0.917712	0.0014012	Up
ENSG00000106633	GCK	protein_coding	1.581	2.992	2.992	-0.66	0.0025637	Up
ENSG00000130513	GDF15	protein_coding	1.58	2.99	2.99	2.94708	1.3245e-8	Up
ENSG00000256223	ZNF10	protein_coding	1.579	2.988	2.988	1.35327	1.2294e-06	Up
ENSG00000159450	TCHH	protein_coding	1.579	2.987	2.987	-0.394336	0.00090192	Up
ENSG00000204624	DISP3	protein_coding	1.579	2.988	2.988	-0.637892	0.00095152	Up
ENSG00000251023	AC114980.1	lncRNA	1.578	2.986	2.986	-1.31548	0.0049875	Up
ENSG00000131831	RAI2	protein_coding	1.577	2.983	2.983	0.779311	9.4658e-06	Up
ENSG00000277399	GPR179	protein_coding	1.576	2.981	2.981	-0.265475	0.0002724	Up
ENSG00000258884	LINC02321	lncRNA	1.574	2.978	2.978	-0.458121	0.00081419	Up
ENSG00000163576	EFHB	protein_coding	1.574	2.978	2.978	-0.703209	0.0013811	Up
ENSG00000143502	SUSD4	protein_coding	1.573	2.975	2.975	1.50922	4.7716e-7	Up
ENSG00000255823	MTRNR2L8	protein_coding	1.572	2.973	2.973	-0.866525	0.011418	Up
ENSG00000234492	RPL34-AS1	lncRNA	1.571	2.972	2.972	-1.17064	0.003849	Up
ENSG00000118307	CASC1	protein_coding	1.571	2.972	2.972	0.0618348	0.00014278	Up
ENSG00000256232	LINC02387	lncRNA	1.57	2.968	2.968	0.367988	3.5927e-05	Up
ENSG00000170379	TCAF2	protein_coding	1.567	2.964	2.964	1.4224	4.589e-7	Up
ENSG00000080166	DCT	protein_coding	1.561	2.95	2.95	1.14735	2.1882e-06	Up
ENSG00000277200	AC005696.4	lncRNA	1.559	2.946	2.946	0.383845	2.4535e-05	Up
ENSG00000138823	MTTP	protein_coding	1.558	2.945	2.945	-0.184567	0.00079079	Up
ENSG00000101670	LIPG	protein_coding	1.558	2.944	2.944	-0.867945	0.0075232	Up
ENSG00000262075	AC174065.1	lncRNA	1.557	2.941	2.941	-0.065291	0.00032033	Up
ENSG00000109956	B3GAT1	protein_coding	1.557	2.943	2.943	0.948016	3.565e-05	Up
ENSG00000267121	AC008105.3	lncRNA	1.552	2.933	2.933	1.31455	2.0333e-06	Up
ENSG00000184786	TCTE3	protein_coding	1.55	2.929	2.929	3.51621	9.7755e-9	Up
ENSG00000170214	ADRA1B	protein_coding	1.55	2.929	2.929	0.31297	5.1308e-05	Up
ENSG00000137801	THBS1	protein_coding	1.548	2.925	2.925	-0.515099	0.00078099	Up
ENSG00000124507	PACSIN1	protein_coding	1.547	2.923	2.923	1.06182	4.8672e-06	Up
ENSG00000178401	DNAJC22	protein_coding	1.545	2.919	2.919	3.47885	3.6963e-10	Up
ENSG00000232650	LINC01780	lncRNA	1.543	2.915	2.915	-1.18667	0.015319	Up
ENSG00000196406	SPANXD	protein_coding	1.542	2.913	2.913	-0.495791	0.0010461	Up
ENSG00000267498	AC007786.1	lncRNA	1.54	2.908	2.908	-1.55468	0.0055521	Up
ENSG00000176171	BNIP3	protein_coding	1.54	2.909	2.909	7.43938	1.1322e-13	Up
ENSG00000153404	PLEKHG4B	protein_coding	1.538	2.905	2.905	0.0166305	9.5179e-05	Up
ENSG00000131845	ZNF304	protein_coding	1.535	2.898	2.898	1.42894	1.6922e-06	Up
ENSG00000253746	AC091182.2	lncRNA	1.533	2.894	2.894	0.201416	0.00021256	Up
ENSG00000104953	TLE6	protein_coding	1.533	2.894	2.894	1.82085	1.3887e-7	Up
ENSG00000275056	AC020663.3	lncRNA	1.532	2.892	2.892	-0.713234	0.002372	Up
ENSG00000159625	DRC7	protein_coding	1.531	2.89	2.89	-0.759139	0.0016223	Up
ENSG00000237499	AL357060.1	lncRNA	1.53	2.887	2.887	-0.867494	0.0027281	Up
ENSG00000229021	AL450992.1	lncRNA	1.53	2.889	2.889	-1.13967	0.0049944	Up
ENSG00000168209	DDIT4	protein_coding	1.53	2.889	2.889	8.11347	3.39e-13	Up
ENSG00000183691	NOG	protein_coding	1.53	2.889	2.889	5.23229	8.3799e-11	Up
ENSG00000140538	NTRK3	protein_coding	1.53	2.887	2.887	-0.714058	0.0047096	Up
ENSG00000112175	BMP5	protein_coding	1.529	2.886	2.886	0.016936	0.00010274	Up
ENSG00000087494	PTHLH	protein_coding	1.528	2.883	2.883	0.733872	1.0437e-05	Up
ENSG00000272870	AC097534.2	lncRNA	1.526	2.879	2.879	3.44366	1.7933e-10	Up
ENSG00000196967	ZNF585A	protein_coding	1.525	2.878	2.878	2.54061	1.3321e-8	Up
ENSG00000266473	AC007448.3	lncRNA	1.524	2.876	2.876	-0.170648	0.00023556	Up
ENSG00000117318	ID3	protein_coding	1.521	2.871	2.871	6.88424	3.7167e-13	Up
ENSG00000130433	CACNG6	protein_coding	1.521	2.869	2.869	0.037185	0.00020002	Up
ENSG00000100604	CHGA	protein_coding	1.521	2.87	2.87	0.568675	0.00023856	Up
ENSG00000119888	EPCAM	protein_coding	1.518	2.864	2.864	1.03305	1.2491e-05	Up
ENSG00000154783	FGD5	protein_coding	1.513	2.855	2.855	0.264447	0.0002501	Up
ENSG00000175793	SFN	protein_coding	1.513	2.854	2.854	0.00210516	0.00032612	Up
ENSG00000267577	AC010327.3	lncRNA	1.51	2.848	2.848	-0.878727	0.0012851	Up
ENSG00000261173	AC018845.3	lncRNA	1.51	2.848	2.848	-1.08017	0.0022768	Up
ENSG00000249388	AC023794.3	lncRNA	1.51	2.848	2.848	-0.969348	0.0037396	Up
ENSG00000143199	ADCY10	protein_coding	1.51	2.848	2.848	0.292549	5.9734e-05	Up
ENSG00000075429	CACNG5	protein_coding	1.508	2.844	2.844	-0.782218	0.0019752	Up
ENSG00000276505	AP000892.2	lncRNA	1.506	2.84	2.84	-1.24891	0.0059663	Up
ENSG00000158406	HIST1H4H	protein_coding	1.506	2.84	2.84	-0.747442	0.0024631	Up
ENSG00000259921	AC022819.1	lncRNA	1.505	2.839	2.839	-0.983207	0.0019261	Up
ENSG00000214652	ZNF727	protein_coding	1.505	2.839	2.839	-0.0443645	0.00012623	Up
ENSG00000214193	SH3D21	protein_coding	1.504	2.836	2.836	4.06415	6.8869e-11	Up
ENSG00000132518	GUCY2D	protein_coding	1.504	2.835	2.835	-1.31516	0.0039578	Up
ENSG00000253161	LINC01605	lncRNA	1.502	2.833	2.833	2.40022	3.2598e-8	Up
ENSG00000028137	TNFRSF1B	protein_coding	1.501	2.829	2.829	-1.09607	0.013184	Up
ENSG00000146038	DCDC2	protein_coding	1.501	2.831	2.831	-1.29883	0.017459	Up
ENSG00000272468	AL021807.1	lncRNA	1.499	2.827	2.827	-0.384401	0.00054265	Up
ENSG00000172183	ISG20	protein_coding	1.499	2.826	2.826	0.896403	7.3769e-05	Up
ENSG00000275367	AC092111.1	lncRNA	1.498	2.825	2.825	-1.11112	0.014038	Up
ENSG00000182379	NXPH4	protein_coding	1.497	2.822	2.822	5.04769	7.0741e-12	Up
ENSG00000172687	ZNF738	protein_coding	1.497	2.823	2.823	2.69072	7.2721e-8	Up
ENSG00000245680	ZNF585B	protein_coding	1.497	2.823	2.823	1.83151	6.7075e-7	Up
ENSG00000166148	AVPR1A	protein_coding	1.497	2.823	2.823	-0.200667	0.0004817	Up
ENSG00000203650	LINC01285	lncRNA	1.496	2.82	2.82	1.96737	2.0074e-7	Up
ENSG00000203876	ADD3-AS1	lncRNA	1.495	2.818	2.818	-0.524805	0.0018242	Up
ENSG00000283930	AL117339.5	protein_coding	1.495	2.819	2.819	-0.780616	0.015149	Up
ENSG00000261634	AC026992.2	lncRNA	1.493	2.816	2.816	0.30296	7.9307e-05	Up
ENSG00000177791	MYOZ1	protein_coding	1.492	2.814	2.814	-0.626588	0.0044458	Up
ENSG00000272046	AL445647.1	lncRNA	1.49	2.809	2.809	0.52945	2.954e-05	Up
ENSG00000266947	AC022916.1	lncRNA	1.49	2.81	2.81	0.636225	3.6156e-05	Up
ENSG00000140961	OSGIN1	protein_coding	1.49	2.809	2.809	0.705004	1.2687e-05	Up
ENSG00000229422	AL512625.2	lncRNA	1.489	2.808	2.808	1.01532	6.1066e-06	Up
ENSG00000167614	TTYH1	protein_coding	1.488	2.805	2.805	-0.691369	0.00078496	Up
ENSG00000215374	FAM66B	lncRNA	1.487	2.803	2.803	-0.467227	0.0032647	Up
ENSG00000267454	ZNF582-AS1	lncRNA	1.486	2.802	2.802	-0.916832	0.0055474	Up
ENSG00000182459	TEX19	protein_coding	1.486	2.802	2.802	2.61324	9.5269e-9	Up
ENSG00000254369	HOXA-AS3	lncRNA	1.485	2.799	2.799	1.51358	1.695e-06	Up
ENSG00000174939	ASPHD1	protein_coding	1.484	2.797	2.797	2.37884	4.7766e-8	Up
ENSG00000105136	ZNF419	protein_coding	1.483	2.796	2.796	2.09121	5.4133e-7	Up
ENSG00000148057	IDNK	protein_coding	1.482	2.792	2.792	-0.930161	0.0019648	Up
ENSG00000185664	PMEL	protein_coding	1.48	2.789	2.789	2.28776	6.2803e-06	Up
ENSG00000181885	CLDN7	protein_coding	1.479	2.788	2.788	0.937268	9.5467e-06	Up
ENSG00000261366	MANEA-DT	lncRNA	1.478	2.785	2.785	0.305346	4.872e-05	Up
ENSG00000095303	PTGS1	protein_coding	1.478	2.785	2.785	-0.867162	0.0029879	Up
ENSG00000170786	SDR16C5	protein_coding	1.477	2.784	2.784	-0.95687	0.002669	Up
ENSG00000237440	AC008554.1	protein_coding	1.476	2.782	2.782	0.639929	5.4623e-05	Up
ENSG00000205838	TTC23L	protein_coding	1.475	2.781	2.781	-0.544109	0.0009032	Up
ENSG00000183317	EPHA10	protein_coding	1.474	2.779	2.779	1.27687	4.0684e-06	Up
ENSG00000159176	CSRP1	protein_coding	1.474	2.778	2.778	0.450065	7.2721e-05	Up
ENSG00000276744	AC105137.2	lncRNA	1.473	2.777	2.777	-0.154081	0.00023232	Up
ENSG00000246339	EXTL3-AS1	lncRNA	1.472	2.774	2.774	1.07352	6.5748e-06	Up
ENSG00000236194	AC099811.1	lncRNA	1.472	2.775	2.775	-1.24858	0.0058233	Up
ENSG00000178033	CALHM5	protein_coding	1.472	2.775	2.775	-0.290186	0.0020389	Up
ENSG00000198538	ZNF28	protein_coding	1.47	2.77	2.77	0.950157	1.7081e-05	Up
ENSG00000008517	IL32	protein_coding	1.468	2.767	2.767	-0.359786	0.0026613	Up
ENSG00000275613	AC243830.1	lncRNA	1.467	2.765	2.765	-1.31528	0.010521	Up
ENSG00000133636	NTS	protein_coding	1.466	2.762	2.762	0.6968	1.4968e-05	Up
ENSG00000111859	NEDD9	protein_coding	1.465	2.761	2.761	0.654181	3.0564e-05	Up
ENSG00000255328	AC136475.5	lncRNA	1.464	2.758	2.758	-1.38468	0.010063	Up
ENSG00000272810	U91328.3	lncRNA	1.463	2.756	2.756	-0.854396	0.0027525	Up
ENSG00000169306	IL1RAPL1	protein_coding	1.463	2.758	2.758	-0.713437	0.0014667	Up
ENSG00000272735	AC007881.3	lncRNA	1.462	2.755	2.755	-0.689873	0.001232	Up
ENSG00000132688	NES	protein_coding	1.462	2.754	2.754	3.5254	8.0762e-10	Up
ENSG00000137440	FGFBP1	protein_coding	1.461	2.752	2.752	1.09081	4.7807e-05	Up
ENSG00000275765	AC091982.3	lncRNA	1.46	2.751	2.751	0.766367	2.0426e-05	Up
ENSG00000213062	AL021068.1	lncRNA	1.46	2.752	2.752	0.394796	3.716e-05	Up
ENSG00000254577	AC087276.1	lncRNA	1.459	2.748	2.748	-1.05166	0.0027794	Up
ENSG00000272663	AC093635.1	lncRNA	1.458	2.748	2.748	-1.28084	0.0037199	Up
ENSG00000147872	PLIN2	protein_coding	1.455	2.741	2.741	5.31026	1.2469e-12	Up
ENSG00000103184	SEC14L5	protein_coding	1.452	2.736	2.736	-1.10967	0.0043472	Up
ENSG00000135144	DTX1	protein_coding	1.449	2.73	2.73	0.540971	4.5682e-05	Up
ENSG00000274184	AC011815.2	lncRNA	1.448	2.729	2.729	-0.680381	0.001439	Up
ENSG00000225880	LINC00115	lncRNA	1.446	2.724	2.724	1.75178	5.6961e-7	Up
ENSG00000270019	AC110769.2	lncRNA	1.446	2.725	2.725	-1.33152	0.0081182	Up
ENSG00000269951	AC090181.2	lncRNA	1.445	2.722	2.722	1.45877	1.1296e-06	Up
ENSG00000272812	AC004908.2	lncRNA	1.444	2.721	2.721	0.893886	4.2764e-05	Up
ENSG00000197016	ZNF470	protein_coding	1.444	2.721	2.721	1.21955	4.271e-06	Up
ENSG00000162772	ATF3	protein_coding	1.441	2.715	2.715	7.91763	1.8022e-11	Up
ENSG00000173267	SNCG	protein_coding	1.44	2.713	2.713	3.10387	2.672e-9	Up
ENSG00000136167	LCP1	protein_coding	1.44	2.714	2.714	1.33285	6.7648e-06	Up
ENSG00000169499	PLEKHA2	protein_coding	1.439	2.711	2.711	3.52445	1.2707e-9	Up
ENSG00000215915	ATAD3C	protein_coding	1.439	2.712	2.712	-0.554813	0.000707	Up
ENSG00000257178	AC103702.1	lncRNA	1.437	2.708	2.708	-0.594928	0.0012029	Up
ENSG00000166428	PLD4	protein_coding	1.436	2.705	2.705	-1.282	0.0066289	Up
ENSG00000274993	AC254629.1	lncRNA	1.435	2.704	2.704	-0.466149	0.0026747	Up
ENSG00000165591	FAAH2	protein_coding	1.432	2.698	2.698	-0.854909	0.0041545	Up
ENSG00000163497	FEV	protein_coding	1.431	2.696	2.696	-0.879526	0.0023043	Up
ENSG00000269959	SPACA6P-AS	lncRNA	1.427	2.689	2.689	-0.956557	0.0034547	Up
ENSG00000270332	SMC2-AS1	lncRNA	1.422	2.68	2.68	1.43135	3.3617e-06	Up
ENSG00000274363	AC087742.1	lncRNA	1.421	2.678	2.678	0.00959855	0.00027965	Up
ENSG00000241163	LINC00877	lncRNA	1.421	2.678	2.678	-1.34996	0.018801	Up
ENSG00000110324	IL10RA	protein_coding	1.421	2.678	2.678	1.23635	7.5717e-06	Up
ENSG00000162344	FGF19	protein_coding	1.421	2.678	2.678	-0.125766	0.0010073	Up
ENSG00000177181	RIMKLA	protein_coding	1.42	2.676	2.676	3.43658	6.2152e-10	Up
ENSG00000118640	VAMP8	protein_coding	1.419	2.674	2.674	1.94371	9.2416e-7	Up
ENSG00000010671	BTK	protein_coding	1.419	2.675	2.675	0.235698	0.00010986	Up
ENSG00000174950	CD164L2	protein_coding	1.416	2.669	2.669	-0.411814	0.00046441	Up
ENSG00000213967	ZNF726	protein_coding	1.415	2.667	2.667	0.127632	0.00012846	Up
ENSG00000106034	CPED1	protein_coding	1.411	2.658	2.658	0.175837	0.00021252	Up
ENSG00000169129	AFAP1L2	protein_coding	1.41	2.658	2.658	2.78583	1.1141e-8	Up
ENSG00000227954	TARID	lncRNA	1.409	2.655	2.655	-0.0943518	0.00049219	Up
ENSG00000214870	AC004540.1	lncRNA	1.408	2.654	2.654	0.403825	8.7861e-05	Up
ENSG00000130812	ANGPTL6	protein_coding	1.408	2.653	2.653	0.0161519	0.00023525	Up
ENSG00000136883	KIF12	protein_coding	1.406	2.649	2.649	2.27371	1.1011e-7	Up
ENSG00000198502	HLA-DRB5	protein_coding	1.405	2.648	2.648	1.96894	3.2854e-06	Up
ENSG00000229611	AL354707.2	lncRNA	1.404	2.647	2.647	0.107441	0.00030674	Up
ENSG00000136404	TM6SF1	protein_coding	1.404	2.646	2.646	0.407715	0.00025631	Up
ENSG00000135218	CD36	protein_coding	1.404	2.646	2.646	-1.18569	0.010194	Up
ENSG00000149564	ESAM	protein_coding	1.403	2.645	2.645	0.181632	0.00015601	Up
ENSG00000168398	BDKRB2	protein_coding	1.402	2.642	2.642	0.155837	0.0015487	Up
ENSG00000260526	AC109347.1	lncRNA	1.401	2.64	2.64	1.58124	2.6522e-06	Up
ENSG00000163659	TIPARP	protein_coding	1.4	2.638	2.638	5.13219	4.1124e-12	Up
ENSG00000224729	PCOLCE-AS1	lncRNA	1.399	2.637	2.637	3.3204	1.0566e-9	Up
ENSG00000101463	SYNDIG1	protein_coding	1.399	2.636	2.636	-0.818235	0.0043971	Up
ENSG00000230699	AL645608.2	lncRNA	1.398	2.635	2.635	1.95849	3.8448e-7	Up
ENSG00000173805	HAP1	protein_coding	1.398	2.636	2.636	3.82809	4.4401e-10	Up
ENSG00000196466	ZNF799	protein_coding	1.398	2.635	2.635	0.479248	5.8408e-05	Up
ENSG00000206344	HCG27	lncRNA	1.397	2.634	2.634	0.583403	3.0773e-05	Up
ENSG00000272459	AC139795.3	lncRNA	1.397	2.633	2.633	-0.747567	0.0024296	Up
ENSG00000185269	NOTUM	protein_coding	1.395	2.631	2.631	1.95358	6.6547e-7	Up
ENSG00000276524	AC010999.2	lncRNA	1.394	2.628	2.628	0.275955	5.9272e-05	Up
ENSG00000119411	BSPRY	protein_coding	1.394	2.628	2.628	1.86583	4.5357e-7	Up
ENSG00000107968	MAP3K8	protein_coding	1.393	2.627	2.627	2.35408	1.2591e-7	Up
ENSG00000149131	SERPING1	protein_coding	1.393	2.626	2.626	2.1048	1.9745e-7	Up
ENSG00000100298	APOBEC3H	protein_coding	1.391	2.623	2.623	-0.233662	0.0011089	Up
ENSG00000243083	LINC00870	lncRNA	1.389	2.619	2.619	-0.410759	0.00074133	Up
ENSG00000185247	MAGEA11	protein_coding	1.389	2.619	2.619	3.08585	4.2679e-9	Up
ENSG00000091536	MYO15A	protein_coding	1.388	2.618	2.618	1.14556	7.3246e-06	Up
ENSG00000100362	PVALB	protein_coding	1.387	2.615	2.615	-0.257022	0.0004481	Up
ENSG00000130045	NXNL2	protein_coding	1.386	2.614	2.614	-0.504052	0.001166	Up
ENSG00000253878	AC087752.3	lncRNA	1.384	2.61	2.61	0.546109	0.00033032	Up
ENSG00000180573	HIST1H2AC	protein_coding	1.383	2.609	2.609	2.44164	9.3433e-8	Up
ENSG00000088827	SIGLEC1	protein_coding	1.383	2.608	2.608	-0.879966	0.0082166	Up
ENSG00000277186	AC131212.1	lncRNA	1.382	2.607	2.607	-1.0808	0.0070978	Up
ENSG00000159640	ACE	protein_coding	1.382	2.606	2.606	1.64324	1.9133e-06	Up
ENSG00000270419	CAHM	lncRNA	1.381	2.605	2.605	1.07927	3.1718e-05	Up
ENSG00000274976	AC087588.2	lncRNA	1.38	2.602	2.602	-1.18556	0.0055018	Up
ENSG00000261226	AC092384.3	lncRNA	1.379	2.601	2.601	0.955924	9.2589e-06	Up
ENSG00000228549	BX284668.2	lncRNA	1.379	2.601	2.601	-0.290617	0.0013842	Up
ENSG00000166780	C16orf45	protein_coding	1.378	2.598	2.598	0.913444	0.00010211	Up
ENSG00000159784	FAM131B	protein_coding	1.376	2.595	2.595	2.266	7.4056e-8	Up
ENSG00000233901	LINC01503	lncRNA	1.374	2.592	2.592	-1.26492	0.0072662	Up
ENSG00000166924	NYAP1	protein_coding	1.374	2.591	2.591	1.8809	4.7474e-7	Up
ENSG00000168386	FILIP1L	protein_coding	1.374	2.592	2.592	-0.233816	0.0051074	Up
ENSG00000261360	AC010491.1	lncRNA	1.373	2.591	2.591	-0.891357	0.0020849	Up
ENSG00000178538	CA8	protein_coding	1.373	2.591	2.591	5.54263	1.1949e-12	Up
ENSG00000198576	ARC	protein_coding	1.373	2.59	2.59	2.65868	5.5665e-8	Up
ENSG00000160678	S100A1	protein_coding	1.373	2.59	2.59	-0.411878	0.0021618	Up
ENSG00000171786	NHLH1	protein_coding	1.37	2.584	2.584	-0.332802	0.0023759	Up
ENSG00000261324	AC010168.2	lncRNA	1.366	2.577	2.577	0.646051	3.0061e-05	Up
ENSG00000164949	GEM	protein_coding	1.366	2.578	2.578	3.77856	1.3832e-9	Up
ENSG00000172602	RND1	protein_coding	1.365	2.576	2.576	1.48014	2.6728e-06	Up
ENSG00000235831	BHLHE40-AS1	lncRNA	1.364	2.574	2.574	0.907644	1.7425e-05	Up
ENSG00000273209	AC069148.1	lncRNA	1.364	2.573	2.573	0.270858	8.0575e-05	Up
ENSG00000240996	AL157400.4	lncRNA	1.364	2.574	2.574	0.089419	0.00036171	Up
ENSG00000227838	AL121885.2	lncRNA	1.363	2.571	2.571	-0.102311	0.00049516	Up
ENSG00000052344	PRSS8	protein_coding	1.363	2.572	2.572	-0.0883032	0.00070228	Up
ENSG00000173221	GLRX	protein_coding	1.362	2.57	2.57	4.97208	1.6348e-10	Up
ENSG00000172748	ZNF596	protein_coding	1.362	2.571	2.571	0.449942	0.00046518	Up
ENSG00000113073	SLC4A9	protein_coding	1.362	2.571	2.571	0.0643108	0.00052065	Up
ENSG00000278916	CEP83-DT	lncRNA	1.361	2.568	2.568	1.50644	2.2433e-05	Up
ENSG00000143632	ACTA1	protein_coding	1.361	2.569	2.569	-0.265656	0.001817	Up
ENSG00000196735	HLA-DQA1	protein_coding	1.36	2.566	2.566	-0.725567	0.0063981	Up
ENSG00000160207	HSF2BP	protein_coding	1.359	2.564	2.564	-0.496409	0.0077885	Up
ENSG00000276564	AC130650.2	lncRNA	1.358	2.563	2.563	0.570435	7.3395e-05	Up
ENSG00000136960	ENPP2	protein_coding	1.358	2.563	2.563	3.37939	1.5693e-8	Up
ENSG00000156587	UBE2L6	protein_coding	1.358	2.564	2.564	2.78833	4.8523e-8	Up
ENSG00000268584	AC073389.1	lncRNA	1.357	2.562	2.562	-0.257097	0.00075612	Up
ENSG00000146005	PSD2	protein_coding	1.357	2.562	2.562	-0.66907	0.0031284	Up
ENSG00000239569	KMT2E-AS1	lncRNA	1.355	2.557	2.557	2.39938	1.35e-7	Up
ENSG00000187902	SHISA7	protein_coding	1.354	2.557	2.557	-0.969974	0.011953	Up
ENSG00000184678	HIST2H2BE	protein_coding	1.353	2.554	2.554	4.55182	2.3403e-9	Up
ENSG00000273002	AL355388.2	lncRNA	1.351	2.551	2.551	0.792894	5.0976e-05	Up
ENSG00000238260	AL513320.1	lncRNA	1.351	2.551	2.551	-0.411583	0.00099757	Up
ENSG00000175592	FOSL1	protein_coding	1.351	2.55	2.55	-0.18787	0.010119	Up
ENSG00000269038	AP001462.1	lncRNA	1.35	2.549	2.549	-0.6159	0.0019562	Up
ENSG00000100292	HMOX1	protein_coding	1.35	2.549	2.549	6.04114	4.0776e-12	Up
ENSG00000273888	FRMD6-AS1	lncRNA	1.349	2.547	2.547	-0.324029	0.0011424	Up
ENSG00000186952	TMEM232	protein_coding	1.347	2.544	2.544	-0.91745	0.0040506	Up
ENSG00000271387	AL445228.2	lncRNA	1.346	2.543	2.543	0.500672	7.2721e-05	Up
ENSG00000163131	CTSS	protein_coding	1.346	2.542	2.542	-0.98395	0.0082871	Up
ENSG00000117281	CD160	protein_coding	1.344	2.539	2.539	-0.853854	0.003649	Up
ENSG00000163701	IL17RE	protein_coding	1.344	2.538	2.538	-0.819122	0.010513	Up
ENSG00000102230	PCYT1B	protein_coding	1.34	2.531	2.531	1.9653	9.9742e-7	Up
ENSG00000118523	CCN2	protein_coding	1.339	2.53	2.53	2.42606	9.7188e-8	Up
ENSG00000273759	AL117379.1	lncRNA	1.338	2.528	2.528	1.39658	4.659e-05	Up
ENSG00000247675	LRP4-AS1	lncRNA	1.338	2.527	2.527	0.597189	8.1427e-05	Up
ENSG00000253730	AC015909.2	lncRNA	1.338	2.528	2.528	0.287136	0.00012524	Up
ENSG00000282851	BISPR	lncRNA	1.338	2.528	2.528	-0.265183	0.0026186	Up
ENSG00000167964	RAB26	protein_coding	1.338	2.528	2.528	2.88328	1.2215e-8	Up
ENSG00000106031	HOXA13	protein_coding	1.336	2.524	2.524	6.37621	1.7465e-12	Up
ENSG00000246308	AC116535.1	lncRNA	1.335	2.523	2.523	-1.28147	0.019821	Up
ENSG00000132357	CARD6	protein_coding	1.334	2.522	2.522	0.280119	0.0002523	Up
ENSG00000196172	ZNF681	protein_coding	1.333	2.519	2.519	0.356092	0.00032026	Up
ENSG00000242866	STRC	protein_coding	1.331	2.515	2.515	-1.02406	0.0057584	Up
ENSG00000256577	AC007406.4	lncRNA	1.329	2.512	2.512	-0.669173	0.001992	Up
ENSG00000249502	AC006160.1	lncRNA	1.329	2.512	2.512	-0.956757	0.0082166	Up
ENSG00000167676	PLIN4	protein_coding	1.327	2.509	2.509	0.340842	0.00033726	Up
ENSG00000159409	CELF3	protein_coding	1.326	2.508	2.508	-0.307487	0.0028542	Up
ENSG00000183186	C2CD4C	protein_coding	1.325	2.506	2.506	1.77175	1.6593e-06	Up
ENSG00000254165	AC090739.1	lncRNA	1.322	2.5	2.5	-1.01097	0.014654	Up
ENSG00000123999	INHA	protein_coding	1.322	2.5	2.5	0.838251	2.1994e-05	Up
ENSG00000179761	PIPOX	protein_coding	1.322	2.5	2.5	-0.087492	0.00049328	Up
ENSG00000126950	TMEM35A	protein_coding	1.321	2.499	2.499	-0.177519	0.001021	Up
ENSG00000235033	AL590999.1	lncRNA	1.319	2.495	2.495	-0.575172	0.0034659	Up
ENSG00000168280	KIF5C	protein_coding	1.318	2.493	2.493	4.25091	5.1724e-10	Up
ENSG00000136826	KLF4	protein_coding	1.318	2.493	2.493	3.63948	2.0728e-9	Up
ENSG00000242732	RTL5	protein_coding	1.318	2.493	2.493	2.43211	3.3689e-7	Up
ENSG00000171236	LRG1	protein_coding	1.318	2.493	2.493	-0.957393	0.018006	Up
ENSG00000187601	MAGEH1	protein_coding	1.316	2.489	2.489	-0.574559	0.0019657	Up
ENSG00000145623	OSMR	protein_coding	1.316	2.489	2.489	-1.24855	0.008952	Up
ENSG00000185022	MAFF	protein_coding	1.315	2.488	2.488	2.77839	2.7359e-8	Up
ENSG00000155011	DKK2	protein_coding	1.315	2.488	2.488	0.315368	0.00032612	Up
ENSG00000107249	GLIS3	protein_coding	1.315	2.489	2.489	-0.554391	0.0022612	Up
ENSG00000104967	NOVA2	protein_coding	1.313	2.485	2.485	2.45905	1.6076e-7	Up
ENSG00000130656	HBZ	protein_coding	1.313	2.485	2.485	-1.10844	0.011506	Up
ENSG00000160801	PTH1R	protein_coding	1.312	2.483	2.483	1.6451	1.2954e-06	Up
ENSG00000095370	SH2D3C	protein_coding	1.312	2.482	2.482	1.03059	3.3261e-05	Up
ENSG00000272973	AP000350.5	lncRNA	1.311	2.48	2.48	1.34064	6.0597e-06	Up
ENSG00000164136	IL15	protein_coding	1.309	2.478	2.478	0.210503	0.00066267	Up
ENSG00000114854	TNNC1	protein_coding	1.309	2.478	2.478	-0.514483	0.0012187	Up
ENSG00000100218	RSPH14	protein_coding	1.308	2.477	2.477	0.592198	6.0894e-05	Up
ENSG00000171450	CDK5R2	protein_coding	1.308	2.477	2.477	-0.162726	0.00066541	Up
ENSG00000186026	ZNF284	protein_coding	1.307	2.474	2.474	-0.723967	0.0030638	Up
ENSG00000136371	MTHFS	protein_coding	1.307	2.475	2.475	-1.34974	0.017557	Up
ENSG00000273723	AL139089.1	lncRNA	1.306	2.473	2.473	1.73751	3.0814e-06	Up
ENSG00000235092	ID2-AS1	lncRNA	1.306	2.473	2.473	0.0171697	0.00023719	Up
ENSG00000114023	FAM162A	protein_coding	1.306	2.473	2.473	7.14844	1.0199e-12	Up
ENSG00000158125	XDH	protein_coding	1.305	2.472	2.472	-0.917682	0.0092507	Up
ENSG00000272341	AL137003.2	lncRNA	1.304	2.469	2.469	3.41538	7.6331e-9	Up
ENSG00000099869	IGF2-AS	lncRNA	1.304	2.468	2.468	-1.43857	0.019302	Up
ENSG00000234740	AL162386.2	lncRNA	1.303	2.467	2.467	-1.23286	0.016491	Up
ENSG00000188452	CERKL	protein_coding	1.303	2.468	2.468	-0.806356	0.0075094	Up
ENSG00000197245	FAM110D	protein_coding	1.302	2.465	2.465	-1.24951	0.03393	Up
ENSG00000187837	HIST1H1C	protein_coding	1.301	2.464	2.464	4.13836	8.3992e-10	Up
ENSG00000276180	HIST1H4I	protein_coding	1.299	2.461	2.461	0.363709	0.00022659	Up
ENSG00000125740	FOSB	protein_coding	1.298	2.458	2.458	1.83137	1.7371e-06	Up
ENSG00000169403	PTAFR	protein_coding	1.298	2.459	2.459	-0.133773	0.0022768	Up
ENSG00000006757	PNPLA4	protein_coding	1.296	2.455	2.455	0.746029	0.00012053	Up
ENSG00000145864	GABRB2	protein_coding	1.295	2.454	2.454	-0.679635	0.010796	Up
ENSG00000163359	COL6A3	protein_coding	1.294	2.453	2.453	0.356101	0.00083437	Up
ENSG00000169181	GSG1L	protein_coding	1.294	2.452	2.452	-0.724918	0.0034807	Up
ENSG00000262001	DLGAP1-AS2	lncRNA	1.293	2.45	2.45	-0.564417	0.0032681	Up
ENSG00000224358	TMCO1-AS1	lncRNA	1.292	2.449	2.449	0.199128	0.00055608	Up
ENSG00000179750	APOBEC3B	protein_coding	1.292	2.448	2.448	2.84497	3.4365e-7	Up
ENSG00000196154	S100A4	protein_coding	1.292	2.448	2.448	1.82155	4.5954e-06	Up
ENSG00000278467	AC138393.3	lncRNA	1.289	2.444	2.444	-0.942926	0.0046137	Up
ENSG00000204086	RPA4	protein_coding	1.288	2.441	2.441	2.75028	6.7236e-8	Up
ENSG00000182511	FES	protein_coding	1.288	2.441	2.441	-0.477439	0.003566	Up
ENSG00000251369	ZNF550	protein_coding	1.287	2.44	2.44	2.92398	1.0484e-7	Up
ENSG00000041353	RAB27B	protein_coding	1.287	2.441	2.441	0.631596	0.00020912	Up
ENSG00000205293	LINC01602	lncRNA	1.286	2.438	2.438	2.2643	3.5367e-7	Up
ENSG00000267011	AC011498.1	lncRNA	1.286	2.438	2.438	-1.18539	0.026235	Up
ENSG00000276075	AC027682.6	lncRNA	1.285	2.437	2.437	-0.516489	0.010121	Up
ENSG00000162576	MXRA8	protein_coding	1.284	2.434	2.434	0.454045	0.00021579	Up
ENSG00000115919	KYNU	protein_coding	1.284	2.434	2.434	-1.21779	0.026233	Up
ENSG00000277159	AL139384.2	lncRNA	1.281	2.43	2.43	-0.515521	0.002247	Up
ENSG00000139209	SLC38A4	protein_coding	1.28	2.428	2.428	-0.95623	0.0090442	Up
ENSG00000187994	RINL	protein_coding	1.279	2.427	2.427	-0.525271	0.0024174	Up
ENSG00000205930	C21orf62-AS1	lncRNA	1.277	2.423	2.423	0.729744	0.00015788	Up
ENSG00000159208	CIART	protein_coding	1.277	2.423	2.423	-0.0375963	0.0019129	Up
ENSG00000251259	AC004069.1	lncRNA	1.276	2.421	2.421	0.681452	5.3175e-05	Up
ENSG00000196542	SPTSSB	protein_coding	1.276	2.421	2.421	0.0822026	0.0004317	Up
ENSG00000163879	DNALI1	protein_coding	1.276	2.422	2.422	-0.124331	0.0020725	Up
ENSG00000235927	NEXN-AS1	lncRNA	1.275	2.42	2.42	-0.64803	0.0078047	Up
ENSG00000235530	AC087294.1	lncRNA	1.273	2.416	2.416	-0.162661	0.00098413	Up
ENSG00000138311	ZNF365	protein_coding	1.273	2.416	2.416	0.163721	0.00098495	Up
ENSG00000139714	MORN3	protein_coding	1.273	2.417	2.417	-0.514396	0.0026672	Up
ENSG00000240137	ERICH6-AS1	lncRNA	1.272	2.415	2.415	-0.178997	0.0031863	Up
ENSG00000069535	MAOB	protein_coding	1.272	2.415	2.415	0.298946	0.00050612	Up
ENSG00000260167	AC093249.2	lncRNA	1.271	2.413	2.413	-0.358464	0.0027689	Up
ENSG00000183647	ZNF530	protein_coding	1.271	2.414	2.414	1.45333	6.7493e-06	Up
ENSG00000225205	AC078883.1	lncRNA	1.269	2.409	2.409	0.134008	0.00071757	Up
ENSG00000198892	SHISA4	protein_coding	1.268	2.408	2.408	0.204447	0.00081843	Up
ENSG00000174059	CD34	protein_coding	1.267	2.406	2.406	-0.0177103	0.00088997	Up
ENSG00000197837	HIST4H4	protein_coding	1.267	2.407	2.407	-0.420259	0.0031671	Up
ENSG00000259495	AC016705.2	lncRNA	1.266	2.406	2.406	0.403745	0.0003872	Up
ENSG00000273064	AC017083.1	lncRNA	1.266	2.405	2.405	-0.449031	0.0049492	Up
ENSG00000240219	AL512306.2	lncRNA	1.266	2.404	2.404	-0.879632	0.014072	Up
ENSG00000166446	CDYL2	protein_coding	1.266	2.405	2.405	1.09097	0.00013845	Up
ENSG00000047644	WWC3	protein_coding	1.266	2.405	2.405	-1.0247	0.0092305	Up
ENSG00000247735	AC120114.1	lncRNA	1.265	2.403	2.403	2.24628	1.2954e-06	Up
ENSG00000170743	SYT9	protein_coding	1.265	2.403	2.403	0.302488	0.00039034	Up
ENSG00000273001	AL731533.2	lncRNA	1.264	2.401	2.401	-1.29839	0.014083	Up
ENSG00000282787	AL157888.1	lncRNA	1.264	2.402	2.402	-1.23262	0.014514	Up
ENSG00000172794	RAB37	protein_coding	1.263	2.4	2.4	-0.781801	0.0039535	Up
ENSG00000151025	GPR158	protein_coding	1.261	2.396	2.396	-1.17053	0.019238	Up
ENSG00000245522	AC026250.1	lncRNA	1.259	2.394	2.394	0.382202	0.0006629	Up
ENSG00000267226	AC104971.1	lncRNA	1.259	2.393	2.393	-0.0251052	0.0012221	Up
ENSG00000138316	ADAMTS14	protein_coding	1.259	2.394	2.394	0.302715	0.00031678	Up
ENSG00000176532	PRR15	protein_coding	1.259	2.393	2.393	-0.997137	0.011207	Up
ENSG00000235527	HIPK1-AS1	lncRNA	1.258	2.392	2.392	0.0377484	0.0013464	Up
ENSG00000273702	AC091271.1	lncRNA	1.256	2.388	2.388	1.36838	5.0572e-06	Up
ENSG00000139988	RDH12	protein_coding	1.256	2.388	2.388	-0.250868	0.020498	Up
ENSG00000203667	COX20	protein_coding	1.255	2.386	2.386	4.30415	2.0125e-10	Up
ENSG00000135437	RDH5	protein_coding	1.255	2.386	2.386	-0.841509	0.028498	Up
ENSG00000282386	AL358472.4	lncRNA	1.254	2.386	2.386	-0.23255	0.0013648	Up
ENSG00000172361	CFAP53	protein_coding	1.254	2.386	2.386	0.30198	0.0020413	Up
ENSG00000259820	AC083843.3	lncRNA	1.253	2.384	2.384	5.05355	6.2297e-10	Up
ENSG00000062370	ZNF112	protein_coding	1.253	2.384	2.384	1.01615	3.4357e-05	Up
ENSG00000228889	UBAC2-AS1	lncRNA	1.252	2.382	2.382	1.60494	9.3149e-06	Up
ENSG00000248174	LINC02268	lncRNA	1.25	2.378	2.378	0.7229	5.5024e-05	Up
ENSG00000176907	TCIM	protein_coding	1.25	2.379	2.379	2.25384	1.1207e-06	Up
ENSG00000121406	ZNF549	protein_coding	1.25	2.378	2.378	0.356107	0.00039595	Up
ENSG00000139200	PIANP	protein_coding	1.249	2.377	2.377	2.53633	1.7747e-7	Up
ENSG00000272945	AL356299.2	lncRNA	1.248	2.375	2.375	-1.09482	0.0064845	Up
ENSG00000158473	CD1D	protein_coding	1.248	2.376	2.376	1.66575	7.7924e-06	Up
ENSG00000107738	VSIR	protein_coding	1.248	2.375	2.375	0.929127	0.00026474	Up
ENSG00000174514	MFSD4A	protein_coding	1.247	2.374	2.374	1.29704	0.00021882	Up
ENSG00000235100	AL157400.3	lncRNA	1.244	2.368	2.368	-0.290349	0.0032866	Up
ENSG00000225975	LINC01534	lncRNA	1.243	2.367	2.367	0.480082	0.00017587	Up
ENSG00000129521	EGLN3	protein_coding	1.243	2.368	2.368	5.51029	2.2275e-11	Up
ENSG00000174460	ZCCHC12	protein_coding	1.243	2.367	2.367	6.8185	1.9463e-10	Up
ENSG00000198400	NTRK1	protein_coding	1.243	2.366	2.366	-0.0747515	0.0016684	Up
ENSG00000245146	MALINC1	lncRNA	1.242	2.366	2.366	1.30933	8.0797e-06	Up
ENSG00000241313	WWTR1-AS1	lncRNA	1.242	2.365	2.365	-0.6261	0.0029956	Up
ENSG00000148655	LRMDA	protein_coding	1.242	2.365	2.365	-0.476524	0.0020503	Up
ENSG00000106069	CHN2	protein_coding	1.242	2.366	2.366	-0.997034	0.0081315	Up
ENSG00000269921	AC068620.1	lncRNA	1.241	2.363	2.363	-0.658279	0.003689	Up
ENSG00000156453	PCDH1	protein_coding	1.24	2.362	2.362	2.01469	8.2388e-06	Up
ENSG00000247151	CSTF3-DT	lncRNA	1.236	2.355	2.355	-0.525187	0.0031503	Up
ENSG00000197653	DNAH10	protein_coding	1.236	2.355	2.355	0.80195	0.00024536	Up
ENSG00000111344	RASAL1	protein_coding	1.234	2.353	2.353	0.409671	0.00028572	Up
ENSG00000277170	AC012676.3	lncRNA	1.233	2.35	2.35	0.170789	0.0003408	Up
ENSG00000272438	AL645608.6	lncRNA	1.233	2.351	2.351	0.17064	0.00044972	Up
ENSG00000231187	AL356056.2	lncRNA	1.23	2.345	2.345	0.574911	0.00064646	Up
ENSG00000007350	TKTL1	protein_coding	1.23	2.345	2.345	0.587897	0.00047383	Up
ENSG00000167588	GPD1	protein_coding	1.23	2.346	2.346	-0.475852	0.010483	Up
ENSG00000204950	LRRC10B	protein_coding	1.229	2.344	2.344	-0.27303	0.0017845	Up
ENSG00000101665	SMAD7	protein_coding	1.228	2.343	2.343	4.2588	8.5022e-10	Up
ENSG00000175197	DDIT3	protein_coding	1.227	2.34	2.34	4.08948	2.982e-9	Up
ENSG00000173406	DAB1	protein_coding	1.227	2.341	2.341	1.83029	1.7948e-06	Up
ENSG00000249328	AC036214.1	lncRNA	1.225	2.337	2.337	0.270457	0.00063941	Up
ENSG00000132932	ATP8A2	protein_coding	1.225	2.337	2.337	1.02636	4.7469e-05	Up
ENSG00000105467	SYNGR4	protein_coding	1.225	2.337	2.337	-0.376798	0.0030414	Up
ENSG00000256060	TRAPPC2B	protein_coding	1.224	2.337	2.337	0.205718	0.0010605	Up
ENSG00000101222	SPEF1	protein_coding	1.224	2.335	2.335	-0.359408	0.0034541	Up
ENSG00000130822	PNCK	protein_coding	1.223	2.334	2.334	1.18369	1.8155e-05	Up
ENSG00000267216	AC020915.1	protein_coding	1.223	2.335	2.335	0.667212	0.00012551	Up
ENSG00000252690	AC105339.2	lncRNA	1.221	2.331	2.331	2.32824	8.0136e-7	Up
ENSG00000099866	MADCAM1	protein_coding	1.221	2.331	2.331	0.351891	0.00039309	Up
ENSG00000164484	TMEM200A	protein_coding	1.221	2.331	2.331	-0.878909	0.0069502	Up
ENSG00000271851	AC087501.4	lncRNA	1.22	2.329	2.329	0.410561	0.001448	Up
ENSG00000227060	LINC00629	lncRNA	1.219	2.327	2.327	0.914074	7.319e-05	Up
ENSG00000087245	MMP2	protein_coding	1.218	2.327	2.327	4.57761	1.7356e-9	Up
ENSG00000275437	AL121832.3	lncRNA	1.217	2.324	2.324	2.64018	5.7272e-7	Up
ENSG00000222020	HDAC4-AS1	lncRNA	1.217	2.325	2.325	0.894941	5.627e-05	Up
ENSG00000187135	VSTM2B	protein_coding	1.217	2.325	2.325	-0.332103	0.0020725	Up
ENSG00000197013	ZNF429	protein_coding	1.217	2.324	2.324	-0.594755	0.0038786	Up
ENSG00000172936	MYD88	protein_coding	1.217	2.325	2.325	-1.02432	0.00832	Up
ENSG00000273419	AC004877.1	lncRNA	1.216	2.324	2.324	0.00172498	0.0035556	Up
ENSG00000115738	ID2	protein_coding	1.216	2.323	2.323	8.2112	3.4232e-12	Up
ENSG00000170231	FABP6	protein_coding	1.216	2.323	2.323	-0.0168907	0.0015478	Up
ENSG00000170525	PFKFB3	protein_coding	1.215	2.322	2.322	6.54393	7.0741e-12	Up
ENSG00000134259	NGF	protein_coding	1.215	2.322	2.322	-0.818246	0.0090752	Up
ENSG00000272205	AL451050.2	lncRNA	1.214	2.32	2.32	0.363333	0.00020361	Up
ENSG00000061656	SPAG4	protein_coding	1.213	2.319	2.319	2.84864	1.0055e-7	Up
ENSG00000123407	HOXC12	protein_coding	1.213	2.317	2.317	0.0093407	0.00087582	Up
ENSG00000126583	PRKCG	protein_coding	1.212	2.316	2.316	1.88601	4.1827e-06	Up
ENSG00000205089	CCNI2	protein_coding	1.212	2.316	2.316	-0.163603	0.0022749	Up
ENSG00000251131	AC025171.3	lncRNA	1.211	2.315	2.315	0.53885	0.0010224	Up
ENSG00000124785	NRN1	protein_coding	1.21	2.313	2.313	7.12636	9.7653e-12	Up
ENSG00000121413	ZSCAN18	protein_coding	1.21	2.313	2.313	3.69326	2.5466e-9	Up
ENSG00000049089	COL9A2	protein_coding	1.209	2.311	2.311	2.573	9.0892e-7	Up
ENSG00000132205	EMILIN2	protein_coding	1.207	2.309	2.309	5.01305	1.6423e-10	Up
ENSG00000148344	PTGES	protein_coding	1.207	2.308	2.308	1.5161	5.7861e-05	Up
ENSG00000170608	FOXA3	protein_coding	1.207	2.308	2.308	0.81344	0.0002052	Up
ENSG00000237686	AL109615.3	lncRNA	1.206	2.308	2.308	0.85867	0.00018366	Up
ENSG00000145780	FEM1C	protein_coding	1.206	2.307	2.307	5.59234	1.5612e-11	Up
ENSG00000197020	ZNF100	protein_coding	1.205	2.305	2.305	1.20859	1.8271e-05	Up
ENSG00000186732	MPPED1	protein_coding	1.205	2.306	2.306	0.899637	0.00010749	Up
ENSG00000268129	AC026304.1	lncRNA	1.204	2.304	2.304	2.04366	4.653e-06	Up
ENSG00000113721	PDGFRB	protein_coding	1.203	2.302	2.302	-0.596434	0.012199	Up
ENSG00000270638	AL023806.1	lncRNA	1.202	2.3	2.3	-0.955864	0.014564	Up
ENSG00000117394	SLC2A1	protein_coding	1.202	2.301	2.301	7.00428	1.9727e-10	Up
ENSG00000183580	FBXL7	protein_coding	1.201	2.299	2.299	-1.08171	0.030865	Up
ENSG00000203684	IBA57-DT	lncRNA	1.2	2.297	2.297	0.588027	0.00013228	Up
ENSG00000231105	AL031728.1	lncRNA	1.2	2.297	2.297	-0.457017	0.0026229	Up
ENSG00000149418	ST14	protein_coding	1.2	2.298	2.298	-1.14013	0.028287	Up
ENSG00000188263	IL17REL	protein_coding	1.199	2.296	2.296	0.0943924	0.0014707	Up
ENSG00000272574	AL596325.2	lncRNA	1.197	2.293	2.293	-0.969841	0.016831	Up
ENSG00000281731	METTL14-DT	lncRNA	1.197	2.292	2.292	-1.4022	0.036233	Up
ENSG00000114270	COL7A1	protein_coding	1.196	2.291	2.291	4.03596	2.137e-9	Up
ENSG00000213782	DDX47	protein_coding	1.196	2.29	2.29	1.23487	2.5838e-05	Up
ENSG00000221923	ZNF880	protein_coding	1.194	2.287	2.287	0.879147	6.0055e-05	Up
ENSG00000234509	AP000253.1	lncRNA	1.192	2.285	2.285	-0.890638	0.011367	Up
ENSG00000213760	ATP6V1G2	protein_coding	1.192	2.285	2.285	2.13836	1.4945e-06	Up
ENSG00000154269	ENPP3	protein_coding	1.192	2.285	2.285	0.205739	0.00060134	Up
ENSG00000181652	ATG9B	protein_coding	1.191	2.283	2.283	1.86548	3.1336e-06	Up
ENSG00000260233	SSSCA1-AS1	lncRNA	1.188	2.279	2.279	1.37813	1.1862e-05	Up
ENSG00000264808	AC068025.1	lncRNA	1.188	2.279	2.279	0.731245	0.00012324	Up
ENSG00000188729	OSTN	protein_coding	1.188	2.278	2.278	3.19332	2.3291e-8	Up
ENSG00000159403	C1R	protein_coding	1.188	2.279	2.279	2.92584	1.6479e-7	Up
ENSG00000285884	AL022345.4	lncRNA	1.187	2.277	2.277	-0.192937	0.0020964	Up
ENSG00000253552	HOXA-AS2	lncRNA	1.186	2.276	2.276	3.57228	7.2842e-8	Up
ENSG00000147036	LANCL3	protein_coding	1.186	2.276	2.276	0.754119	0.00014236	Up
ENSG00000168298	HIST1H1E	protein_coding	1.186	2.275	2.275	-0.161545	0.0010555	Up
ENSG00000254812	AC067930.2	lncRNA	1.185	2.273	2.273	-0.332938	0.0025584	Up
ENSG00000067798	NAV3	protein_coding	1.185	2.274	2.274	-0.637609	0.0081296	Up
ENSG00000087074	PPP1R15A	protein_coding	1.184	2.272	2.272	6.41224	7.0741e-12	Up
ENSG00000204758	AC008429.1	lncRNA	1.183	2.27	2.27	0.561144	0.00026474	Up
ENSG00000276698	AL136295.6	lncRNA	1.183	2.27	2.27	-0.626995	0.0046407	Up
ENSG00000104765	BNIP3L	protein_coding	1.182	2.268	2.268	6.60224	8.3799e-11	Up
ENSG00000138061	CYP1B1	protein_coding	1.182	2.269	2.269	1.86142	4.8144e-06	Up
ENSG00000175106	TVP23C	protein_coding	1.182	2.269	2.269	0.878946	8.3341e-05	Up
ENSG00000124635	HIST1H2BJ	protein_coding	1.181	2.268	2.268	2.24344	1.126e-06	Up
ENSG00000142609	CFAP74	protein_coding	1.18	2.266	2.266	0.0507523	0.00085438	Up
ENSG00000229931	AL137003.1	lncRNA	1.179	2.264	2.264	0.980922	8.2127e-05	Up
ENSG00000274220	AC009163.6	lncRNA	1.178	2.262	2.262	-0.393439	0.0030759	Up
ENSG00000231439	WASIR2	lncRNA	1.177	2.261	2.261	-0.290405	0.0025507	Up
ENSG00000275198	AL512791.2	lncRNA	1.177	2.261	2.261	-0.515079	0.0033231	Up
ENSG00000235897	TM4SF19-AS1	lncRNA	1.177	2.262	2.262	-0.818378	0.010121	Up
ENSG00000222009	BTBD19	protein_coding	1.177	2.261	2.261	0.733603	0.00055229	Up
ENSG00000285219	AL591485.1	lncRNA	1.176	2.26	2.26	1.49715	1.0867e-05	Up
ENSG00000215014	AL645728.1	lncRNA	1.176	2.259	2.259	0.61082	0.00019833	Up
ENSG00000231305	AC112484.1	lncRNA	1.176	2.259	2.259	-0.148472	0.0042934	Up
ENSG00000107819	SFXN3	protein_coding	1.176	2.259	2.259	3.86113	2.6342e-9	Up
ENSG00000145700	ANKRD31	protein_coding	1.175	2.259	2.259	0.535775	0.00078778	Up
ENSG00000069812	HES2	protein_coding	1.175	2.257	2.257	-0.0898029	0.003808	Up
ENSG00000005844	ITGAL	protein_coding	1.175	2.258	2.258	-0.0745263	0.0053638	Up
ENSG00000273783	AL136040.1	lncRNA	1.174	2.257	2.257	-0.079814	0.0013997	Up
ENSG00000237950	AL357079.1	lncRNA	1.174	2.256	2.256	-0.101417	0.001545	Up
ENSG00000277662	AL354696.1	lncRNA	1.174	2.257	2.257	-0.879365	0.010174	Up
ENSG00000284719	AL033527.5	lncRNA	1.174	2.257	2.257	-1.08073	0.034665	Up
ENSG00000078814	MYH7B	protein_coding	1.174	2.256	2.256	-1.24807	0.019148	Up
ENSG00000184441	AP001062.1	lncRNA	1.173	2.256	2.256	-0.00957013	0.00071757	Up
ENSG00000273828	AL133227.1	lncRNA	1.173	2.254	2.254	-1.09498	0.015393	Up
ENSG00000154654	NCAM2	protein_coding	1.173	2.255	2.255	-0.818159	0.019474	Up
ENSG00000245498	AP000866.1	lncRNA	1.172	2.253	2.253	0.308364	0.00060447	Up
ENSG00000142606	MMEL1	protein_coding	1.172	2.253	2.253	-0.281921	0.0031249	Up
ENSG00000197776	KLHDC1	protein_coding	1.171	2.252	2.252	-0.91703	0.010112	Up
ENSG00000120149	MSX2	protein_coding	1.17	2.25	2.25	4.42918	2.85e-10	Up
ENSG00000198774	RASSF9	protein_coding	1.169	2.249	2.249	0.0217406	0.0029442	Up
ENSG00000110944	IL23A	protein_coding	1.169	2.249	2.249	-0.486316	0.010887	Up
ENSG00000277831	AL138960.1	lncRNA	1.167	2.246	2.246	-0.169164	0.0015195	Up
ENSG00000237742	AL365259.1	lncRNA	1.167	2.246	2.246	0.0232018	0.0016707	Up
ENSG00000149970	CNKSR2	protein_coding	1.167	2.246	2.246	-0.829695	0.018248	Up
ENSG00000273391	AC083880.1	lncRNA	1.166	2.243	2.243	0.885494	0.000172	Up
ENSG00000146700	SSC4D	protein_coding	1.166	2.244	2.244	1.04076	8.1053e-05	Up
ENSG00000178031	ADAMTSL1	protein_coding	1.166	2.244	2.244	0.791111	0.00014809	Up
ENSG00000188868	ZNF563	protein_coding	1.166	2.243	2.243	-0.457652	0.0083467	Up
ENSG00000026508	CD44	protein_coding	1.165	2.242	2.242	0.480018	0.00033269	Up
ENSG00000133107	TRPC4	protein_coding	1.165	2.243	2.243	0.258604	0.00091065	Up
ENSG00000253931	AC105118.1	lncRNA	1.163	2.24	2.24	0.0764071	0.0023278	Up
ENSG00000233421	LINC01783	lncRNA	1.162	2.237	2.237	-0.487533	0.01612	Up
ENSG00000175868	CALCB	protein_coding	1.162	2.238	2.238	3.78029	1.603e-8	Up
ENSG00000067840	PDZD4	protein_coding	1.161	2.236	2.236	5.15196	6.2868e-11	Up
ENSG00000104722	NEFM	protein_coding	1.161	2.236	2.236	8.85709	1.2558e-10	Up
ENSG00000196787	HIST1H2AG	protein_coding	1.161	2.237	2.237	1.77154	1.0498e-05	Up
ENSG00000271855	AC073195.1	lncRNA	1.159	2.234	2.234	0.685504	0.00016489	Up
ENSG00000138650	PCDH10	protein_coding	1.159	2.233	2.233	6.62721	1.921e-11	Up
ENSG00000086159	AQP6	protein_coding	1.159	2.233	2.233	0.169137	0.0010301	Up
ENSG00000203288	TDRKH-AS1	lncRNA	1.158	2.231	2.231	0.820797	0.00042527	Up
ENSG00000231728	TMSB15B-AS1	lncRNA	1.158	2.232	2.232	0.611007	0.00077102	Up
ENSG00000231563	AL670729.1	lncRNA	1.158	2.232	2.232	-0.496704	0.010905	Up
ENSG00000242242	NECTIN3-AS1	lncRNA	1.158	2.231	2.231	-0.956375	0.013587	Up
ENSG00000122884	P4HA1	protein_coding	1.157	2.229	2.229	7.82634	2.9915e-9	Up
ENSG00000231890	DARS-AS1	lncRNA	1.155	2.227	2.227	1.56178	7.6044e-06	Up
ENSG00000260625	AC026471.2	lncRNA	1.155	2.227	2.227	0.470561	0.0007516	Up
ENSG00000258815	AC131532.1	lncRNA	1.154	2.226	2.226	-0.477232	0.0055953	Up
ENSG00000115414	FN1	protein_coding	1.154	2.225	2.225	7.01246	4.7526e-11	Up
ENSG00000105696	TMEM59L	protein_coding	1.152	2.223	2.223	3.77645	6.6818e-9	Up
ENSG00000157103	SLC6A1	protein_coding	1.152	2.223	2.223	1.74934	4.4997e-06	Up
ENSG00000204767	INSYN2B	protein_coding	1.152	2.222	2.222	0.777514	0.00058245	Up
ENSG00000173269	MMRN2	protein_coding	1.152	2.222	2.222	-0.486341	0.0086372	Up
ENSG00000102053	ZC3H12B	protein_coding	1.151	2.221	2.221	0.139537	0.0013612	Up
ENSG00000198959	TGM2	protein_coding	1.15	2.218	2.218	1.8632	1.0125e-05	Up
ENSG00000163491	NEK10	protein_coding	1.15	2.22	2.22	1.2836	5.1959e-05	Up
ENSG00000105675	ATP4A	protein_coding	1.15	2.22	2.22	-0.124152	0.0017902	Up
ENSG00000186510	CLCNKA	protein_coding	1.149	2.217	2.217	-0.929823	0.011415	Up
ENSG00000177453	NIM1K	protein_coding	1.148	2.215	2.215	1.75142	9.2589e-06	Up
ENSG00000224842	AL161908.1	lncRNA	1.147	2.215	2.215	0.164339	0.00065086	Up
ENSG00000156463	SH3RF2	protein_coding	1.147	2.215	2.215	1.37559	7.9307e-05	Up
ENSG00000276390	AC004241.3	lncRNA	1.146	2.213	2.213	0.341667	0.00083356	Up
ENSG00000284738	AL358472.5	lncRNA	1.146	2.213	2.213	-1.43902	0.024155	Up
ENSG00000136297	MMD2	protein_coding	1.146	2.213	2.213	-0.0110619	0.0028673	Up
ENSG00000164853	UNCX	protein_coding	1.146	2.213	2.213	-0.333101	0.0036942	Up
ENSG00000122735	DNAI1	protein_coding	1.146	2.213	2.213	-0.564781	0.0078047	Up
ENSG00000259065	AC005520.2	lncRNA	1.145	2.212	2.212	-0.72419	0.0074201	Up
ENSG00000143816	WNT9A	protein_coding	1.144	2.209	2.209	1.6793	3.577e-05	Up
ENSG00000161040	FBXL13	protein_coding	1.144	2.21	2.21	-0.248967	0.004355	Up
ENSG00000167653	PSCA	protein_coding	1.144	2.209	2.209	-0.930537	0.013737	Up
ENSG00000141744	PNMT	protein_coding	1.144	2.209	2.209	-1.34957	0.028993	Up
ENSG00000206262	FOXL2NB	protein_coding	1.144	2.21	2.21	-1.29826	0.033404	Up
ENSG00000227908	AC016596.1	lncRNA	1.142	2.206	2.206	-0.475801	0.0055574	Up
ENSG00000111077	TNS2	protein_coding	1.142	2.206	2.206	1.82955	1.1791e-05	Up
ENSG00000023445	BIRC3	protein_coding	1.142	2.207	2.207	-0.0516365	0.0017103	Up
ENSG00000261120	AL133299.1	lncRNA	1.141	2.205	2.205	0.440222	0.00034232	Up
ENSG00000006283	CACNA1G	protein_coding	1.141	2.206	2.206	2.49529	5.2129e-06	Up
ENSG00000129596	CDO1	protein_coding	1.141	2.205	2.205	0.460524	0.0005263	Up
ENSG00000268403	AC132192.2	lncRNA	1.139	2.202	2.202	2.19299	2.8079e-06	Up
ENSG00000074211	PPP2R2C	protein_coding	1.138	2.2	2.2	3.82036	1.1257e-8	Up
ENSG00000163661	PTX3	protein_coding	1.138	2.201	2.201	3.73537	5.2197e-8	Up
ENSG00000198417	MT1F	protein_coding	1.138	2.201	2.201	0.89707	9.7472e-05	Up
ENSG00000227676	LINC01068	lncRNA	1.137	2.2	2.2	-1.31428	0.03663	Up
ENSG00000224965	LINC02586	lncRNA	1.136	2.197	2.197	0.25312	0.0020958	Up
ENSG00000256894	AC022509.3	lncRNA	1.135	2.196	2.196	-0.916792	0.0097514	Up
ENSG00000270182	AC004080.4	lncRNA	1.133	2.193	2.193	-1.31528	0.028092	Up
ENSG00000272715	AL157904.1	lncRNA	1.132	2.191	2.191	-0.904135	0.009251	Up
ENSG00000185507	IRF7	protein_coding	1.132	2.191	2.191	0.757982	0.00020818	Up
ENSG00000266010	GATA6-AS1	lncRNA	1.131	2.19	2.19	2.19656	2.5001e-06	Up
ENSG00000247950	SEC24B-AS1	lncRNA	1.13	2.188	2.188	0.175407	0.004355	Up
ENSG00000231389	HLA-DPA1	protein_coding	1.13	2.189	2.189	3.79841	6.6912e-8	Up
ENSG00000112379	ARFGEF3	protein_coding	1.129	2.187	2.187	4.41139	4.0781e-10	Up
ENSG00000103316	CRYM	protein_coding	1.129	2.187	2.187	1.68175	2.501e-05	Up
ENSG00000060140	STYK1	protein_coding	1.129	2.186	2.186	0.789763	0.00059094	Up
ENSG00000117598	PLPPR5	protein_coding	1.129	2.187	2.187	0.108168	0.0015487	Up
ENSG00000168267	PTF1A	protein_coding	1.128	2.186	2.186	-1.12431	0.020548	Up
ENSG00000144810	COL8A1	protein_coding	1.127	2.183	2.183	-0.316209	0.0069971	Up
ENSG00000251364	AC107884.1	lncRNA	1.126	2.182	2.182	0.473855	0.00094374	Up
ENSG00000121417	ZNF211	protein_coding	1.126	2.183	2.183	3.07638	2.2248e-7	Up
ENSG00000260086	AC007611.1	lncRNA	1.125	2.181	2.181	0.527914	0.0010638	Up
ENSG00000274895	AC011700.1	lncRNA	1.125	2.181	2.181	-1.33187	0.030978	Up
ENSG00000158246	TENT5B	protein_coding	1.125	2.181	2.181	1.18039	9.5242e-05	Up
ENSG00000261136	AC023908.3	lncRNA	1.124	2.18	2.18	0.705207	0.0028123	Up
ENSG00000127824	TUBA4A	protein_coding	1.122	2.176	2.176	2.46184	2.039e-06	Up
ENSG00000275441	AC020765.2	lncRNA	1.12	2.174	2.174	0.662914	0.00029691	Up
ENSG00000273032	DGCR9	lncRNA	1.12	2.173	2.173	0.218807	0.00099558	Up
ENSG00000159905	AC006213.1	protein_coding	1.12	2.173	2.173	-0.110574	0.0040178	Up
ENSG00000278704	BX004987.1	protein_coding	1.119	2.171	2.171	-0.983304	0.013908	Up
ENSG00000283183	AC116565.1	lncRNA	1.118	2.171	2.171	0.101519	0.0013318	Up
ENSG00000277342	AC048344.4	lncRNA	1.118	2.171	2.171	-0.605776	0.0059962	Up
ENSG00000075461	CACNG4	protein_coding	1.118	2.17	2.17	1.65921	9.7217e-06	Up
ENSG00000273320	AC007032.1	lncRNA	1.117	2.169	2.169	-0.00335695	0.0010817	Up
ENSG00000255100	AP003119.2	lncRNA	1.117	2.169	2.169	0.302356	0.002892	Up
ENSG00000159915	ZNF233	protein_coding	1.117	2.168	2.168	-1.18531	0.020191	Up
ENSG00000267838	AC245884.8	lncRNA	1.116	2.168	2.168	-1.06657	0.03971	Up
ENSG00000251562	MALAT1	lncRNA	1.115	2.166	2.166	7.23852	7.8879e-8	Up
ENSG00000116032	GRIN3B	protein_coding	1.115	2.165	2.165	0.0438297	0.0030205	Up
ENSG00000166866	MYO1A	protein_coding	1.115	2.166	2.166	-0.74752	0.026665	Up
ENSG00000074317	SNCB	protein_coding	1.112	2.162	2.162	2.97594	1.293e-7	Up
ENSG00000177932	ZNF354C	protein_coding	1.112	2.161	2.161	-0.564469	0.0073061	Up
ENSG00000198821	CD247	protein_coding	1.112	2.161	2.161	-1.34917	0.020142	Up
ENSG00000267260	AC020928.2	lncRNA	1.111	2.16	2.16	1.30989	3.3257e-05	Up
ENSG00000187193	MT1X	protein_coding	1.111	2.16	2.16	2.78031	2.6151e-7	Up
ENSG00000277214	AC009159.2	lncRNA	1.11	2.159	2.159	-0.117218	0.002303	Up
ENSG00000258101	AC010173.1	lncRNA	1.11	2.159	2.159	-0.680401	0.0096453	Up
ENSG00000125148	MT2A	protein_coding	1.11	2.158	2.158	4.36016	1.367e-9	Up
ENSG00000149575	SCN2B	protein_coding	1.11	2.159	2.159	-0.658373	0.014946	Up
ENSG00000269906	AL606834.1	lncRNA	1.109	2.157	2.157	1.10664	0.00011103	Up
ENSG00000257556	LINC02298	lncRNA	1.109	2.156	2.156	1.22011	0.00012657	Up
ENSG00000224687	RASAL2-AS1	lncRNA	1.109	2.157	2.157	0.552077	0.00022338	Up
ENSG00000141753	IGFBP4	protein_coding	1.109	2.157	2.157	1.7179	3.2356e-05	Up
ENSG00000053524	MCF2L2	protein_coding	1.109	2.157	2.157	1.11524	6.8918e-05	Up
ENSG00000168071	CCDC88B	protein_coding	1.108	2.156	2.156	3.00885	1.783e-7	Up
ENSG00000198003	CCDC151	protein_coding	1.108	2.155	2.155	2.79936	9.7948e-7	Up
ENSG00000118997	DNAH7	protein_coding	1.108	2.156	2.156	0.708854	0.00088997	Up
ENSG00000071282	LMCD1	protein_coding	1.107	2.154	2.154	2.37108	1.0373e-06	Up
ENSG00000162631	NTNG1	protein_coding	1.106	2.152	2.152	-0.282392	0.0043333	Up
ENSG00000231721	LINC-PINT	lncRNA	1.105	2.152	2.152	2.19882	3.3898e-06	Up
ENSG00000158104	HPD	protein_coding	1.105	2.151	2.151	-0.930255	0.018042	Up
ENSG00000232903	LINC01166	lncRNA	1.103	2.148	2.148	-0.154568	0.0025652	Up
ENSG00000198453	ZNF568	protein_coding	1.103	2.148	2.148	1.76217	6.3466e-05	Up
ENSG00000262155	LINC02175	lncRNA	1.102	2.146	2.146	-0.806148	0.014598	Up
ENSG00000014914	MTMR11	protein_coding	1.102	2.146	2.146	3.39512	3.1905e-8	Up
ENSG00000102924	CBLN1	protein_coding	1.102	2.146	2.146	0.495709	0.00065002	Up
ENSG00000111728	ST8SIA1	protein_coding	1.1	2.143	2.143	0.919641	0.00016586	Up
ENSG00000182809	CRIP2	protein_coding	1.098	2.14	2.14	2.6173	5.7272e-7	Up
ENSG00000164404	GDF9	protein_coding	1.098	2.141	2.141	1.66904	6.9018e-05	Up
ENSG00000058085	LAMC2	protein_coding	1.098	2.141	2.141	1.14466	9.2983e-05	Up
ENSG00000169752	NRG4	protein_coding	1.097	2.138	2.138	2.22521	2.4305e-06	Up
ENSG00000196646	ZNF136	protein_coding	1.097	2.139	2.139	2.16948	3.6518e-06	Up
ENSG00000147655	RSPO2	protein_coding	1.097	2.139	2.139	0.258518	0.0029664	Up
ENSG00000223774	AL513217.1	lncRNA	1.096	2.137	2.137	-0.905279	0.021255	Up
ENSG00000179083	FAM133A	protein_coding	1.096	2.137	2.137	0.931243	0.00033099	Up
ENSG00000173546	CSPG4	protein_coding	1.095	2.137	2.137	3.84067	2.4663e-7	Up
ENSG00000189221	MAOA	protein_coding	1.094	2.135	2.135	0.0631123	0.0022133	Up
ENSG00000111432	FZD10	protein_coding	1.092	2.132	2.132	2.76819	3.7958e-7	Up
ENSG00000163362	INAVA	protein_coding	1.092	2.131	2.131	-0.690544	0.012173	Up
ENSG00000110076	NRXN2	protein_coding	1.091	2.131	2.131	2.71202	3.2661e-7	Up
ENSG00000243176	AC092944.1	lncRNA	1.09	2.129	2.129	-0.842304	0.016517	Up
ENSG00000278090	LUNAR1	lncRNA	1.088	2.126	2.126	-0.438168	0.0091843	Up
ENSG00000241472	PTPRG-AS1	lncRNA	1.087	2.125	2.125	2.17224	2.0401e-06	Up
ENSG00000233006	MIR3936HG	lncRNA	1.087	2.125	2.125	1.24528	5.7327e-05	Up
ENSG00000228705	LINC00659	lncRNA	1.087	2.124	2.124	-0.917577	0.015319	Up
ENSG00000260339	HEXA-AS1	lncRNA	1.087	2.125	2.125	-1.2168	0.029699	Up
ENSG00000105251	SHD	protein_coding	1.087	2.124	2.124	0.383659	0.00063797	Up
ENSG00000183111	ARHGEF37	protein_coding	1.086	2.123	2.123	1.91701	7.1544e-06	Up
ENSG00000276791	AC092117.1	lncRNA	1.085	2.121	2.121	1.36307	3.3554e-05	Up
ENSG00000253390	AC104561.1	lncRNA	1.085	2.121	2.121	-1.26506	0.025805	Up
ENSG00000276337	AC105429.1	lncRNA	1.084	2.119	2.119	2.21562	8.3403e-06	Up
ENSG00000129455	KLK8	protein_coding	1.084	2.12	2.12	-0.147791	0.0030532	Up
ENSG00000261441	AC124068.2	lncRNA	1.083	2.118	2.118	-0.595155	0.0094208	Up
ENSG00000269894	AC018809.1	lncRNA	1.083	2.119	2.119	-0.679084	0.012931	Up
ENSG00000183397	C19orf71	protein_coding	1.083	2.118	2.118	0.34158	0.0011113	Up
ENSG00000277586	NEFL	protein_coding	1.082	2.116	2.116	7.94158	5.6308e-11	Up
ENSG00000170909	OSCAR	protein_coding	1.082	2.117	2.117	-0.282074	0.0063341	Up
ENSG00000140009	ESR2	protein_coding	1.082	2.118	2.118	-0.467198	0.010244	Up
ENSG00000102678	FGF9	protein_coding	1.081	2.116	2.116	2.67246	8.1664e-7	Up
ENSG00000166510	CCDC68	protein_coding	1.08	2.114	2.114	1.10429	0.00010317	Up
ENSG00000229191	AL358473.1	lncRNA	1.079	2.113	2.113	1.24994	0.00033032	Up
ENSG00000125629	INSIG2	protein_coding	1.078	2.111	2.111	5.39528	1.7356e-9	Up
ENSG00000159753	CARMIL2	protein_coding	1.077	2.109	2.109	4.00395	2.1089e-8	Up
ENSG00000145198	VWA5B2	protein_coding	1.077	2.11	2.11	0.786203	0.0004265	Up
ENSG00000241990	PRR34-AS1	lncRNA	1.076	2.108	2.108	-0.879333	0.018762	Up
ENSG00000137747	TMPRSS13	protein_coding	1.076	2.108	2.108	0.808737	0.00066259	Up
ENSG00000227403	LINC01806	lncRNA	1.075	2.107	2.107	-0.26474	0.0064539	Up
ENSG00000185585	OLFML2A	protein_coding	1.075	2.106	2.106	2.2579	1.049e-05	Up
ENSG00000228288	PCAT6	lncRNA	1.074	2.105	2.105	2.32204	2.2945e-06	Up
ENSG00000276649	AL117335.1	lncRNA	1.074	2.105	2.105	-0.486396	0.0072011	Up
ENSG00000118407	FILIP1	protein_coding	1.074	2.105	2.105	0.983578	0.00025503	Up
ENSG00000164850	GPER1	protein_coding	1.074	2.106	2.106	-0.265508	0.0049034	Up
ENSG00000162746	FCRLB	protein_coding	1.072	2.103	2.103	0.240176	0.0017068	Up
ENSG00000182648	LINC01006	lncRNA	1.071	2.101	2.101	1.72663	2.1059e-05	Up
ENSG00000225077	LINC00337	lncRNA	1.069	2.099	2.099	1.51951	5.1308e-05	Up
ENSG00000126803	HSPA2	protein_coding	1.069	2.099	2.099	3.26211	1.5346e-7	Up
ENSG00000188859	FAM78B	protein_coding	1.069	2.098	2.098	-1.15467	0.021699	Up
ENSG00000267191	AC006213.4	lncRNA	1.067	2.095	2.095	-1.12493	0.0239	Up
ENSG00000273084	AC092171.5	lncRNA	1.066	2.094	2.094	0.285898	0.001166	Up
ENSG00000225434	LINC01504	lncRNA	1.066	2.094	2.094	-0.300192	0.020616	Up
ENSG00000173210	ABLIM3	protein_coding	1.066	2.094	2.094	1.90743	4.8376e-06	Up
ENSG00000164604	GPR85	protein_coding	1.066	2.093	2.093	0.216535	0.0035059	Up
ENSG00000243766	HOTTIP	lncRNA	1.065	2.092	2.092	0.225214	0.0010824	Up
ENSG00000145794	MEGF10	protein_coding	1.065	2.092	2.092	1.52721	7.6126e-05	Up
ENSG00000261202	Z83847.1	lncRNA	1.064	2.09	2.09	-0.770163	0.0074017	Up
ENSG00000158164	TMSB15A	protein_coding	1.064	2.091	2.091	2.66808	5.729e-7	Up
ENSG00000102174	PHEX	protein_coding	1.064	2.091	2.091	2.24782	7.7333e-06	Up
ENSG00000077935	SMC1B	protein_coding	1.063	2.09	2.09	-0.289916	0.012776	Up
ENSG00000170006	TMEM154	protein_coding	1.063	2.089	2.089	-0.748069	0.024187	Up
ENSG00000245149	RNF139-AS1	lncRNA	1.061	2.087	2.087	2.6968	8.6058e-7	Up
ENSG00000250073	AP000866.2	lncRNA	1.061	2.087	2.087	-0.495633	0.008407	Up
ENSG00000157578	LCA5L	protein_coding	1.061	2.086	2.086	0.0155532	0.0043257	Up
ENSG00000272398	CD24	protein_coding	1.058	2.083	2.083	1.7285	1.6193e-05	Up
ENSG00000184672	RALYL	protein_coding	1.058	2.082	2.082	-0.41119	0.016911	Up
ENSG00000139899	CBLN3	protein_coding	1.058	2.082	2.082	-0.637911	0.017287	Up
ENSG00000103034	NDRG4	protein_coding	1.057	2.08	2.08	4.41001	1.2522e-9	Up
ENSG00000158373	HIST1H2BD	protein_coding	1.055	2.077	2.077	2.20953	6.9761e-06	Up
ENSG00000143369	ECM1	protein_coding	1.055	2.077	2.077	1.19328	0.00010206	Up
ENSG00000271614	ATP2B1-AS1	lncRNA	1.054	2.076	2.076	0.783505	0.0002522	Up
ENSG00000095713	CRTAC1	protein_coding	1.054	2.076	2.076	2.34594	9.4658e-06	Up
ENSG00000102057	KCND1	protein_coding	1.054	2.076	2.076	1.66228	2.2023e-05	Up
ENSG00000186642	PDE2A	protein_coding	1.054	2.076	2.076	1.27373	0.00019648	Up
ENSG00000100311	PDGFB	protein_coding	1.052	2.074	2.074	0.893664	0.00030625	Up
ENSG00000167550	RHEBL1	protein_coding	1.051	2.071	2.071	2.30534	2.6841e-06	Up
ENSG00000105289	TJP3	protein_coding	1.051	2.072	2.072	1.41237	8.2226e-05	Up
ENSG00000144821	MYH15	protein_coding	1.051	2.071	2.071	0.49982	0.0010499	Up
ENSG00000215912	TTC34	protein_coding	1.05	2.07	2.07	0.508684	0.0011197	Up
ENSG00000245904	AC025164.1	lncRNA	1.049	2.07	2.07	0.0699185	0.0018536	Up
ENSG00000275481	AC025031.4	lncRNA	1.048	2.067	2.067	-0.515183	0.0091511	Up
ENSG00000101746	NOL4	protein_coding	1.048	2.067	2.067	2.79468	6.0658e-7	Up
ENSG00000168542	COL3A1	protein_coding	1.048	2.068	2.068	2.59286	1.5408e-05	Up
ENSG00000260230	FRRS1L	protein_coding	1.046	2.064	2.064	0.494489	0.00081419	Up
ENSG00000145063	AC062028.1	lncRNA	1.045	2.063	2.063	-1.53424	0.040987	Up
ENSG00000256312	AC138466.1	lncRNA	1.045	2.064	2.064	-1.21658	0.043505	Up
ENSG00000182472	CAPN12	protein_coding	1.045	2.064	2.064	2.26077	4.3446e-06	Up
ENSG00000104888	SLC17A7	protein_coding	1.045	2.063	2.063	2.27029	6.8737e-06	Up
ENSG00000109046	WSB1	protein_coding	1.044	2.062	2.062	7.8014	2.2744e-10	Up
ENSG00000267107	PCAT19	lncRNA	1.043	2.061	2.061	-0.0177	0.0045141	Up
ENSG00000077009	NMRK2	protein_coding	1.043	2.061	2.061	-0.723938	0.02012	Up
ENSG00000273066	AL355987.4	lncRNA	1.042	2.059	2.059	2.25712	1.1062e-05	Up
ENSG00000270061	AC068790.5	lncRNA	1.042	2.059	2.059	-0.877962	0.035765	Up
ENSG00000171794	UTF1	protein_coding	1.042	2.059	2.059	0.241234	0.0028669	Up
ENSG00000122025	FLT3	protein_coding	1.042	2.059	2.059	-0.403558	0.0096388	Up
ENSG00000272721	AC131235.2	lncRNA	1.041	2.058	2.058	-0.595962	0.01907	Up
ENSG00000023608	SNAPC1	protein_coding	1.04	2.057	2.057	4.48974	1.4642e-9	Up
ENSG00000138131	LOXL4	protein_coding	1.04	2.057	2.057	0.790378	0.0008997	Up
ENSG00000267905	AC008750.3	lncRNA	1.039	2.054	2.054	-0.866496	0.015875	Up
ENSG00000185002	RFX6	protein_coding	1.039	2.055	2.055	0.696321	0.00072004	Up
ENSG00000168404	MLKL	protein_coding	1.039	2.055	2.055	-0.702603	0.014357	Up
ENSG00000261655	AC100803.2	lncRNA	1.038	2.054	2.054	0.0624901	0.0045572	Up
ENSG00000175471	MCTP1	protein_coding	1.038	2.053	2.053	0.475264	0.00090963	Up
ENSG00000227268	KLLN	protein_coding	1.038	2.053	2.053	0.240406	0.0027721	Up
ENSG00000253508	AC004080.2	lncRNA	1.037	2.051	2.051	0.887176	0.00024134	Up
ENSG00000163637	PRICKLE2	protein_coding	1.037	2.051	2.051	1.70661	5.4587e-05	Up
ENSG00000179477	ALOX12B	protein_coding	1.037	2.052	2.052	-0.467833	0.0087545	Up
ENSG00000196569	LAMA2	protein_coding	1.037	2.052	2.052	-0.627104	0.013812	Up
ENSG00000272787	AC253536.6	lncRNA	1.036	2.051	2.051	1.2225	6.1571e-05	Up
ENSG00000227014	AC007285.1	lncRNA	1.036	2.051	2.051	-0.983719	0.027765	Up
ENSG00000196218	RYR1	protein_coding	1.036	2.051	2.051	1.10727	0.00022539	Up
ENSG00000128052	KDR	protein_coding	1.035	2.049	2.049	0.653797	0.002791	Up
ENSG00000136881	BAAT	protein_coding	1.035	2.049	2.049	-1.01073	0.026944	Up
ENSG00000254815	AP006284.1	lncRNA	1.034	2.048	2.048	2.62518	4.5853e-06	Up
ENSG00000147041	SYTL5	protein_coding	1.034	2.048	2.048	4.80588	1.1068e-9	Up
ENSG00000273374	AC069222.1	lncRNA	1.033	2.047	2.047	1.11217	0.00019136	Up
ENSG00000258458	AL160314.2	lncRNA	1.033	2.046	2.046	0.455245	0.0010882	Up
ENSG00000092758	COL9A3	protein_coding	1.033	2.046	2.046	3.767	4.7887e-8	Up
ENSG00000261211	AL031123.2	lncRNA	1.032	2.045	2.045	0.744095	0.00041971	Up
ENSG00000285053	TBCE	protein_coding	1.032	2.045	2.045	2.59946	3.5165e-06	Up
ENSG00000226819	MEIS1-AS3	lncRNA	1.031	2.044	2.044	-0.495951	0.0094271	Up
ENSG00000140450	ARRDC4	protein_coding	1.031	2.043	2.043	6.44198	5.5878e-10	Up
ENSG00000267213	AC007773.1	lncRNA	1.03	2.043	2.043	0.606278	0.0012352	Up
ENSG00000041982	TNC	protein_coding	1.03	2.043	2.043	3.76672	2.3248e-7	Up
ENSG00000249087	ZNF436-AS1	lncRNA	1.028	2.04	2.04	3.80932	1.3229e-8	Up
ENSG00000224738	AC099850.1	lncRNA	1.028	2.039	2.039	0.606018	0.0013384	Up
ENSG00000269925	Z98884.2	lncRNA	1.028	2.039	2.039	-0.735614	0.014519	Up
ENSG00000250286	AC021491.2	lncRNA	1.027	2.038	2.038	-0.448661	0.01341	Up
ENSG00000163347	CLDN1	protein_coding	1.027	2.038	2.038	-0.147473	0.01249	Up
ENSG00000204396	VWA7	protein_coding	1.027	2.038	2.038	-0.759509	0.023665	Up
ENSG00000224046	AC005076.1	lncRNA	1.026	2.037	2.037	1.51303	6.8059e-05	Up
ENSG00000204219	TCEA3	protein_coding	1.025	2.036	2.036	0.488877	0.0037329	Up
ENSG00000137877	SPTBN5	protein_coding	1.025	2.036	2.036	-0.534637	0.017765	Up
ENSG00000140557	ST8SIA2	protein_coding	1.025	2.035	2.035	-0.0398516	0.023985	Up
ENSG00000234311	AL451069.3	lncRNA	1.024	2.033	2.033	-1.0662	0.023923	Up
ENSG00000161328	LRRC56	protein_coding	1.024	2.034	2.034	0.688068	0.0011349	Up
ENSG00000164855	TMEM184A	protein_coding	1.024	2.033	2.033	-0.917815	0.02432	Up
ENSG00000128594	LRRC4	protein_coding	1.023	2.032	2.032	0.115376	0.0037593	Up
ENSG00000046774	MAGEC2	protein_coding	1.023	2.032	2.032	-0.440236	0.019458	Up
ENSG00000181722	ZBTB20	protein_coding	1.022	2.031	2.031	0.421491	0.0010113	Up
ENSG00000184497	TMEM255B	protein_coding	1.022	2.031	2.031	-0.240771	0.0071188	Up
ENSG00000275549	STPG3-AS1	lncRNA	1.02	2.029	2.029	2.01644	2.8082e-05	Up
ENSG00000161149	TUBA3FP	lncRNA	1.02	2.028	2.028	-1.13986	0.031498	Up
ENSG00000171817	ZNF540	protein_coding	1.018	2.025	2.025	0.816079	0.00066963	Up
ENSG00000124159	MATN4	protein_coding	1.017	2.024	2.024	-0.394496	0.011556	Up
ENSG00000120049	KCNIP2	protein_coding	1.016	2.022	2.022	0.958369	0.00049009	Up
ENSG00000140853	NLRC5	protein_coding	1.016	2.022	2.022	0.495024	0.0025091	Up
ENSG00000157343	ARMC12	protein_coding	1.016	2.022	2.022	-0.504645	0.0076553	Up
ENSG00000251095	AC097478.1	lncRNA	1.015	2.02	2.02	1.31947	0.00040312	Up
ENSG00000230530	LIMD1-AS1	lncRNA	1.015	2.021	2.021	-0.0747748	0.0076064	Up
ENSG00000230084	AC006059.1	lncRNA	1.015	2.021	2.021	-0.956519	0.02432	Up
ENSG00000138166	DUSP5	protein_coding	1.015	2.021	2.021	3.09607	2.4313e-7	Up
ENSG00000196502	SULT1A1	protein_coding	1.015	2.021	2.021	3.02604	4.7039e-7	Up
ENSG00000174405	LIG4	protein_coding	1.015	2.021	2.021	2.41859	7.6678e-06	Up
ENSG00000267750	RUNDC3A-AS1	lncRNA	1.014	2.019	2.019	1.91208	1.3966e-05	Up
ENSG00000182580	EPHB3	protein_coding	1.013	2.018	2.018	2.88601	1.2074e-06	Up
ENSG00000089041	P2RX7	protein_coding	1.013	2.019	2.019	0.181367	0.0027563	Up
ENSG00000173809	AC008736.1	protein_coding	1.012	2.017	2.017	0.93831	0.00085209	Up
ENSG00000285825	AP003501.3	lncRNA	1.011	2.016	2.016	-0.794163	0.021615	Up
ENSG00000269246	AC011445.2	lncRNA	1.011	2.015	2.015	-0.78179	0.025872	Up
ENSG00000197748	CFAP43	protein_coding	1.011	2.015	2.015	1.96588	1.3508e-05	Up
ENSG00000164078	MST1R	protein_coding	1.011	2.015	2.015	0.381574	0.0046419	Up
ENSG00000100290	BIK	protein_coding	1.011	2.016	2.016	0.0621203	0.0050079	Up
ENSG00000179743	AL450998.2	lncRNA	1.01	2.014	2.014	4.81997	1.3223e-9	Up
ENSG00000261390	MAFTRR	lncRNA	1.01	2.013	2.013	-0.282262	0.013743	Up
ENSG00000286123	AL049828.2	lncRNA	1.01	2.014	2.014	-0.565789	0.021004	Up
ENSG00000184557	SOCS3	protein_coding	1.01	2.014	2.014	1.58711	9.3416e-05	Up
ENSG00000260000	AL133338.1	lncRNA	1.007	2.01	2.01	2.20629	1.4487e-05	Up
ENSG00000267568	AC016168.2	lncRNA	1.007	2.01	2.01	-0.930583	0.024288	Up
ENSG00000237940	LINC01238	lncRNA	1.006	2.008	2.008	0.693657	0.00053451	Up
ENSG00000279342	AP000866.6	lncRNA	1.005	2.007	2.007	1.10053	0.00064305	Up
ENSG00000155980	KIF5A	protein_coding	1.005	2.006	2.006	5.05889	1.001e-9	Up
ENSG00000251141	MRPS30-DT	lncRNA	1.003	2.004	2.004	0.762699	0.00068658	Up
ENSG00000102144	PGK1	protein_coding	1.003	2.004	2.004	10.5052	3.3535e-10	Up
ENSG00000146250	PRSS35	protein_coding	1.003	2.005	2.005	2.51121	9.5602e-06	Up
ENSG00000249655	AC008434.1	lncRNA	1.002	2.003	2.003	-1.18505	0.034895	Up
ENSG00000159216	RUNX1	protein_coding	1.002	2.003	2.003	3.85707	1.7887e-8	Up
ENSG00000258982	AL133523.1	lncRNA	1.001	2.002	2.002	-0.983261	0.034137	Up
ENSG00000105329	AC011462.1	protein_coding	1.001	2.002	2.002	4.7092	2.6744e-9	Up
ENSG00000183208	GDPGP1	protein_coding	-1.002	2.003	2.003	0.692506	0.0023463	Down
ENSG00000185813	PCYT2	protein_coding	-1.009	2.013	2.013	4.86513	3.6078e-9	Down
ENSG00000274630	AC125257.2	lncRNA	-1.01	2.014	2.014	0.0364243	0.017252	Down
ENSG00000231871	IPO9-AS1	lncRNA	-1.015	2.021	2.021	-1.02415	0.044059	Down
ENSG00000273149	AL138963.3	lncRNA	-1.016	2.022	2.022	4.87604	7.5829e-7	Down
ENSG00000249786	EAF1-AS1	lncRNA	-1.019	2.027	2.027	-1.20067	0.033168	Down
ENSG00000132522	GPS2	protein_coding	-1.019	2.027	2.027	3.19554	1.2687e-06	Down
ENSG00000265263	AC124066.1	lncRNA	-1.022	2.03	2.03	0.825762	0.0010362	Down
ENSG00000261684	AC018362.1	lncRNA	-1.028	2.039	2.039	-0.841498	0.020798	Down
ENSG00000224407	AL136988.1	lncRNA	-1.028	2.039	2.039	-0.817017	0.022403	Down
ENSG00000082482	KCNK2	protein_coding	-1.03	2.042	2.042	0.866416	0.0010689	Down
ENSG00000255252	AL078612.1	lncRNA	-1.037	2.051	2.051	0.207619	0.0030868	Down
ENSG00000245322	AC097460.1	lncRNA	-1.038	2.054	2.054	0.17116	0.0030591	Down
ENSG00000155846	PPARGC1B	protein_coding	-1.042	2.059	2.059	4.54909	6.1188e-9	Down
ENSG00000261505	AL031714.1	lncRNA	-1.047	2.066	2.066	1.19067	0.00092985	Down
ENSG00000136327	NKX2-8	protein_coding	-1.048	2.068	2.068	0.833993	0.00051281	Down
ENSG00000239653	PSMD6-AS2	lncRNA	-1.056	2.079	2.079	-0.323792	0.014194	Down
ENSG00000124215	CDH26	protein_coding	-1.06	2.084	2.084	1.24496	0.00010666	Down
ENSG00000111664	GNB3	protein_coding	-1.066	2.094	2.094	2.60324	2.0814e-06	Down
ENSG00000133124	IRS4	protein_coding	-1.071	2.101	2.101	7.87185	3.1187e-11	Down
ENSG00000198732	SMOC1	protein_coding	-1.085	2.121	2.121	5.6508	1.2079e-9	Down
ENSG00000147804	SLC39A4	protein_coding	-1.088	2.125	2.125	4.1614	5.1366e-9	Down
ENSG00000138744	NAAA	protein_coding	-1.089	2.127	2.127	-0.486458	0.011618	Down
ENSG00000261409	AL035425.3	lncRNA	-1.09	2.129	2.129	8.65214	3.5141e-10	Down
ENSG00000228363	AC015971.1	lncRNA	-1.096	2.138	2.138	-1.02393	0.02567	Down
ENSG00000231760	AL355312.2	lncRNA	-1.099	2.141	2.141	0.0306065	0.0089246	Down
ENSG00000258017	AC011603.2	lncRNA	-1.104	2.15	2.15	3.51997	1.0862e-06	Down
ENSG00000186710	CFAP73	protein_coding	-1.11	2.158	2.158	0.258345	0.0013729	Down
ENSG00000116977	LGALS8	protein_coding	-1.112	2.162	2.162	-0.168812	0.0044025	Down
ENSG00000237054	PRMT5-AS1	lncRNA	-1.114	2.165	2.165	0.856584	0.00085209	Down
ENSG00000118894	EEF2KMT	protein_coding	-1.118	2.171	2.171	4.64917	1.2707e-9	Down
ENSG00000186919	ZACN	protein_coding	-1.118	2.17	2.17	0.0894913	0.0035789	Down
ENSG00000234222	LIX1L-AS1	lncRNA	-1.12	2.173	2.173	0.685178	0.00070425	Down
ENSG00000229044	AL451070.1	lncRNA	-1.123	2.178	2.178	-1.03773	0.015296	Down
ENSG00000262198	AL157931.1	lncRNA	-1.126	2.183	2.183	-1.0655	0.019398	Down
ENSG00000272742	AC135457.1	lncRNA	-1.136	2.198	2.198	0.231445	0.00070594	Down
ENSG00000257342	AC025165.2	lncRNA	-1.143	2.208	2.208	-0.70228	0.016266	Down
ENSG00000165644	COMTD1	protein_coding	-1.147	2.214	2.214	4.64448	1.367e-9	Down
ENSG00000258429	PDF	protein_coding	-1.148	2.216	2.216	0.478126	0.0019933	Down
ENSG00000160285	LSS	protein_coding	-1.149	2.217	2.217	6.14789	1.4433e-10	Down
ENSG00000271980	AC012640.4	lncRNA	-1.159	2.233	2.233	1.50123	4.4062e-05	Down
ENSG00000102890	ELMO3	protein_coding	-1.164	2.241	2.241	1.34162	3.4634e-05	Down
ENSG00000121310	ECHDC2	protein_coding	-1.166	2.244	2.244	-0.701958	0.0074412	Down
ENSG00000180113	TDRD6	protein_coding	-1.178	2.263	2.263	0.49503	0.0016721	Down
ENSG00000172893	DHCR7	protein_coding	-1.179	2.263	2.263	7.02343	1.1068e-9	Down
ENSG00000197753	LHFPL5	protein_coding	-1.194	2.287	2.287	0.20053	0.0023719	Down
ENSG00000260853	AC109460.2	lncRNA	-1.204	2.303	2.303	-0.930035	0.015876	Down
ENSG00000269984	AC078795.1	lncRNA	-1.207	2.309	2.309	-0.805036	0.012577	Down
ENSG00000264324	AC006030.1	protein_coding	-1.208	2.31	2.31	-0.0368187	0.00096537	Down
ENSG00000079459	FDFT1	protein_coding	-1.218	2.327	2.327	7.44415	4.8602e-12	Down
ENSG00000160602	AC010761.1	protein_coding	-1.219	2.328	2.328	3.24138	1.0515e-7	Down
ENSG00000235079	ZRANB2-AS1	lncRNA	-1.222	2.332	2.332	0.275829	0.0015062	Down
ENSG00000261448	AC109446.3	lncRNA	-1.222	2.333	2.333	-0.865803	0.012808	Down
ENSG00000151012	SLC7A11	protein_coding	-1.223	2.334	2.334	5.34739	4.2884e-9	Down
ENSG00000254721	AP000879.1	lncRNA	-1.229	2.343	2.343	-0.781983	0.011183	Down
ENSG00000125851	PCSK2	protein_coding	-1.229	2.345	2.345	-0.647203	0.0068633	Down
ENSG00000254873	AP001267.1	lncRNA	-1.242	2.365	2.365	0.134292	0.00081954	Down
ENSG00000264577	AC010761.2	lncRNA	-1.245	2.37	2.37	4.80722	1.7338e-8	Down
ENSG00000000005	TNMD	protein_coding	-1.257	2.39	2.39	2.07215	3.0909e-06	Down
ENSG00000234818	AC007314.1	lncRNA	-1.275	2.42	2.42	-0.375516	0.0024043	Down
ENSG00000242539	AC007620.2	lncRNA	-1.282	2.431	2.431	-0.996245	0.0086299	Down
ENSG00000260400	AL513534.2	lncRNA	-1.286	2.438	2.438	2.4207	9.9811e-7	Down
ENSG00000256364	AC069234.2	lncRNA	-1.289	2.444	2.444	-1.09463	0.007933	Down
ENSG00000282034	AC106886.5	protein_coding	-1.301	2.465	2.465	-0.782481	0.0091308	Down
ENSG00000234695	AC002076.1	lncRNA	-1.304	2.469	2.469	-0.969554	0.016819	Down
ENSG00000232729	AC211433.1	lncRNA	-1.306	2.473	2.473	-0.534207	0.0042031	Down
ENSG00000101306	MYLK2	protein_coding	-1.308	2.476	2.476	-0.505809	0.0045141	Down
ENSG00000269243	AC008894.2	lncRNA	-1.317	2.491	2.491	-0.545267	0.0071357	Down
ENSG00000237080	EHMT2-AS1	lncRNA	-1.341	2.533	2.533	-1.12465	0.011314	Down
ENSG00000228060	PABPC4-AS1	lncRNA	-1.348	2.546	2.546	-0.544908	0.011446	Down
ENSG00000254907	AC087276.2	lncRNA	-1.35	2.549	2.549	-0.866282	0.0052298	Down
ENSG00000274956	NKAIN3-IT1	lncRNA	-1.37	2.585	2.585	-0.982641	0.011101	Down
ENSG00000128965	CHAC1	protein_coding	-1.373	2.589	2.589	2.37178	2.1927e-06	Down
ENSG00000258525	AL049830.3	lncRNA	-1.376	2.596	2.596	-0.33168	0.0020509	Down
ENSG00000262413	AC145207.2	lncRNA	-1.381	2.604	2.604	0.405606	0.00013504	Down
ENSG00000277873	AC131159.2	lncRNA	-1.393	2.627	2.627	-0.982588	0.0066157	Down
ENSG00000234945	GTF3C2-AS1	lncRNA	-1.394	2.628	2.628	-1.23333	0.023619	Down
ENSG00000273489	AC008264.2	lncRNA	-1.406	2.65	2.65	-1.05147	0.0045559	Down
ENSG00000198763	MT-ND2	protein_coding	-1.407	2.652	2.652	9.92472	2.793e-8	Down
ENSG00000263585	AC145207.4	lncRNA	-1.416	2.668	2.668	-0.626067	0.0016011	Down
ENSG00000259049	AL139317.3	lncRNA	-1.418	2.673	2.673	-0.524227	0.0034492	Down
ENSG00000185689	C6orf201	protein_coding	-1.432	2.698	2.698	-0.240397	0.0010311	Down
ENSG00000245970	AP003352.1	lncRNA	-1.433	2.701	2.701	3.61555	3.2906e-7	Down
ENSG00000138079	SLC3A1	protein_coding	-1.435	2.705	2.705	-0.968782	0.0040422	Down
ENSG00000021645	NRXN3	protein_coding	-1.448	2.729	2.729	4.17264	2.6366e-10	Down
ENSG00000112972	HMGCS1	protein_coding	-1.466	2.763	2.763	6.94749	1.8305e-13	Down
ENSG00000233144	AL512656.1	lncRNA	-1.469	2.769	2.769	-1.11002	0.0086748	Down
ENSG00000263986	AC087393.2	lncRNA	-1.477	2.784	2.784	-1.00937	0.0023384	Down
ENSG00000272540	AL662797.1	lncRNA	-1.482	2.794	2.794	2.72	1.1515e-06	Down
ENSG00000286018	AF129075.3	lncRNA	-1.483	2.796	2.796	0.73671	1.1764e-05	Down
ENSG00000285677	AL355388.3	lncRNA	-1.489	2.807	2.807	-0.804745	0.002575	Down
ENSG00000198695	MT-ND6	protein_coding	-1.495	2.818	2.818	5.64151	1.1123e-7	Down
ENSG00000285830	AL109628.2	lncRNA	-1.531	2.891	2.891	-0.584623	0.0010248	Down
ENSG00000219410	AC125494.1	lncRNA	-1.534	2.896	2.896	-0.615242	0.00093999	Down
ENSG00000245748	AC097382.2	lncRNA	-1.539	2.905	2.905	-1.0665	0.0060626	Down
ENSG00000228302	AL512770.1	lncRNA	-1.551	2.931	2.931	-0.553613	0.00067066	Down
ENSG00000203865	ATP1A1-AS1	lncRNA	-1.585	3.001	3.001	2.28122	5.8534e-06	Down
ENSG00000067064	IDI1	protein_coding	-1.588	3.007	3.007	6.8474	2.3346e-13	Down
ENSG00000198865	CCDC152	protein_coding	-1.599	3.029	3.029	0.134249	0.00057763	Down
ENSG00000177182	CLVS1	protein_coding	-1.601	3.034	3.034	-0.657822	0.0010656	Down
ENSG00000250917	AL035458.2	lncRNA	-1.603	3.038	3.038	-0.20052	0.00029251	Down
ENSG00000220925	IGBP1-AS2	lncRNA	-1.607	3.047	3.047	-0.955725	0.0029477	Down
ENSG00000284526	AC015802.6	protein_coding	-1.634	3.105	3.105	0.524584	4.3168e-05	Down
ENSG00000130164	LDLR	protein_coding	-1.654	3.148	3.148	5.46627	1.8977e-12	Down
ENSG00000236498	AC107081.2	lncRNA	-1.673	3.189	3.189	0.496031	4.6848e-05	Down
ENSG00000227751	RCC2-AS1	lncRNA	-1.703	3.255	3.255	-1.10951	0.0017506	Down
ENSG00000198938	MT-CO3	protein_coding	-1.706	3.262	3.262	11.8876	2.3049e-9	Down
ENSG00000260465	AC018557.1	lncRNA	-1.722	3.298	3.298	-0.702206	0.0020487	Down
ENSG00000198727	MT-CYB	protein_coding	-1.726	3.308	3.308	10.3055	1.911e-9	Down
ENSG00000272711	AC019069.1	lncRNA	-1.734	3.327	3.327	1.38095	2.208e-05	Down
ENSG00000104549	SQLE	protein_coding	-1.754	3.372	3.372	8.23201	6.704e-13	Down
ENSG00000198840	MT-ND3	protein_coding	-1.811	3.509	3.509	9.34932	1.621e-9	Down
ENSG00000196517	SLC6A9	protein_coding	-1.824	3.541	3.541	3.86248	9.4781e-11	Down
ENSG00000267105	AC011511.3	lncRNA	-1.867	3.648	3.648	-1.21618	0.0015905	Down
ENSG00000162595	DIRAS3	protein_coding	-1.933	3.818	3.818	0.0700829	0.00020942	Down
ENSG00000283375	AC087521.4	lncRNA	-1.965	3.904	3.904	-0.447754	0.00082767	Down
ENSG00000198712	MT-CO2	protein_coding	-2.029	4.082	4.082	12.428	2.2575e-10	Down
ENSG00000285608	AL161665.1	lncRNA	-2.152	4.446	4.446	-0.82944	0.00015829	Down
ENSG00000255959	AP000777.2	lncRNA	-2.225	4.675	4.675	-0.916669	0.00018881	Down
ENSG00000198899	MT-ATP6	protein_coding	-2.29	4.892	4.892	11.1671	1.3751e-11	Down
ENSG00000228253	MT-ATP8	protein_coding	-2.38	5.205	5.205	8.17923	9.281e-12	Down
ENSG00000261604	AC114947.2	lncRNA	-2.927	7.604	7.604	-0.271716	1.6641e-06	Down

## Sheet: SETD2CvsFL
Supplementary Data 1. RNA-seq Differential Expression Analysis Report for SETD2 knockout cells expressing SETD2 C vs SETD2 FL
GeneID	GeneName	BioType	log2FoldChange	FoldChange	FoldChangeShow	log2CPM	FDR	Class
ENSG00000286085	AL109653.3	lncRNA	5.439	43.396	10	-0.466734	2.9268e-8	Up
ENSG00000258667	HIF1A-AS2	lncRNA	4.562	23.628	10	-0.66928	8.0115e-8	Up
ENSG00000253633	AP002852.1	lncRNA	4.106	17.223	10	-0.700579	2.7073e-7	Up
ENSG00000169067	ACTBL2	protein_coding	4.079	16.903	10	-1.59548	7.5047e-06	Up
ENSG00000256006	AC084117.1	lncRNA	4.049	16.55	10	-0.72291	1.7711e-06	Up
ENSG00000248323	LUCAT1	lncRNA	3.99	15.894	10	-1.61654	2.1364e-05	Up
ENSG00000186352	ANKRD37	protein_coding	3.983	15.813	10	5.41566	3.7226e-16	Up
ENSG00000107159	CA9	protein_coding	3.963	15.595	10	-1.65864	8.1734e-06	Up
ENSG00000125675	GRIA3	protein_coding	3.806	13.989	10	-1.53472	7.4916e-06	Up
ENSG00000163286	ALPG	protein_coding	3.751	13.459	10	-1.05226	1.0741e-06	Up
ENSG00000251127	AC091173.1	lncRNA	3.699	12.988	10	-1.31486	2.0863e-06	Up
ENSG00000184719	RNLS	protein_coding	3.576	11.928	10	-1.61623	2.4846e-05	Up
ENSG00000166670	MMP10	protein_coding	3.544	11.665	10	-1.99651	5.4417e-05	Up
ENSG00000182916	TCEAL7	protein_coding	3.515	11.433	10	0.918028	5.3172e-10	Up
ENSG00000135245	HILPDA	protein_coding	3.493	11.261	10	7.88227	4.2685e-16	Up
ENSG00000272663	AC093635.1	lncRNA	3.426	10.745	10	-1.28084	1.5622e-05	Up
ENSG00000160886	LY6K	protein_coding	3.404	10.584	10	-0.103131	8.0795e-8	Up
ENSG00000179046	TRIML2	protein_coding	3.382	10.427	10	-1.36637	7.0823e-06	Up
ENSG00000173262	SLC2A14	protein_coding	3.162	8.953	8.953	1.26558	3.0125e-10	Up
ENSG00000006606	CCL26	protein_coding	3.143	8.832	8.832	-1.13852	1.1754e-05	Up
ENSG00000230943	LINC02541	lncRNA	3.114	8.657	8.657	-1.51496	0.00015317	Up
ENSG00000109846	CRYAB	protein_coding	3.096	8.548	8.548	-0.780198	1.416e-05	Up
ENSG00000284632	AL354702.2	lncRNA	3.079	8.453	8.453	-1.57535	6.0932e-05	Up
ENSG00000138356	AOX1	protein_coding	3.028	8.154	8.154	-1.65829	3.2775e-05	Up
ENSG00000049247	UTS2	protein_coding	3.024	8.135	8.135	-1.53482	5.4349e-05	Up
ENSG00000148926	ADM	protein_coding	2.967	7.819	7.819	3.796	1.1225e-14	Up
ENSG00000154016	GRAP	protein_coding	2.946	7.704	7.704	-1.09528	5.328e-06	Up
ENSG00000260922	AC009139.1	lncRNA	2.916	7.546	7.546	-0.957541	3.9403e-05	Up
ENSG00000283740	TAF11L11	protein_coding	2.9	7.464	7.464	-1.57437	0.00010749	Up
ENSG00000146674	IGFBP3	protein_coding	2.856	7.239	7.239	0.0376565	1.2539e-7	Up
ENSG00000262406	MMP12	protein_coding	2.846	7.192	7.192	-0.736403	1.2695e-06	Up
ENSG00000120708	TGFBI	protein_coding	2.845	7.183	7.183	-1.59529	0.00060711	Up
ENSG00000140481	CCDC33	protein_coding	2.793	6.93	6.93	-0.374158	1.5051e-06	Up
ENSG00000164849	GPR146	protein_coding	2.789	6.911	6.911	0.951313	4.855e-9	Up
ENSG00000169429	CXCL8	protein_coding	2.776	6.849	6.849	-1.15505	1.1164e-05	Up
ENSG00000179674	ARL14	protein_coding	2.773	6.837	6.837	-0.401956	9.2875e-7	Up
ENSG00000244041	LINC01011	lncRNA	2.76	6.776	6.776	2.47627	4.4953e-12	Up
ENSG00000275216	AL161431.1	lncRNA	2.728	6.626	6.626	-0.208343	2.6258e-7	Up
ENSG00000140678	ITGAX	protein_coding	2.721	6.593	6.593	0.0881501	2.4241e-7	Up
ENSG00000196890	HIST3H2BB	protein_coding	2.703	6.512	6.512	3.16385	5.2303e-12	Up
ENSG00000203814	HIST2H2BF	protein_coding	2.672	6.371	6.371	0.663973	5.4494e-8	Up
ENSG00000185168	LINC00482	lncRNA	2.648	6.269	6.269	-1.65876	0.00022101	Up
ENSG00000105605	CACNG7	protein_coding	2.647	6.265	6.265	0.789295	7.343e-8	Up
ENSG00000111674	ENO2	protein_coding	2.64	6.232	6.232	5.89827	3.7226e-16	Up
ENSG00000147614	ATP6V0D2	protein_coding	2.631	6.196	6.196	1.22181	1.7689e-9	Up
ENSG00000153303	FRMD1	protein_coding	2.604	6.08	6.08	2.12596	5.6735e-10	Up
ENSG00000136099	PCDH8	protein_coding	2.591	6.024	6.024	0.0495157	2.5255e-7	Up
ENSG00000227718	AC016730.1	lncRNA	2.58	5.981	5.981	-1.70226	0.00028146	Up
ENSG00000275038	AC091980.2	lncRNA	2.566	5.92	5.92	-1.28138	5.2936e-05	Up
ENSG00000165182	CXorf58	protein_coding	2.562	5.904	5.904	-1.89161	0.00036187	Up
ENSG00000277223	AC090116.1	lncRNA	2.553	5.868	5.868	-1.00932	6.6794e-05	Up
ENSG00000261366	MANEA-DT	lncRNA	2.549	5.853	5.853	0.305346	3.248e-7	Up
ENSG00000059804	SLC2A3	protein_coding	2.535	5.795	5.795	6.8382	2.219e-14	Up
ENSG00000279765	AC013394.1	protein_coding	2.518	5.727	5.727	-0.573392	1.1296e-05	Up
ENSG00000145040	UCN2	protein_coding	2.517	5.724	5.724	-0.969309	8.296e-05	Up
ENSG00000253123	AC091182.1	lncRNA	2.515	5.717	5.717	4.23389	4.3966e-14	Up
ENSG00000133665	DYDC2	protein_coding	2.5	5.659	5.659	-1.61586	0.00013692	Up
ENSG00000237751	LINC01143	lncRNA	2.498	5.649	5.649	-1.15542	9.5629e-05	Up
ENSG00000133805	AMPD3	protein_coding	2.494	5.635	5.635	0.761642	2.3151e-7	Up
ENSG00000272405	AL365181.3	lncRNA	2.484	5.593	5.593	-0.747244	5.0264e-06	Up
ENSG00000286113	AC022868.2	lncRNA	2.476	5.562	5.562	-1.02383	2.8074e-05	Up
ENSG00000166793	YPEL4	protein_coding	2.473	5.553	5.553	0.98653	2.6e-8	Up
ENSG00000145063	AC062028.1	lncRNA	2.469	5.537	5.537	-1.53424	0.00043104	Up
ENSG00000233056	ERVH48-1	lncRNA	2.469	5.535	5.535	-0.43788	3.7073e-06	Up
ENSG00000152049	KCNE4	protein_coding	2.449	5.46	5.46	-1.21737	0.00011706	Up
ENSG00000253230	LINC00599	lncRNA	2.436	5.412	5.412	0.400516	8.5537e-8	Up
ENSG00000170345	FOS	protein_coding	2.411	5.32	5.32	3.24882	7.2075e-13	Up
ENSG00000260633	AC010207.1	lncRNA	2.406	5.301	5.301	-1.00928	0.00011409	Up
ENSG00000130066	SAT1	protein_coding	2.397	5.268	5.268	7.70882	5.4013e-15	Up
ENSG00000104435	STMN2	protein_coding	2.396	5.265	5.265	0.78227	1.2166e-7	Up
ENSG00000185633	NDUFA4L2	protein_coding	2.382	5.213	5.213	1.25731	1.4941e-8	Up
ENSG00000273209	AC069148.1	lncRNA	2.367	5.16	5.16	0.270858	4.8499e-7	Up
ENSG00000258947	TUBB3	protein_coding	2.359	5.131	5.131	-0.505694	7.4227e-06	Up
ENSG00000254577	AC087276.1	lncRNA	2.358	5.128	5.128	-1.05166	9.1317e-05	Up
ENSG00000245532	NEAT1	lncRNA	2.346	5.085	5.085	8.75981	2.2892e-13	Up
ENSG00000060566	CREB3L3	protein_coding	2.336	5.048	5.048	-1.13996	0.00038449	Up
ENSG00000159167	STC1	protein_coding	2.335	5.044	5.044	4.19132	9.6718e-14	Up
ENSG00000099365	STX1B	protein_coding	2.325	5.012	5.012	1.66614	2.2098e-9	Up
ENSG00000102359	SRPX2	protein_coding	2.324	5.009	5.009	1.04228	2.1962e-8	Up
ENSG00000184678	HIST2H2BE	protein_coding	2.311	4.964	4.964	4.55182	2.0482e-12	Up
ENSG00000145934	TENM2	protein_coding	2.307	4.949	4.949	-1.26525	8.0027e-05	Up
ENSG00000231473	RB1-DT	lncRNA	2.305	4.943	4.943	-1.61546	0.00078074	Up
ENSG00000175832	ETV4	protein_coding	2.302	4.931	4.931	-1.06559	7.9263e-05	Up
ENSG00000261051	AC107021.2	lncRNA	2.294	4.904	4.904	1.01926	2.5273e-8	Up
ENSG00000135046	ANXA1	protein_coding	2.288	4.885	4.885	4.26688	1.0494e-13	Up
ENSG00000276744	AC105137.2	lncRNA	2.287	4.881	4.881	-0.154081	4.7064e-06	Up
ENSG00000276600	RAB7B	protein_coding	2.284	4.871	4.871	-1.77031	0.00068876	Up
ENSG00000168079	SCARA5	protein_coding	2.281	4.861	4.861	2.61467	1.7718e-10	Up
ENSG00000137841	PLCB2	protein_coding	2.274	4.838	4.838	-1.33335	0.0004105	Up
ENSG00000235529	AGAP1-IT1	lncRNA	2.269	4.82	4.82	-0.930705	2.9167e-05	Up
ENSG00000122367	LDB3	protein_coding	2.263	4.799	4.799	-1.40324	0.00029281	Up
ENSG00000121966	CXCR4	protein_coding	2.244	4.737	4.737	6.13373	1.9827e-13	Up
ENSG00000205922	ONECUT3	protein_coding	2.232	4.698	4.698	-1.77033	0.0004932	Up
ENSG00000143320	CRABP2	protein_coding	2.232	4.697	4.697	5.43197	5.9545e-15	Up
ENSG00000260475	AL353719.1	lncRNA	2.229	4.687	4.687	-0.915781	0.00016927	Up
ENSG00000227676	LINC01068	lncRNA	2.223	4.668	4.668	-1.31428	0.0011254	Up
ENSG00000274898	AC001226.1	lncRNA	2.22	4.658	4.658	-0.534182	1.1731e-05	Up
ENSG00000196263	ZNF471	protein_coding	2.217	4.649	4.649	0.783454	5.0272e-8	Up
ENSG00000277170	AC012676.3	lncRNA	2.209	4.623	4.623	0.170789	1.8886e-06	Up
ENSG00000235092	ID2-AS1	lncRNA	2.204	4.609	4.609	0.0171697	2.098e-06	Up
ENSG00000197415	VEPH1	protein_coding	2.196	4.584	4.584	-1.55399	0.0033074	Up
ENSG00000197980	LEKR1	protein_coding	2.194	4.575	4.575	-1.10972	9.0969e-05	Up
ENSG00000247095	MIR210HG	lncRNA	2.191	4.566	4.566	4.15557	1.0494e-13	Up
ENSG00000136250	AOAH	protein_coding	2.188	4.556	4.556	-0.108775	2.8415e-06	Up
ENSG00000136999	CCN3	protein_coding	2.173	4.511	4.511	0.302361	8.2803e-7	Up
ENSG00000137834	SMAD6	protein_coding	2.172	4.507	4.507	5.93505	5.4013e-15	Up
ENSG00000013588	GPRC5A	protein_coding	2.171	4.504	4.504	3.81712	4.255e-13	Up
ENSG00000197620	CXorf40A	protein_coding	2.169	4.497	4.497	7.01159	5.4013e-15	Up
ENSG00000167766	ZNF83	protein_coding	2.165	4.484	4.484	0.418572	7.2779e-7	Up
ENSG00000135346	CGA	protein_coding	2.164	4.482	4.482	0.292598	5.5914e-7	Up
ENSG00000272735	AC007881.3	lncRNA	2.162	4.475	4.475	-0.689873	5.696e-05	Up
ENSG00000215915	ATAD3C	protein_coding	2.145	4.423	4.423	-0.554813	2.5584e-05	Up
ENSG00000050628	PTGER3	protein_coding	2.143	4.416	4.416	-0.544991	9.4775e-06	Up
ENSG00000234215	AC006012.1	lncRNA	2.142	4.415	4.415	-0.00360377	7.6498e-06	Up
ENSG00000274204	AL138689.1	lncRNA	2.137	4.399	4.399	-0.891208	0.00012571	Up
ENSG00000261202	Z83847.1	lncRNA	2.135	4.392	4.392	-0.770163	5.4499e-05	Up
ENSG00000281731	METTL14-DT	lncRNA	2.121	4.35	4.35	-1.4022	0.0019899	Up
ENSG00000280639	LINC02204	lncRNA	2.118	4.341	4.341	-1.43914	0.00044818	Up
ENSG00000233818	AP000695.2	lncRNA	2.116	4.335	4.335	-1.63754	0.0030812	Up
ENSG00000197769	MAP1LC3C	protein_coding	2.115	4.333	4.333	1.13621	6.421e-8	Up
ENSG00000265972	TXNIP	protein_coding	2.11	4.318	4.318	6.85137	3.019e-14	Up
ENSG00000137745	MMP13	protein_coding	2.099	4.283	4.283	-0.702483	2.9829e-05	Up
ENSG00000227533	SLC2A1-AS1	lncRNA	2.098	4.281	4.281	2.29293	3.5832e-10	Up
ENSG00000214145	LINC00887	lncRNA	2.094	4.269	4.269	-0.854055	4.6931e-05	Up
ENSG00000274698	AC099521.1	lncRNA	2.092	4.264	4.264	-0.0377439	5.7122e-06	Up
ENSG00000272449	AL139246.5	lncRNA	2.089	4.256	4.256	3.76885	3.2043e-11	Up
ENSG00000272695	GAS6-DT	lncRNA	2.087	4.247	4.247	-1.12495	0.0002704	Up
ENSG00000159915	ZNF233	protein_coding	2.086	4.244	4.244	-1.18531	0.00050064	Up
ENSG00000224418	STK24-AS1	lncRNA	2.085	4.243	4.243	-1.57499	0.00041513	Up
ENSG00000248773	AC108727.1	lncRNA	2.084	4.241	4.241	-1.57455	0.00058795	Up
ENSG00000047644	WWC3	protein_coding	2.083	4.237	4.237	-1.0247	0.00037588	Up
ENSG00000256139	AC007637.1	lncRNA	2.073	4.209	4.209	-1.07988	0.00020367	Up
ENSG00000182492	BGN	protein_coding	2.062	4.175	4.175	-1.33214	0.00023527	Up
ENSG00000187957	DNER	protein_coding	2.061	4.174	4.174	-1.21676	0.0004023	Up
ENSG00000170949	ZNF160	protein_coding	2.059	4.168	4.168	1.65939	7.883e-9	Up
ENSG00000162645	GBP2	protein_coding	2.057	4.163	4.163	0.759396	1.3216e-7	Up
ENSG00000160188	RSPH1	protein_coding	2.053	4.15	4.15	-1.31551	0.00045383	Up
ENSG00000123999	INHA	protein_coding	2.046	4.129	4.129	0.838251	2.5723e-7	Up
ENSG00000137868	STRA6	protein_coding	2.044	4.125	4.125	0.915388	5.5835e-8	Up
ENSG00000125337	KIF25	protein_coding	2.038	4.106	4.106	0.705599	5.8351e-7	Up
ENSG00000132718	SYT11	protein_coding	2.036	4.1	4.1	0.878417	6.9606e-8	Up
ENSG00000134107	BHLHE40	protein_coding	2.028	4.079	4.079	7.58287	1.9427e-14	Up
ENSG00000113083	LOX	protein_coding	2.025	4.071	4.071	6.03483	9.148e-13	Up
ENSG00000239569	KMT2E-AS1	lncRNA	2.02	4.057	4.057	2.39938	1.0555e-9	Up
ENSG00000272812	AC004908.2	lncRNA	2.016	4.043	4.043	0.893886	1.4709e-06	Up
ENSG00000255314	AC024475.4	lncRNA	2.01	4.028	4.028	-0.615684	2.1191e-05	Up
ENSG00000148204	CRB2	protein_coding	2.006	4.017	4.017	-1.40258	0.00068291	Up
ENSG00000150628	SPATA4	protein_coding	2	4	4	-1.06619	0.00035803	Up
ENSG00000253414	AC124067.2	lncRNA	1.996	3.99	3.99	1.47139	5.1238e-8	Up
ENSG00000130656	HBZ	protein_coding	1.995	3.986	3.986	-1.10844	0.00087413	Up
ENSG00000152137	HSPB8	protein_coding	1.987	3.963	3.963	3.23319	6.5117e-12	Up
ENSG00000196878	LAMB3	protein_coding	1.983	3.952	3.952	1.01554	7.2563e-8	Up
ENSG00000196081	ZNF724	protein_coding	1.983	3.952	3.952	-1.70251	0.00086666	Up
ENSG00000153233	PTPRR	protein_coding	1.981	3.948	3.948	-0.132383	6.2608e-06	Up
ENSG00000171533	MAP6	protein_coding	1.981	3.947	3.947	1.17907	2.5324e-8	Up
ENSG00000278493	AC039056.2	lncRNA	1.977	3.935	3.935	-1.08061	0.00014259	Up
ENSG00000104419	NDRG1	protein_coding	1.976	3.934	3.934	8.88523	2.296e-14	Up
ENSG00000175766	EIF4E1B	protein_coding	1.975	3.93	3.93	-1.36686	0.0016184	Up
ENSG00000130844	ZNF331	protein_coding	1.973	3.926	3.926	1.90841	3.4889e-8	Up
ENSG00000260774	AC021087.3	lncRNA	1.972	3.923	3.923	0.607965	8.4985e-7	Up
ENSG00000084636	COL16A1	protein_coding	1.97	3.916	3.916	-0.27322	9.3196e-06	Up
ENSG00000164442	CITED2	protein_coding	1.968	3.911	3.911	6.46124	5.4013e-15	Up
ENSG00000272444	AL118558.4	lncRNA	1.961	3.893	3.893	-1.12405	0.00068721	Up
ENSG00000261302	AC106779.1	lncRNA	1.961	3.892	3.892	-0.891133	0.00033847	Up
ENSG00000019186	CYP24A1	protein_coding	1.96	3.892	3.892	-0.449461	2.6654e-05	Up
ENSG00000269902	AC234772.2	lncRNA	1.956	3.88	3.88	-1.02344	0.00022491	Up
ENSG00000265100	AC005332.1	lncRNA	1.946	3.854	3.854	-1.15405	0.00083243	Up
ENSG00000142623	PADI1	protein_coding	1.945	3.85	3.85	-1.68053	0.0016459	Up
ENSG00000174950	CD164L2	protein_coding	1.944	3.848	3.848	-0.411814	2.7867e-05	Up
ENSG00000137331	IER3	protein_coding	1.939	3.835	3.835	4.81914	4.3966e-14	Up
ENSG00000138615	CILP	protein_coding	1.936	3.827	3.827	-0.830881	0.00041861	Up
ENSG00000196139	AKR1C3	protein_coding	1.935	3.824	3.824	-1.28247	0.00076505	Up
ENSG00000114268	PFKFB4	protein_coding	1.926	3.801	3.801	4.97044	4.3891e-14	Up
ENSG00000153253	SCN3A	protein_coding	1.925	3.798	3.798	-0.794062	7.2174e-05	Up
ENSG00000133101	CCNA1	protein_coding	1.923	3.793	3.793	-0.439307	1.6631e-05	Up
ENSG00000091482	SMPX	protein_coding	1.923	3.792	3.792	-0.420611	2.2253e-05	Up
ENSG00000124253	PCK1	protein_coding	1.922	3.79	3.79	1.88447	3.6376e-8	Up
ENSG00000123095	BHLHE41	protein_coding	1.921	3.788	3.788	3.92268	2.3512e-12	Up
ENSG00000270171	AL359881.3	lncRNA	1.921	3.787	3.787	-0.84107	0.00014749	Up
ENSG00000120129	DUSP1	protein_coding	1.919	3.783	3.783	6.0981	1.5972e-14	Up
ENSG00000234509	AP000253.1	lncRNA	1.919	3.781	3.781	-0.890638	0.00054203	Up
ENSG00000273759	AL117379.1	lncRNA	1.914	3.77	3.77	1.39658	1.1931e-06	Up
ENSG00000214652	ZNF727	protein_coding	1.914	3.768	3.768	-0.0443645	1.1393e-05	Up
ENSG00000275092	AL031710.2	lncRNA	1.911	3.761	3.761	0.342647	8.1734e-06	Up
ENSG00000102287	GABRE	protein_coding	1.906	3.747	3.747	3.11297	2.8075e-10	Up
ENSG00000173110	HSPA6	protein_coding	1.901	3.735	3.735	2.47532	9.5379e-7	Up
ENSG00000152256	PDK1	protein_coding	1.899	3.73	3.73	6.81953	1.1892e-14	Up
ENSG00000012124	CD22	protein_coding	1.892	3.711	3.711	-1.51558	0.0010502	Up
ENSG00000177464	GPR4	protein_coding	1.89	3.707	3.707	-1.68006	0.0035227	Up
ENSG00000078814	MYH7B	protein_coding	1.887	3.699	3.699	-1.24807	0.0011955	Up
ENSG00000143847	PPFIA4	protein_coding	1.885	3.694	3.694	5.40133	1.8673e-14	Up
ENSG00000229021	AL450992.1	lncRNA	1.884	3.691	3.691	-1.13967	0.001113	Up
ENSG00000128510	CPA4	protein_coding	1.884	3.691	3.691	-0.307582	2.3607e-05	Up
ENSG00000183979	NPB	protein_coding	1.881	3.683	3.683	0.0430995	5.2304e-06	Up
ENSG00000249306	LINC01411	lncRNA	1.874	3.666	3.666	1.94867	1.8242e-9	Up
ENSG00000187026	KRTAP21-2	protein_coding	1.872	3.661	3.661	-0.170807	3.1211e-05	Up
ENSG00000169427	KCNK9	protein_coding	1.872	3.66	3.66	-0.703005	0.00012079	Up
ENSG00000095932	SMIM24	protein_coding	1.871	3.658	3.658	0.0364705	5.4669e-06	Up
ENSG00000198821	CD247	protein_coding	1.861	3.633	3.633	-1.34917	0.00096986	Up
ENSG00000254290	AC124067.4	lncRNA	1.854	3.615	3.615	0.0700402	4.5426e-05	Up
ENSG00000261173	AC018845.3	lncRNA	1.852	3.609	3.609	-1.08017	0.00044475	Up
ENSG00000196268	ZNF493	protein_coding	1.848	3.599	3.599	0.589223	1.7465e-06	Up
ENSG00000272810	U91328.3	lncRNA	1.847	3.597	3.597	-0.854396	0.00045189	Up
ENSG00000250790	AC127070.2	lncRNA	1.844	3.591	3.591	-0.34776	0.00010109	Up
ENSG00000272870	AC097534.2	lncRNA	1.843	3.589	3.589	3.44366	1.0717e-11	Up
ENSG00000226686	LINC01535	lncRNA	1.839	3.578	3.578	0.269881	3.9834e-06	Up
ENSG00000196968	FUT11	protein_coding	1.838	3.575	3.575	4.50589	4.2995e-12	Up
ENSG00000122012	SV2C	protein_coding	1.836	3.569	3.569	-1.6373	0.0018221	Up
ENSG00000267498	AC007786.1	lncRNA	1.835	3.568	3.568	-1.55468	0.0015362	Up
ENSG00000237343	AC246785.3	lncRNA	1.833	3.563	3.563	-0.614955	0.00022332	Up
ENSG00000150722	PPP1R1C	protein_coding	1.831	3.559	3.559	-0.264687	1.7938e-05	Up
ENSG00000080573	COL5A3	protein_coding	1.831	3.557	3.557	-1.26498	0.0019521	Up
ENSG00000235052	AL021154.1	lncRNA	1.827	3.548	3.548	-0.917981	0.00029776	Up
ENSG00000249738	AC008691.1	lncRNA	1.823	3.538	3.538	0.24857	4.0166e-05	Up
ENSG00000130045	NXNL2	protein_coding	1.823	3.537	3.537	-0.504052	0.00011706	Up
ENSG00000104953	TLE6	protein_coding	1.822	3.535	3.535	1.82085	1.3245e-8	Up
ENSG00000100362	PVALB	protein_coding	1.822	3.535	3.535	-0.257022	3.6738e-05	Up
ENSG00000274993	AC254629.1	lncRNA	1.817	3.523	3.523	-0.466149	0.00042224	Up
ENSG00000147256	ARHGAP36	protein_coding	1.806	3.497	3.497	-1.38498	0.00081272	Up
ENSG00000268628	AL121761.1	lncRNA	1.805	3.495	3.495	-0.419566	0.00050154	Up
ENSG00000276524	AC010999.2	lncRNA	1.804	3.492	3.492	0.275955	4.0221e-06	Up
ENSG00000182885	ADGRG3	protein_coding	1.804	3.492	3.492	-0.154938	6.3557e-05	Up
ENSG00000231672	DIRC3	lncRNA	1.802	3.488	3.488	0.384414	4.8309e-06	Up
ENSG00000196867	ZFP28	protein_coding	1.802	3.487	3.487	1.18063	2.3854e-7	Up
ENSG00000058335	RASGRF1	protein_coding	1.802	3.486	3.486	2.01423	3.6754e-9	Up
ENSG00000122641	INHBA	protein_coding	1.8	3.483	3.483	-0.176061	0.00020092	Up
ENSG00000224729	PCOLCE-AS1	lncRNA	1.799	3.479	3.479	3.3204	2.9973e-11	Up
ENSG00000080031	PTPRH	protein_coding	1.798	3.478	3.478	1.4431	1.1519e-7	Up
ENSG00000099869	IGF2-AS	lncRNA	1.792	3.464	3.464	-1.43857	0.0031516	Up
ENSG00000278611	ZNF426-DT	lncRNA	1.785	3.446	3.446	0.0171233	1.5043e-05	Up
ENSG00000184599	FAM19A3	protein_coding	1.783	3.441	3.441	-0.505901	0.00016829	Up
ENSG00000197128	ZNF772	protein_coding	1.777	3.428	3.428	1.23778	9.9229e-7	Up
ENSG00000225950	NTF4	protein_coding	1.777	3.427	3.427	-1.36683	0.0014327	Up
ENSG00000128422	KRT17	protein_coding	1.776	3.425	3.425	-0.78251	0.0002904	Up
ENSG00000229474	PATL2	protein_coding	1.771	3.413	3.413	-0.941754	0.0014707	Up
ENSG00000180730	SHISA2	protein_coding	1.77	3.41	3.41	5.42448	8.4615e-14	Up
ENSG00000270332	SMC2-AS1	lncRNA	1.767	3.402	3.402	1.43135	2.478e-7	Up
ENSG00000176171	BNIP3	protein_coding	1.764	3.396	3.396	7.43938	1.8673e-14	Up
ENSG00000180596	HIST1H2BC	protein_coding	1.763	3.395	3.395	-0.332262	6.0153e-05	Up
ENSG00000125968	ID1	protein_coding	1.763	3.394	3.394	4.53191	9.7112e-13	Up
ENSG00000167749	KLK4	protein_coding	1.757	3.381	3.381	-0.0103034	1.7409e-05	Up
ENSG00000142619	PADI3	protein_coding	1.757	3.379	3.379	1.10328	3.0022e-7	Up
ENSG00000188643	S100A16	protein_coding	1.75	3.363	3.363	-1.02448	0.00028381	Up
ENSG00000237950	AL357079.1	lncRNA	1.749	3.361	3.361	-0.101417	5.6909e-05	Up
ENSG00000272991	AF129408.1	lncRNA	1.744	3.351	3.351	-1.08019	0.0017841	Up
ENSG00000167895	TMC8	protein_coding	1.744	3.348	3.348	-0.0871067	3.2217e-05	Up
ENSG00000276180	HIST1H4I	protein_coding	1.742	3.346	3.346	0.363709	1.2942e-05	Up
ENSG00000240032	LNCSRLR	lncRNA	1.742	3.345	3.345	-1.03721	0.0021141	Up
ENSG00000275613	AC243830.1	lncRNA	1.741	3.343	3.343	-1.31528	0.0033297	Up
ENSG00000184224	C11orf72	lncRNA	1.737	3.333	3.333	-1.03754	0.00058129	Up
ENSG00000166863	TAC3	protein_coding	1.734	3.326	3.326	-0.903898	0.00031918	Up
ENSG00000186952	TMEM232	protein_coding	1.73	3.316	3.316	-0.91745	0.00062978	Up
ENSG00000149090	PAMR1	protein_coding	1.729	3.314	3.314	-0.332756	4.9313e-05	Up
ENSG00000163873	GRIK3	protein_coding	1.725	3.306	3.306	-1.11082	0.0019056	Up
ENSG00000237595	LINC01275	lncRNA	1.722	3.298	3.298	-0.574479	0.00052575	Up
ENSG00000166407	LMO1	protein_coding	1.721	3.296	3.296	0.0759835	1.5135e-05	Up
ENSG00000284968	AC093827.4	lncRNA	1.72	3.294	3.294	-0.467025	0.00010568	Up
ENSG00000175084	DES	protein_coding	1.72	3.294	3.294	0.00271168	1.2147e-05	Up
ENSG00000226508	LINC01918	lncRNA	1.719	3.291	3.291	-0.192889	3.7574e-05	Up
ENSG00000270019	AC110769.2	lncRNA	1.718	3.29	3.29	-1.33152	0.0024161	Up
ENSG00000267226	AC104971.1	lncRNA	1.716	3.285	3.285	-0.0251052	8.7573e-05	Up
ENSG00000143772	ITPKB	protein_coding	1.715	3.284	3.284	-1.77043	0.0034547	Up
ENSG00000261596	AC005632.2	lncRNA	1.715	3.282	3.282	-1.31454	0.0027663	Up
ENSG00000205129	C4orf47	protein_coding	1.713	3.279	3.279	-0.177978	2.1607e-05	Up
ENSG00000189058	APOD	protein_coding	1.709	3.269	3.269	-0.170803	4.3149e-05	Up
ENSG00000174343	CHRNA9	protein_coding	1.706	3.263	3.263	-1.18578	0.0005082	Up
ENSG00000144339	TMEFF2	protein_coding	1.705	3.26	3.26	0.75862	7.9324e-7	Up
ENSG00000280383	Z95331.1	lncRNA	1.704	3.257	3.257	1.48691	1.1414e-06	Up
ENSG00000099860	GADD45B	protein_coding	1.703	3.255	3.255	4.27086	9.4954e-11	Up
ENSG00000270021	AC026691.1	lncRNA	1.701	3.252	3.252	-0.648013	0.00033865	Up
ENSG00000178522	AMBN	protein_coding	1.699	3.248	3.248	2.91242	4.2492e-10	Up
ENSG00000225783	MIAT	lncRNA	1.697	3.243	3.243	0.490372	1.7406e-05	Up
ENSG00000166473	PKD1L2	protein_coding	1.696	3.24	3.24	0.794485	1.2045e-06	Up
ENSG00000140279	DUOX2	protein_coding	1.695	3.238	3.238	-0.648692	0.00045137	Up
ENSG00000276564	AC130650.2	lncRNA	1.693	3.233	3.233	0.570435	6.9404e-06	Up
ENSG00000286061	RCAN3AS	lncRNA	1.693	3.233	3.233	-0.410086	0.00031904	Up
ENSG00000272853	AC069544.1	lncRNA	1.689	3.225	3.225	0.828128	2.7647e-06	Up
ENSG00000140465	CYP1A1	protein_coding	1.689	3.225	3.225	2.06435	1.1426e-8	Up
ENSG00000243766	HOTTIP	lncRNA	1.685	3.216	3.216	0.225214	1.9762e-05	Up
ENSG00000261360	AC010491.1	lncRNA	1.684	3.214	3.214	-0.891357	0.00038353	Up
ENSG00000272906	AL353708.3	lncRNA	1.679	3.203	3.203	1.27337	2.1015e-7	Up
ENSG00000095752	IL11	protein_coding	1.679	3.203	3.203	1.17513	1.9651e-06	Up
ENSG00000197124	ZNF682	protein_coding	1.679	3.203	3.203	-0.943875	0.00053655	Up
ENSG00000004846	ABCB5	protein_coding	1.679	3.202	3.202	-1.53462	0.0035286	Up
ENSG00000275055	AC011468.5	lncRNA	1.677	3.197	3.197	-0.746572	0.00043201	Up
ENSG00000167984	NLRC3	protein_coding	1.676	3.196	3.196	-1.59513	0.0028054	Up
ENSG00000226900	AL451069.1	lncRNA	1.675	3.194	3.194	-1.61614	0.0053502	Up
ENSG00000283959	AP002851.1	lncRNA	1.675	3.193	3.193	-1.18612	0.0029515	Up
ENSG00000183421	RIPK4	protein_coding	1.675	3.193	3.193	4.7583	4.3456e-13	Up
ENSG00000251417	AC145285.2	lncRNA	1.674	3.191	3.191	-1.43909	0.0037817	Up
ENSG00000197406	DIO3	protein_coding	1.672	3.186	3.186	-0.605272	0.00033344	Up
ENSG00000275576	AL049539.1	lncRNA	1.663	3.166	3.166	-1.037	0.0071943	Up
ENSG00000167614	TTYH1	protein_coding	1.662	3.165	3.165	-0.691369	0.00024421	Up
ENSG00000213967	ZNF726	protein_coding	1.656	3.152	3.152	0.127632	2.2124e-05	Up
ENSG00000186510	CLCNKA	protein_coding	1.656	3.152	3.152	-0.929823	0.0010687	Up
ENSG00000283122	HYMAI	lncRNA	1.654	3.147	3.147	0.714589	2.1655e-06	Up
ENSG00000272945	AL356299.2	lncRNA	1.654	3.147	3.147	-1.09482	0.00089227	Up
ENSG00000136235	GPNMB	protein_coding	1.654	3.146	3.146	0.393636	4.8769e-06	Up
ENSG00000205336	ADGRG1	protein_coding	1.654	3.146	3.146	-0.616512	0.00012618	Up
ENSG00000168209	DDIT4	protein_coding	1.653	3.146	3.146	8.11347	1.0494e-13	Up
ENSG00000205838	TTC23L	protein_coding	1.653	3.144	3.144	-0.544109	0.00028008	Up
ENSG00000253730	AC015909.2	lncRNA	1.652	3.142	3.142	0.287136	1.3473e-05	Up
ENSG00000272970	AC107294.2	lncRNA	1.651	3.141	3.141	-0.793663	0.0013841	Up
ENSG00000197013	ZNF429	protein_coding	1.65	3.139	3.139	-0.594755	0.00039051	Up
ENSG00000281406	BLACAT1	protein_coding	1.648	3.135	3.135	-1.29853	0.0011882	Up
ENSG00000284874	AC000093.1	protein_coding	1.648	3.134	3.134	-1.03786	0.0014519	Up
ENSG00000221955	SLC12A8	protein_coding	1.648	3.134	3.134	-1.367	0.0017876	Up
ENSG00000235831	BHLHE40-AS1	lncRNA	1.647	3.133	3.133	0.907644	1.889e-06	Up
ENSG00000172346	CSDC2	protein_coding	1.643	3.124	3.124	2.22151	1.0667e-8	Up
ENSG00000185247	MAGEA11	protein_coding	1.642	3.12	3.12	3.08585	3.4265e-10	Up
ENSG00000158887	MPZ	protein_coding	1.633	3.102	3.102	1.57985	6.0437e-7	Up
ENSG00000239713	APOBEC3G	protein_coding	1.632	3.1	3.1	-1.33204	0.0011503	Up
ENSG00000285884	AL022345.4	lncRNA	1.631	3.098	3.098	-0.192937	0.00015724	Up
ENSG00000187848	P2RX2	protein_coding	1.63	3.095	3.095	1.3177	1.6783e-7	Up
ENSG00000285877	AC007448.4	lncRNA	1.628	3.091	3.091	-0.555567	0.00036604	Up
ENSG00000214193	SH3D21	protein_coding	1.627	3.089	3.089	4.06415	1.5558e-11	Up
ENSG00000223949	ROR1-AS1	lncRNA	1.627	3.088	3.088	-0.350418	0.00021226	Up
ENSG00000188227	ZNF793	protein_coding	1.625	3.083	3.083	-0.422684	0.0013079	Up
ENSG00000197134	ZNF257	protein_coding	1.624	3.083	3.083	-1.20091	0.0010795	Up
ENSG00000235888	AF064858.1	lncRNA	1.624	3.081	3.081	-0.80534	0.00034516	Up
ENSG00000113140	SPARC	protein_coding	1.623	3.081	3.081	1.89349	7.1066e-8	Up
ENSG00000187837	HIST1H1C	protein_coding	1.623	3.08	3.08	4.13836	3.2043e-11	Up
ENSG00000075426	FOSL2	protein_coding	1.622	3.078	3.078	3.77419	1.5466e-11	Up
ENSG00000168298	HIST1H1E	protein_coding	1.622	3.078	3.078	-0.161545	6.8458e-05	Up
ENSG00000118137	APOA1	protein_coding	1.621	3.077	3.077	-1.20123	0.0017181	Up
ENSG00000196787	HIST1H2AG	protein_coding	1.62	3.073	3.073	1.77154	2.5255e-7	Up
ENSG00000233221	AC133785.1	lncRNA	1.619	3.071	3.071	-1.15576	0.0038522	Up
ENSG00000270083	AL021878.2	lncRNA	1.618	3.071	3.071	-0.231201	0.00015317	Up
ENSG00000170421	KRT8	protein_coding	1.614	3.062	3.062	6.08882	4.3966e-14	Up
ENSG00000213793	ZNF888	protein_coding	1.614	3.062	3.062	-0.038047	2.4187e-05	Up
ENSG00000249388	AC023794.3	lncRNA	1.613	3.059	3.059	-0.969348	0.0018614	Up
ENSG00000204389	HSPA1A	protein_coding	1.61	3.052	3.052	0.214893	0.00029553	Up
ENSG00000176907	TCIM	protein_coding	1.607	3.046	3.046	2.25384	4.9234e-8	Up
ENSG00000254207	AC100797.1	lncRNA	1.605	3.042	3.042	-1.05273	0.0011736	Up
ENSG00000271757	AP002360.2	lncRNA	1.604	3.039	3.039	-1.34906	0.0047862	Up
ENSG00000152952	PLOD2	protein_coding	1.603	3.038	3.038	8.46428	1.8626e-11	Up
ENSG00000277342	AC048344.4	lncRNA	1.602	3.036	3.036	-0.605776	0.00044458	Up
ENSG00000277767	AL442128.2	lncRNA	1.602	3.035	3.035	-0.191751	0.00027565	Up
ENSG00000255559	ZNF252P-AS1	lncRNA	1.6	3.032	3.032	-0.595176	0.00053544	Up
ENSG00000203326	ZNF525	protein_coding	1.599	3.028	3.028	-0.669307	0.00045032	Up
ENSG00000255874	LINC00346	lncRNA	1.597	3.026	3.026	0.258611	1.2485e-05	Up
ENSG00000275479	AC087741.2	lncRNA	1.596	3.023	3.023	-0.272159	0.00015994	Up
ENSG00000080166	DCT	protein_coding	1.596	3.022	3.022	1.14735	1.0026e-06	Up
ENSG00000100097	LGALS1	protein_coding	1.595	3.021	3.021	3.22826	2.6544e-10	Up
ENSG00000077274	CAPN6	protein_coding	1.595	3.02	3.02	0.388594	9.0647e-06	Up
ENSG00000114480	GBE1	protein_coding	1.594	3.019	3.019	5.42604	6.0579e-13	Up
ENSG00000285205	AL121612.2	lncRNA	1.593	3.016	3.016	1.38283	3.8108e-7	Up
ENSG00000213782	DDX47	protein_coding	1.592	3.014	3.014	1.23487	1.0741e-06	Up
ENSG00000272084	AL137127.1	lncRNA	1.59	3.01	3.01	-0.9566	0.001609	Up
ENSG00000134531	EMP1	protein_coding	1.59	3.01	3.01	2.64214	4.4541e-9	Up
ENSG00000183691	NOG	protein_coding	1.587	3.004	3.004	5.23229	3.5822e-11	Up
ENSG00000232028	AC007391.1	lncRNA	1.584	2.999	2.999	-1.10903	0.0023089	Up
ENSG00000181458	TMEM45A	protein_coding	1.584	2.997	2.997	4.82353	1.0844e-11	Up
ENSG00000114854	TNNC1	protein_coding	1.584	2.997	2.997	-0.514483	0.0002214	Up
ENSG00000251562	MALAT1	lncRNA	1.582	2.995	2.995	7.23852	6.2379e-10	Up
ENSG00000184441	AP001062.1	lncRNA	1.58	2.989	2.989	-0.00957013	4.7899e-05	Up
ENSG00000159625	DRC7	protein_coding	1.58	2.989	2.989	-0.759139	0.00093768	Up
ENSG00000242866	STRC	protein_coding	1.579	2.987	2.987	-1.02406	0.0015761	Up
ENSG00000225880	LINC00115	lncRNA	1.575	2.979	2.979	1.75178	1.4008e-7	Up
ENSG00000171223	JUNB	protein_coding	1.574	2.978	2.978	4.40197	2.4725e-12	Up
ENSG00000225833	AC097625.1	lncRNA	1.574	2.977	2.977	-0.771284	0.00098843	Up
ENSG00000158050	DUSP2	protein_coding	1.573	2.975	2.975	-1.49576	0.0045419	Up
ENSG00000268364	SMC5-AS1	lncRNA	1.572	2.974	2.974	0.198895	7.0216e-05	Up
ENSG00000226979	LTA	protein_coding	1.572	2.972	2.972	-0.506312	0.00089894	Up
ENSG00000271387	AL445228.2	lncRNA	1.57	2.969	2.969	0.500672	1.2147e-05	Up
ENSG00000260625	AC026471.2	lncRNA	1.567	2.962	2.962	0.470561	4.6602e-05	Up
ENSG00000253552	HOXA-AS2	lncRNA	1.566	2.962	2.962	3.57228	1.7927e-9	Up
ENSG00000229422	AL512625.2	lncRNA	1.566	2.96	2.96	1.01532	2.2253e-06	Up
ENSG00000184786	TCTE3	protein_coding	1.566	2.96	2.96	3.51621	5.4621e-9	Up
ENSG00000108551	RASD1	protein_coding	1.565	2.959	2.959	-0.878849	0.00083797	Up
ENSG00000243083	LINC00870	lncRNA	1.564	2.958	2.958	-0.410759	0.00021403	Up
ENSG00000238198	AL357055.3	lncRNA	1.562	2.953	2.953	-0.983615	0.0015028	Up
ENSG00000134443	GRP	protein_coding	1.562	2.952	2.952	-1.68022	0.0048106	Up
ENSG00000180422	LINC00304	lncRNA	1.561	2.951	2.951	-1.57473	0.012838	Up
ENSG00000172794	RAB37	protein_coding	1.556	2.941	2.941	-0.781801	0.00078074	Up
ENSG00000196639	HRH1	protein_coding	1.556	2.941	2.941	-0.606986	0.00084901	Up
ENSG00000138395	CDK15	protein_coding	1.554	2.936	2.936	-0.637339	0.00019288	Up
ENSG00000281358	RASSF1-AS1	lncRNA	1.551	2.93	2.93	-0.524415	0.00043771	Up
ENSG00000227014	AC007285.1	lncRNA	1.544	2.916	2.916	-0.983719	0.0029748	Up
ENSG00000275198	AL512791.2	lncRNA	1.542	2.913	2.913	-0.515079	0.0003982	Up
ENSG00000272205	AL451050.2	lncRNA	1.542	2.912	2.912	0.363333	1.7351e-05	Up
ENSG00000261226	AC092384.3	lncRNA	1.539	2.907	2.907	0.955924	1.9817e-06	Up
ENSG00000198576	ARC	protein_coding	1.539	2.906	2.906	2.65868	9.09e-9	Up
ENSG00000118515	SGK1	protein_coding	1.539	2.905	2.905	3.32826	1.8109e-10	Up
ENSG00000166924	NYAP1	protein_coding	1.532	2.892	2.892	1.8809	9.012e-8	Up
ENSG00000177807	KCNJ10	protein_coding	1.53	2.889	2.889	-0.178038	0.0002178	Up
ENSG00000274220	AC009163.6	lncRNA	1.526	2.879	2.879	-0.393439	0.00039272	Up
ENSG00000236384	LINC00479	lncRNA	1.525	2.877	2.877	-1.20097	0.0020786	Up
ENSG00000185269	NOTUM	protein_coding	1.523	2.873	2.873	1.95358	1.6194e-7	Up
ENSG00000177181	RIMKLA	protein_coding	1.52	2.868	2.868	3.43658	1.7632e-10	Up
ENSG00000106031	HOXA13	protein_coding	1.519	2.865	2.865	6.37621	2.6088e-13	Up
ENSG00000213760	ATP6V1G2	protein_coding	1.517	2.862	2.862	2.13836	7.2417e-8	Up
ENSG00000204086	RPA4	protein_coding	1.516	2.86	2.86	2.75028	6.5534e-9	Up
ENSG00000110002	VWA5A	protein_coding	1.516	2.86	2.86	2.04481	1.1475e-7	Up
ENSG00000172752	COL6A5	protein_coding	1.514	2.855	2.855	0.0412649	8.2722e-05	Up
ENSG00000233296	AC092159.2	lncRNA	1.511	2.85	2.85	-1.20118	0.0021356	Up
ENSG00000214919	AC104472.1	lncRNA	1.508	2.845	2.845	-1.08027	0.0018166	Up
ENSG00000135406	PRPH	protein_coding	1.506	2.841	2.841	1.23793	2.7559e-06	Up
ENSG00000182379	NXPH4	protein_coding	1.505	2.839	2.839	5.04769	5.1169e-12	Up
ENSG00000278743	AC087239.1	lncRNA	1.505	2.838	2.838	-1.1388	0.010757	Up
ENSG00000255346	NOX5	protein_coding	1.502	2.833	2.833	-1.14013	0.0028114	Up
ENSG00000266970	AC061992.1	lncRNA	1.502	2.832	2.832	-0.24045	0.00011706	Up
ENSG00000272046	AL445647.1	lncRNA	1.501	2.831	2.831	0.52945	1.6825e-05	Up
ENSG00000254477	AP000640.1	lncRNA	1.501	2.831	2.831	-1.29842	0.0060327	Up
ENSG00000189223	PAX8-AS1	lncRNA	1.5	2.828	2.828	-1.03808	0.0012385	Up
ENSG00000120885	CLU	protein_coding	1.499	2.826	2.826	5.50077	6.5117e-12	Up
ENSG00000077327	SPAG6	protein_coding	1.497	2.822	2.822	-1.5347	0.0072814	Up
ENSG00000163898	LIPH	protein_coding	1.495	2.819	2.819	-0.595627	0.00026979	Up
ENSG00000153237	CCDC148	protein_coding	1.491	2.811	2.811	-0.457492	0.00055181	Up
ENSG00000162772	ATF3	protein_coding	1.491	2.81	2.81	7.91763	1.0142e-11	Up
ENSG00000170703	TTLL6	protein_coding	1.49	2.81	2.81	0.56453	1.1688e-05	Up
ENSG00000259977	AL121578.3	lncRNA	1.488	2.804	2.804	-0.403061	0.00034857	Up
ENSG00000267577	AC010327.3	lncRNA	1.486	2.802	2.802	-0.878727	0.00098843	Up
ENSG00000229896	AL157373.2	lncRNA	1.485	2.799	2.799	-0.943112	0.0010167	Up
ENSG00000274213	AC015912.3	lncRNA	1.483	2.796	2.796	-0.637494	0.0030368	Up
ENSG00000010327	STAB1	protein_coding	1.483	2.796	2.796	-0.680204	0.00060253	Up
ENSG00000270419	CAHM	lncRNA	1.483	2.795	2.795	1.07927	1.0514e-05	Up
ENSG00000262075	AC174065.1	lncRNA	1.48	2.79	2.79	-0.065291	0.0003022	Up
ENSG00000177335	C8orf31	lncRNA	1.48	2.79	2.79	-0.73697	0.0015686	Up
ENSG00000129682	FGF13	protein_coding	1.479	2.787	2.787	1.76017	8.5024e-7	Up
ENSG00000224687	RASAL2-AS1	lncRNA	1.478	2.785	2.785	0.552077	1.2132e-05	Up
ENSG00000169548	ZNF280A	protein_coding	1.478	2.785	2.785	-0.358769	0.00015354	Up
ENSG00000268279	AC090004.1	protein_coding	1.475	2.78	2.78	-0.0714313	0.00042313	Up
ENSG00000260641	AC114811.2	lncRNA	1.472	2.774	2.774	-0.72525	0.0011141	Up
ENSG00000144655	CSRNP1	protein_coding	1.471	2.771	2.771	4.17081	3.4113e-11	Up
ENSG00000172687	ZNF738	protein_coding	1.469	2.768	2.768	2.69072	5.1689e-8	Up
ENSG00000169499	PLEKHA2	protein_coding	1.468	2.767	2.767	3.52445	6.1873e-10	Up
ENSG00000064300	NGFR	protein_coding	1.467	2.765	2.765	3.19294	7.666e-10	Up
ENSG00000229869	AL359878.2	lncRNA	1.466	2.763	2.763	-0.208764	0.00026956	Up
ENSG00000064787	BCAS1	protein_coding	1.466	2.762	2.762	0.77719	1.2372e-05	Up
ENSG00000198797	BRINP2	protein_coding	1.464	2.759	2.759	-0.0730007	9.7938e-05	Up
ENSG00000014914	MTMR11	protein_coding	1.462	2.755	2.755	3.39512	6.2379e-10	Up
ENSG00000198910	L1CAM	protein_coding	1.462	2.755	2.755	2.45307	1.3498e-8	Up
ENSG00000250286	AC021491.2	lncRNA	1.461	2.752	2.752	-0.448661	0.0013637	Up
ENSG00000101203	COL20A1	protein_coding	1.46	2.751	2.751	-1.05244	0.0016308	Up
ENSG00000149970	CNKSR2	protein_coding	1.458	2.748	2.748	-0.829695	0.0046824	Up
ENSG00000260526	AC109347.1	lncRNA	1.457	2.746	2.746	1.58124	1.0426e-06	Up
ENSG00000273702	AC091271.1	lncRNA	1.456	2.744	2.744	1.36838	7.2274e-7	Up
ENSG00000163565	IFI16	protein_coding	1.456	2.743	2.743	-0.358655	0.00023068	Up
ENSG00000232903	LINC01166	lncRNA	1.454	2.74	2.74	-0.154568	0.00026741	Up
ENSG00000274184	AC011815.2	lncRNA	1.454	2.739	2.739	-0.680381	0.00098764	Up
ENSG00000162779	AXDND1	protein_coding	1.451	2.735	2.735	-0.95607	0.0055795	Up
ENSG00000188672	RHCE	protein_coding	1.451	2.733	2.733	1.60286	1.3324e-06	Up
ENSG00000139714	MORN3	protein_coding	1.448	2.728	2.728	-0.514396	0.00083815	Up
ENSG00000276900	AC023157.3	lncRNA	1.447	2.727	2.727	1.25206	1.3463e-05	Up
ENSG00000226051	ZNF503-AS1	lncRNA	1.446	2.724	2.724	0.0763113	7.008e-05	Up
ENSG00000176236	C10orf111	lncRNA	1.444	2.72	2.72	-0.615845	0.0014882	Up
ENSG00000135144	DTX1	protein_coding	1.442	2.718	2.718	0.540971	2.9829e-05	Up
ENSG00000275765	AC091982.3	lncRNA	1.441	2.715	2.715	0.766367	1.4121e-05	Up
ENSG00000272079	AC004233.3	lncRNA	1.441	2.715	2.715	-0.605737	0.00098118	Up
ENSG00000174403	MIR1-1HG-AS1	lncRNA	1.44	2.714	2.714	1.47198	5.3205e-7	Up
ENSG00000242808	SOX2-OT	lncRNA	1.439	2.712	2.712	-0.995879	0.0028133	Up
ENSG00000175189	INHBC	protein_coding	1.437	2.708	2.708	-0.969441	0.0017231	Up
ENSG00000106113	CRHR2	protein_coding	1.437	2.707	2.707	-0.544779	0.0036932	Up
ENSG00000238260	AL513320.1	lncRNA	1.436	2.706	2.706	-0.411583	0.0004489	Up
ENSG00000253669	GASAL1	lncRNA	1.436	2.705	2.705	0.659804	1.4946e-05	Up
ENSG00000272341	AL137003.2	lncRNA	1.434	2.702	2.702	3.41538	1.5441e-9	Up
ENSG00000178538	CA8	protein_coding	1.434	2.701	2.701	5.54263	5.8475e-13	Up
ENSG00000275441	AC020765.2	lncRNA	1.433	2.7	2.7	0.662914	2.4539e-05	Up
ENSG00000128564	VGF	protein_coding	1.433	2.7	2.7	0.157179	8.9799e-05	Up
ENSG00000166428	PLD4	protein_coding	1.432	2.697	2.697	-1.282	0.0050459	Up
ENSG00000267568	AC016168.2	lncRNA	1.43	2.695	2.695	-0.930583	0.003163	Up
ENSG00000179761	PIPOX	protein_coding	1.429	2.693	2.693	-0.087492	0.00018328	Up
ENSG00000186026	ZNF284	protein_coding	1.427	2.689	2.689	-0.723967	0.0012848	Up
ENSG00000158825	CDA	protein_coding	1.426	2.686	2.686	1.60522	1.0549e-06	Up
ENSG00000145780	FEM1C	protein_coding	1.425	2.686	2.686	5.59234	1.207e-12	Up
ENSG00000138061	CYP1B1	protein_coding	1.425	2.684	2.684	1.86142	4.5099e-7	Up
ENSG00000196406	SPANXD	protein_coding	1.423	2.682	2.682	-0.495791	0.0012266	Up
ENSG00000180573	HIST1H2AC	protein_coding	1.421	2.678	2.678	2.44164	3.96e-8	Up
ENSG00000164404	GDF9	protein_coding	1.418	2.672	2.672	1.66904	4.1548e-06	Up
ENSG00000267216	AC020915.1	protein_coding	1.418	2.671	2.671	0.667212	2.2552e-05	Up
ENSG00000272787	AC253536.6	lncRNA	1.417	2.671	2.671	1.2225	2.0544e-06	Up
ENSG00000198400	NTRK1	protein_coding	1.417	2.671	2.671	-0.0747515	0.00047696	Up
ENSG00000205293	LINC01602	lncRNA	1.417	2.67	2.67	2.2643	7.7523e-8	Up
ENSG00000124785	NRN1	protein_coding	1.417	2.67	2.67	7.12636	9.1558e-13	Up
ENSG00000117318	ID3	protein_coding	1.417	2.669	2.669	6.88424	9.2572e-13	Up
ENSG00000148357	HMCN2	protein_coding	1.416	2.669	2.669	-0.324413	0.00023714	Up
ENSG00000181885	CLDN7	protein_coding	1.416	2.668	2.668	0.937268	8.7431e-06	Up
ENSG00000161149	TUBA3FP	lncRNA	1.415	2.666	2.666	-1.13986	0.0053023	Up
ENSG00000138119	MYOF	protein_coding	1.415	2.666	2.666	1.51104	7.9324e-7	Up
ENSG00000249087	ZNF436-AS1	lncRNA	1.414	2.665	2.665	3.80932	1.6123e-10	Up
ENSG00000129521	EGLN3	protein_coding	1.413	2.663	2.663	5.51029	2.9066e-12	Up
ENSG00000167748	KLK1	protein_coding	1.413	2.663	2.663	0.867838	1.4552e-05	Up
ENSG00000225595	LINC01623	lncRNA	1.412	2.661	2.661	-0.280796	0.00046772	Up
ENSG00000273248	AC010997.5	lncRNA	1.412	2.66	2.66	-1.2005	0.0082606	Up
ENSG00000224358	TMCO1-AS1	lncRNA	1.41	2.657	2.657	0.199128	0.00019605	Up
ENSG00000247675	LRP4-AS1	lncRNA	1.409	2.656	2.656	0.597189	3.3049e-05	Up
ENSG00000171450	CDK5R2	protein_coding	1.409	2.656	2.656	-0.162726	0.00026188	Up
ENSG00000163462	TRIM46	protein_coding	1.408	2.654	2.654	0.528457	6.6314e-05	Up
ENSG00000182264	IZUMO1	protein_coding	1.407	2.652	2.652	0.298357	9.6302e-05	Up
ENSG00000182472	CAPN12	protein_coding	1.407	2.651	2.651	2.26077	1.2115e-7	Up
ENSG00000164949	GEM	protein_coding	1.405	2.648	2.648	3.77856	6.1933e-10	Up
ENSG00000141738	GRB7	protein_coding	1.405	2.648	2.648	-0.340638	0.00031202	Up
ENSG00000253161	LINC01605	lncRNA	1.404	2.646	2.646	2.40022	3.8385e-8	Up
ENSG00000164929	BAALC	protein_coding	1.403	2.644	2.644	0.263175	5.9452e-05	Up
ENSG00000132518	GUCY2D	protein_coding	1.402	2.643	2.643	-1.31516	0.0043127	Up
ENSG00000181722	ZBTB20	protein_coding	1.401	2.641	2.641	0.421491	5.8102e-05	Up
ENSG00000203650	LINC01285	lncRNA	1.4	2.639	2.639	1.96737	2.307e-7	Up
ENSG00000147872	PLIN2	protein_coding	1.398	2.635	2.635	5.31026	1.8045e-12	Up
ENSG00000146151	HMGCLL1	protein_coding	1.397	2.634	2.634	1.06951	1.3532e-05	Up
ENSG00000234028	EIF2AK3-DT	lncRNA	1.397	2.633	2.633	2.46402	1.3306e-7	Up
ENSG00000173406	DAB1	protein_coding	1.396	2.631	2.631	1.83029	2.7832e-7	Up
ENSG00000276517	AL133243.3	lncRNA	1.395	2.629	2.629	-0.39361	0.00067366	Up
ENSG00000103184	SEC14L5	protein_coding	1.394	2.628	2.628	-1.10967	0.0040661	Up
ENSG00000262155	LINC02175	lncRNA	1.392	2.624	2.624	-0.806148	0.0032289	Up
ENSG00000187902	SHISA7	protein_coding	1.391	2.623	2.623	-0.969974	0.0082127	Up
ENSG00000254369	HOXA-AS3	lncRNA	1.39	2.621	2.621	1.51358	1.7894e-06	Up
ENSG00000236194	AC099811.1	lncRNA	1.389	2.619	2.619	-1.24858	0.0059567	Up
ENSG00000160801	PTH1R	protein_coding	1.389	2.619	2.619	1.6451	4.203e-7	Up
ENSG00000114270	COL7A1	protein_coding	1.389	2.618	2.618	4.03596	2.1165e-10	Up
ENSG00000272374	Z97832.2	lncRNA	1.388	2.618	2.618	-0.658214	0.0015756	Up
ENSG00000252690	AC105339.2	lncRNA	1.387	2.616	2.616	2.32824	1.2341e-7	Up
ENSG00000272973	AP000350.5	lncRNA	1.386	2.614	2.614	1.34064	2.0704e-06	Up
ENSG00000168754	FAM178B	protein_coding	1.385	2.613	2.613	-1.51485	0.0086099	Up
ENSG00000274895	AC011700.1	lncRNA	1.384	2.61	2.61	-1.33187	0.0099341	Up
ENSG00000275763	C18orf65	lncRNA	1.382	2.607	2.607	-0.9172	0.0012747	Up
ENSG00000238287	AL603839.3	lncRNA	1.381	2.604	2.604	0.0525005	0.00077194	Up
ENSG00000122884	P4HA1	protein_coding	1.379	2.6	2.6	7.82634	2.1735e-10	Up
ENSG00000227060	LINC00629	lncRNA	1.378	2.599	2.599	0.914074	1.5722e-05	Up
ENSG00000270638	AL023806.1	lncRNA	1.375	2.594	2.594	-0.955864	0.0057499	Up
ENSG00000168267	PTF1A	protein_coding	1.375	2.594	2.594	-1.12431	0.0061674	Up
ENSG00000244405	ETV5	protein_coding	1.374	2.592	2.592	-0.420602	0.00039272	Up
ENSG00000170909	OSCAR	protein_coding	1.373	2.59	2.59	-0.282074	0.0010684	Up
ENSG00000269938	AC068790.2	lncRNA	1.373	2.589	2.589	-1.1848	0.010697	Up
ENSG00000119411	BSPRY	protein_coding	1.37	2.585	2.585	1.86583	3.1449e-7	Up
ENSG00000159640	ACE	protein_coding	1.367	2.579	2.579	1.64324	1.2128e-06	Up
ENSG00000179774	ATOH7	protein_coding	1.367	2.579	2.579	-0.169397	0.00032475	Up
ENSG00000273002	AL355388.2	lncRNA	1.364	2.574	2.574	0.792894	2.9968e-05	Up
ENSG00000116299	KIAA1324	protein_coding	1.362	2.571	2.571	0.658612	1.3598e-05	Up
ENSG00000156587	UBE2L6	protein_coding	1.362	2.57	2.57	2.78833	2.7637e-8	Up
ENSG00000272948	AP001412.1	lncRNA	1.361	2.569	2.569	-0.0314524	0.0010684	Up
ENSG00000244459	AC147067.1	lncRNA	1.36	2.567	2.567	-1.03805	0.002725	Up
ENSG00000061656	SPAG4	protein_coding	1.359	2.565	2.565	2.84864	1.6678e-8	Up
ENSG00000259736	CRTC3-AS1	lncRNA	1.358	2.563	2.563	-0.69089	0.0023181	Up
ENSG00000049249	TNFRSF9	protein_coding	1.358	2.563	2.563	0.847964	6.8469e-06	Up
ENSG00000256232	LINC02387	lncRNA	1.357	2.562	2.562	0.367988	7.4483e-05	Up
ENSG00000282787	AL157888.1	lncRNA	1.357	2.561	2.561	-1.23262	0.0080752	Up
ENSG00000132026	RTBDN	protein_coding	1.357	2.561	2.561	-0.648035	0.0012945	Up
ENSG00000187800	PEAR1	protein_coding	1.357	2.561	2.561	-1.09465	0.0057044	Up
ENSG00000251259	AC004069.1	lncRNA	1.355	2.557	2.557	0.681452	1.9941e-05	Up
ENSG00000273320	AC007032.1	lncRNA	1.354	2.557	2.557	-0.00335695	0.00017939	Up
ENSG00000255458	AC108471.2	lncRNA	1.354	2.557	2.557	-0.074263	0.00062344	Up
ENSG00000167232	ZNF91	protein_coding	1.354	2.556	2.556	0.774506	1.2132e-05	Up
ENSG00000275532	AC006449.2	lncRNA	1.353	2.554	2.554	0.590243	5.4652e-05	Up
ENSG00000184925	LCN12	protein_coding	1.35	2.549	2.549	-0.56405	0.0018523	Up
ENSG00000142606	MMEL1	protein_coding	1.349	2.547	2.547	-0.281921	0.0009109	Up
ENSG00000173267	SNCG	protein_coding	1.346	2.542	2.542	3.10387	3.6535e-9	Up
ENSG00000168314	MOBP	protein_coding	1.346	2.541	2.541	-1.45794	0.014648	Up
ENSG00000109046	WSB1	protein_coding	1.345	2.54	2.54	7.8014	4.9405e-12	Up
ENSG00000100867	DHRS2	protein_coding	1.345	2.54	2.54	3.59442	7.4022e-9	Up
ENSG00000185022	MAFF	protein_coding	1.345	2.54	2.54	2.77839	1.2435e-8	Up
ENSG00000173531	MST1	protein_coding	1.344	2.538	2.538	3.18038	5.2608e-9	Up
ENSG00000136883	KIF12	protein_coding	1.343	2.537	2.537	2.27371	1.03e-7	Up
ENSG00000165409	TSHR	protein_coding	1.342	2.536	2.536	-1.28184	0.0054381	Up
ENSG00000187193	MT1X	protein_coding	1.339	2.529	2.529	2.78031	2.0563e-8	Up
ENSG00000159784	FAM131B	protein_coding	1.339	2.529	2.529	2.266	5.744e-8	Up
ENSG00000234928	LINC01659	lncRNA	1.338	2.528	2.528	-1.18503	0.0067335	Up
ENSG00000277399	GPR179	protein_coding	1.338	2.527	2.527	-0.265475	0.00058298	Up
ENSG00000276337	AC105429.1	lncRNA	1.337	2.527	2.527	2.21562	6.3047e-7	Up
ENSG00000226819	MEIS1-AS3	lncRNA	1.337	2.526	2.526	-0.495951	0.0015444	Up
ENSG00000176593	AC008969.1	lncRNA	1.335	2.522	2.522	-0.367097	0.00046947	Up
ENSG00000278467	AC138393.3	lncRNA	1.335	2.522	2.522	-0.942926	0.0027874	Up
ENSG00000234311	AL451069.3	lncRNA	1.333	2.519	2.519	-1.0662	0.0051101	Up
ENSG00000188785	ZNF548	protein_coding	1.332	2.518	2.518	2.19407	2.1015e-7	Up
ENSG00000124216	SNAI1	protein_coding	1.332	2.518	2.518	1.64013	4.3275e-06	Up
ENSG00000231105	AL031728.1	lncRNA	1.331	2.516	2.516	-0.457017	0.00096052	Up
ENSG00000259921	AC022819.1	lncRNA	1.331	2.516	2.516	-0.983207	0.0028981	Up
ENSG00000285077	AC091057.6	protein_coding	1.331	2.516	2.516	2.15944	3.4859e-7	Up
ENSG00000110042	DTX4	protein_coding	1.33	2.514	2.514	0.336185	0.00011575	Up
ENSG00000166923	GREM1	protein_coding	1.33	2.514	2.514	-1.42134	0.015068	Up
ENSG00000246662	LINC00535	lncRNA	1.329	2.512	2.512	-0.241202	0.0021865	Up
ENSG00000171954	CYP4F22	protein_coding	1.328	2.511	2.511	2.25028	9.4985e-8	Up
ENSG00000067066	SP100	protein_coding	1.327	2.509	2.509	-0.30783	0.00049127	Up
ENSG00000143502	SUSD4	protein_coding	1.326	2.507	2.507	1.50922	1.4568e-06	Up
ENSG00000283839	AC096667.1	lncRNA	1.326	2.506	2.506	-0.0374511	0.0017412	Up
ENSG00000259820	AC083843.3	lncRNA	1.325	2.506	2.506	5.05355	2.1165e-10	Up
ENSG00000104765	BNIP3L	protein_coding	1.325	2.506	2.506	6.60224	1.2723e-11	Up
ENSG00000160539	PLPP7	protein_coding	1.325	2.506	2.506	1.41818	3.0127e-06	Up
ENSG00000159224	GIP	protein_coding	1.325	2.505	2.505	-0.564575	0.00083032	Up
ENSG00000157343	ARMC12	protein_coding	1.323	2.503	2.503	-0.504645	0.0011212	Up
ENSG00000160321	ZNF208	protein_coding	1.323	2.502	2.502	-0.86709	0.0017421	Up
ENSG00000231890	DARS-AS1	lncRNA	1.322	2.499	2.499	1.56178	1.2272e-06	Up
ENSG00000278828	HIST1H3H	protein_coding	1.322	2.499	2.499	0.533158	4.9512e-05	Up
ENSG00000276075	AC027682.6	lncRNA	1.321	2.499	2.499	-0.516489	0.0068346	Up
ENSG00000257815	AC025159.1	lncRNA	1.321	2.498	2.498	2.63711	4.6595e-8	Up
ENSG00000262001	DLGAP1-AS2	lncRNA	1.321	2.498	2.498	-0.564417	0.0021118	Up
ENSG00000221923	ZNF880	protein_coding	1.321	2.498	2.498	0.879147	1.5445e-05	Up
ENSG00000266473	AC007448.3	lncRNA	1.32	2.497	2.497	-0.170648	0.00044475	Up
ENSG00000271869	AC026979.2	lncRNA	1.318	2.494	2.494	0.213092	0.00036924	Up
ENSG00000272008	AL139274.2	lncRNA	1.317	2.492	2.492	-0.830378	0.0052116	Up
ENSG00000178401	DNAJC22	protein_coding	1.316	2.489	2.489	3.47885	1.7107e-9	Up
ENSG00000272980	Z94721.2	lncRNA	1.314	2.487	2.487	-0.968772	0.0061454	Up
ENSG00000245904	AC025164.1	lncRNA	1.314	2.486	2.486	0.0699185	0.0002585	Up
ENSG00000272301	AP002360.3	lncRNA	1.314	2.486	2.486	0.166135	0.00039838	Up
ENSG00000138823	MTTP	protein_coding	1.314	2.486	2.486	-0.184567	0.0016852	Up
ENSG00000106633	GCK	protein_coding	1.314	2.486	2.486	-0.66	0.0054182	Up
ENSG00000116883	AL591845.1	lncRNA	1.313	2.485	2.485	2.38714	2.5004e-7	Up
ENSG00000230084	AC006059.1	lncRNA	1.313	2.485	2.485	-0.956519	0.0054319	Up
ENSG00000166446	CDYL2	protein_coding	1.311	2.48	2.48	1.09097	6.7263e-05	Up
ENSG00000273723	AL139089.1	lncRNA	1.309	2.478	2.478	1.73751	1.7288e-06	Up
ENSG00000225975	LINC01534	lncRNA	1.309	2.477	2.477	0.480082	7.3953e-05	Up
ENSG00000180257	ZNF816	protein_coding	1.307	2.474	2.474	-0.670187	0.0019695	Up
ENSG00000140986	RPL3L	protein_coding	1.307	2.474	2.474	-0.616089	0.0021322	Up
ENSG00000250303	AP002884.1	lncRNA	1.306	2.473	2.473	-0.298705	0.00089312	Up
ENSG00000276966	HIST1H4E	protein_coding	1.306	2.473	2.473	-0.841242	0.0061679	Up
ENSG00000187690	CXorf67	protein_coding	1.304	2.469	2.469	-0.805711	0.0046094	Up
ENSG00000271857	AL096865.1	lncRNA	1.303	2.467	2.467	0.834736	2.6616e-05	Up
ENSG00000266998	AC111182.1	lncRNA	1.303	2.467	2.467	-0.375622	0.0031627	Up
ENSG00000274667	AC090517.2	lncRNA	1.3	2.463	2.463	-0.983067	0.0048106	Up
ENSG00000185837	HDHD5-AS1	lncRNA	1.299	2.46	2.46	0.872579	3.4147e-05	Up
ENSG00000223865	HLA-DPB1	protein_coding	1.299	2.46	2.46	1.79495	9.071e-7	Up
ENSG00000237440	AC008554.1	protein_coding	1.297	2.457	2.457	0.639929	0.0001028	Up
ENSG00000143878	RHOB	protein_coding	1.294	2.452	2.452	8.39322	8.8335e-11	Up
ENSG00000250012	AC079848.1	lncRNA	1.292	2.449	2.449	-0.438799	0.0016463	Up
ENSG00000067840	PDZD4	protein_coding	1.292	2.448	2.448	5.15196	1.0393e-11	Up
ENSG00000170525	PFKFB3	protein_coding	1.291	2.447	2.447	6.54393	2.5426e-12	Up
ENSG00000246982	Z84485.1	lncRNA	1.29	2.446	2.446	2.32736	1.8435e-7	Up
ENSG00000136826	KLF4	protein_coding	1.29	2.446	2.446	3.63948	1.7523e-9	Up
ENSG00000165092	ALDH1A1	protein_coding	1.29	2.445	2.445	0.296805	6.0454e-05	Up
ENSG00000261159	AC112484.3	lncRNA	1.287	2.441	2.441	-0.384055	0.0012035	Up
ENSG00000273139	AC007663.3	lncRNA	1.287	2.44	2.44	-0.917712	0.0034734	Up
ENSG00000173221	GLRX	protein_coding	1.286	2.438	2.438	4.97208	2.3695e-10	Up
ENSG00000137801	THBS1	protein_coding	1.285	2.438	2.438	-0.515099	0.0018221	Up
ENSG00000130303	BST2	protein_coding	1.282	2.432	2.432	1.14799	4.7064e-06	Up
ENSG00000155265	GOLGA7B	protein_coding	1.281	2.43	2.43	0.433914	0.00021444	Up
ENSG00000229611	AL354707.2	lncRNA	1.279	2.426	2.426	0.107441	0.00040955	Up
ENSG00000253746	AC091182.2	lncRNA	1.278	2.426	2.426	0.201416	0.00053824	Up
ENSG00000171649	ZIK1	protein_coding	1.278	2.426	2.426	-1.23329	0.004578	Up
ENSG00000233006	MIR3936HG	lncRNA	1.278	2.425	2.425	1.24528	8.3253e-06	Up
ENSG00000270061	AC068790.5	lncRNA	1.278	2.425	2.425	-0.877962	0.011945	Up
ENSG00000149925	ALDOA	protein_coding	1.276	2.422	2.422	4.09263	2.6544e-10	Up
ENSG00000140015	KCNH5	protein_coding	1.276	2.422	2.422	-0.614875	0.0033118	Up
ENSG00000179743	AL450998.2	lncRNA	1.275	2.42	2.42	4.81997	4.038e-11	Up
ENSG00000170379	TCAF2	protein_coding	1.275	2.419	2.419	1.4224	1.9795e-06	Up
ENSG00000249898	MCPH1-AS1	lncRNA	1.274	2.419	2.419	-0.769422	0.0065132	Up
ENSG00000274677	AC040169.3	lncRNA	1.274	2.418	2.418	-1.09539	0.0088919	Up
ENSG00000277831	AL138960.1	lncRNA	1.273	2.417	2.417	-0.169164	0.00058513	Up
ENSG00000271127	AP000526.1	lncRNA	1.273	2.417	2.417	-0.829428	0.0036276	Up
ENSG00000269959	SPACA6P-AS	lncRNA	1.269	2.41	2.41	-0.956557	0.0049931	Up
ENSG00000267365	KCNJ2-AS1	lncRNA	1.268	2.409	2.409	0.103041	0.00041828	Up
ENSG00000269951	AC090181.2	lncRNA	1.267	2.407	2.407	1.45877	2.2931e-06	Up
ENSG00000177337	DLGAP1-AS1	lncRNA	1.267	2.407	2.407	-0.606134	0.0046867	Up
ENSG00000196646	ZNF136	protein_coding	1.267	2.406	2.406	2.16948	5.0335e-7	Up
ENSG00000269926	DDIT4-AS1	lncRNA	1.266	2.404	2.404	1.31498	4.6312e-05	Up
ENSG00000269935	AC092720.2	lncRNA	1.266	2.404	2.404	-0.818705	0.0039258	Up
ENSG00000100385	IL2RB	protein_coding	1.264	2.402	2.402	-1.05232	0.0057044	Up
ENSG00000283183	AC116565.1	lncRNA	1.264	2.401	2.401	0.101519	0.00038782	Up
ENSG00000177606	JUN	protein_coding	1.262	2.399	2.399	9.64789	6.0798e-11	Up
ENSG00000278238	AL359513.1	lncRNA	1.261	2.397	2.397	1.87131	2.2036e-06	Up
ENSG00000246863	AC012377.1	lncRNA	1.261	2.397	2.397	-1.23296	0.0089036	Up
ENSG00000276791	AC092117.1	lncRNA	1.261	2.396	2.396	1.36307	5.1145e-06	Up
ENSG00000248174	LINC02268	lncRNA	1.26	2.395	2.395	0.7229	3.2852e-05	Up
ENSG00000276698	AL136295.6	lncRNA	1.259	2.394	2.394	-0.626995	0.002371	Up
ENSG00000257178	AC103702.1	lncRNA	1.259	2.393	2.393	-0.594928	0.0020009	Up
ENSG00000254815	AP006284.1	lncRNA	1.258	2.392	2.392	2.62518	3.7209e-7	Up
ENSG00000087494	PTHLH	protein_coding	1.255	2.387	2.387	0.733872	3.707e-05	Up
ENSG00000269925	Z98884.2	lncRNA	1.255	2.386	2.386	-0.735614	0.003859	Up
ENSG00000203684	IBA57-DT	lncRNA	1.253	2.384	2.384	0.588027	5.8959e-05	Up
ENSG00000074211	PPP2R2C	protein_coding	1.253	2.384	2.384	3.82036	2.2098e-9	Up
ENSG00000160408	ST6GALNAC6	protein_coding	1.253	2.384	2.384	-0.514234	0.0033371	Up
ENSG00000130822	PNCK	protein_coding	1.253	2.383	2.383	1.18369	9.1076e-06	Up
ENSG00000100346	CACNA1I	protein_coding	1.251	2.381	2.381	1.32617	1.0716e-05	Up
ENSG00000256894	AC022509.3	lncRNA	1.248	2.376	2.376	-0.916792	0.0044688	Up
ENSG00000278916	CEP83-DT	lncRNA	1.248	2.374	2.374	1.50644	3.1133e-05	Up
ENSG00000103196	CRISPLD2	protein_coding	1.247	2.374	2.374	1.04407	2.3884e-05	Up
ENSG00000177301	KCNA2	protein_coding	1.247	2.373	2.373	1.46515	2.1376e-06	Up
ENSG00000145623	OSMR	protein_coding	1.246	2.372	2.372	-1.24855	0.0091176	Up
ENSG00000273540	AGBL1	protein_coding	1.244	2.369	2.369	-0.606435	0.0038271	Up
ENSG00000249502	AC006160.1	lncRNA	1.244	2.368	2.368	-0.956757	0.0089475	Up
ENSG00000197372	ZNF675	protein_coding	1.244	2.368	2.368	1.86961	2.0665e-06	Up
ENSG00000256577	AC007406.4	lncRNA	1.243	2.367	2.367	-0.669173	0.0021814	Up
ENSG00000273888	FRMD6-AS1	lncRNA	1.243	2.366	2.366	-0.324029	0.0014043	Up
ENSG00000261186	LINC01238	lncRNA	1.242	2.366	2.366	-0.555028	0.00213	Up
ENSG00000163659	TIPARP	protein_coding	1.242	2.365	2.365	5.13219	1.5558e-11	Up
ENSG00000247735	AC120114.1	lncRNA	1.241	2.363	2.363	2.24628	9.3499e-7	Up
ENSG00000182459	TEX19	protein_coding	1.24	2.362	2.362	2.61324	4.2248e-8	Up
ENSG00000118523	CCN2	protein_coding	1.24	2.361	2.361	2.42606	1.2741e-7	Up
ENSG00000272523	LINC01023	lncRNA	1.238	2.359	2.359	1.01147	4.4689e-05	Up
ENSG00000046774	MAGEC2	protein_coding	1.238	2.359	2.359	-0.440236	0.0058462	Up
ENSG00000266921	AC006213.2	lncRNA	1.237	2.358	2.358	-1.36611	0.045423	Up
ENSG00000102144	PGK1	protein_coding	1.236	2.356	2.356	10.5052	1.3336e-11	Up
ENSG00000183186	C2CD4C	protein_coding	1.236	2.356	2.356	1.77175	1.883e-06	Up
ENSG00000227908	AC016596.1	lncRNA	1.232	2.349	2.349	-0.475801	0.0026368	Up
ENSG00000163497	FEV	protein_coding	1.231	2.348	2.348	-0.879526	0.0041141	Up
ENSG00000253764	AC019257.1	lncRNA	1.23	2.346	2.346	0.135091	0.00074851	Up
ENSG00000284738	AL358472.5	lncRNA	1.228	2.342	2.342	-1.43902	0.014319	Up
ENSG00000226386	PARD3-AS1	lncRNA	1.227	2.341	2.341	-0.804779	0.0072255	Up
ENSG00000115738	ID2	protein_coding	1.227	2.341	2.341	8.2112	2.649e-12	Up
ENSG00000245498	AP000866.1	lncRNA	1.226	2.34	2.34	0.308364	0.00029281	Up
ENSG00000245149	RNF139-AS1	lncRNA	1.226	2.339	2.339	2.6968	1.0849e-7	Up
ENSG00000133110	POSTN	protein_coding	1.225	2.338	2.338	-1.17002	0.0059125	Up
ENSG00000104722	NEFM	protein_coding	1.225	2.337	2.337	8.85709	4.7012e-11	Up
ENSG00000203667	COX20	protein_coding	1.225	2.337	2.337	4.30415	1.9408e-10	Up
ENSG00000272606	AC015982.1	lncRNA	1.224	2.336	2.336	0.969705	9.578e-05	Up
ENSG00000213062	AL021068.1	lncRNA	1.223	2.335	2.335	0.394796	0.00010421	Up
ENSG00000243926	TIPARP-AS1	lncRNA	1.223	2.334	2.334	-0.102252	0.0019007	Up
ENSG00000277586	NEFL	protein_coding	1.223	2.334	2.334	7.94158	7.8246e-12	Up
ENSG00000161298	ZNF382	protein_coding	1.223	2.334	2.334	0.44373	0.00011797	Up
ENSG00000164440	TXLNB	protein_coding	1.223	2.334	2.334	-0.0319878	0.00065533	Up
ENSG00000273456	AC064836.3	lncRNA	1.222	2.333	2.333	0.705858	0.00011162	Up
ENSG00000182648	LINC01006	lncRNA	1.222	2.332	2.332	1.72663	3.687e-06	Up
ENSG00000231721	LINC-PINT	lncRNA	1.221	2.331	2.331	2.19882	7.4862e-7	Up
ENSG00000273008	AC010864.1	lncRNA	1.221	2.331	2.331	1.54633	1.7325e-05	Up
ENSG00000036530	CYP46A1	protein_coding	1.221	2.331	2.331	-0.340954	0.0028814	Up
ENSG00000277969	AC006449.6	lncRNA	1.22	2.329	2.329	2.19905	1.9289e-06	Up
ENSG00000241313	WWTR1-AS1	lncRNA	1.219	2.328	2.328	-0.6261	0.0024626	Up
ENSG00000167555	ZNF528	protein_coding	1.218	2.326	2.326	-0.505829	0.0016285	Up
ENSG00000136167	LCP1	protein_coding	1.217	2.325	2.325	1.33285	1.9347e-05	Up
ENSG00000158104	HPD	protein_coding	1.217	2.324	2.324	-0.930255	0.0089791	Up
ENSG00000114023	FAM162A	protein_coding	1.215	2.321	2.321	7.14844	2.4725e-12	Up
ENSG00000270069	MIR222HG	lncRNA	1.214	2.32	2.32	5.45444	6.7231e-8	Up
ENSG00000271614	ATP2B1-AS1	lncRNA	1.213	2.318	2.318	0.783505	5.0479e-05	Up
ENSG00000267905	AC008750.3	lncRNA	1.213	2.318	2.318	-0.866496	0.0055781	Up
ENSG00000205542	TMSB4X	protein_coding	1.212	2.316	2.316	6.1933	1.435e-11	Up
ENSG00000230148	HOXB-AS1	lncRNA	1.211	2.315	2.315	1.30614	1.8036e-05	Up
ENSG00000143199	ADCY10	protein_coding	1.21	2.314	2.314	0.292549	0.00023015	Up
ENSG00000277268	LHX1-DT	lncRNA	1.208	2.309	2.309	1.89045	1.6907e-06	Up
ENSG00000271855	AC073195.1	lncRNA	1.207	2.308	2.308	0.685504	7.5935e-05	Up
ENSG00000274979	AC020656.2	lncRNA	1.207	2.308	2.308	-1.28177	0.019846	Up
ENSG00000260708	AL118516.1	lncRNA	1.206	2.307	2.307	3.88212	7.0949e-10	Up
ENSG00000117115	PADI2	protein_coding	1.206	2.307	2.307	2.84106	9.8365e-8	Up
ENSG00000232850	AL590708.1	lncRNA	1.204	2.304	2.304	-0.701948	0.0034242	Up
ENSG00000274267	HIST1H3B	protein_coding	1.204	2.304	2.304	-0.681342	0.0058046	Up
ENSG00000274678	AC106886.3	lncRNA	1.203	2.302	2.302	-0.647251	0.0032378	Up
ENSG00000107968	MAP3K8	protein_coding	1.202	2.301	2.301	2.35408	3.4491e-7	Up
ENSG00000166183	ASPG	protein_coding	1.198	2.295	2.295	-0.615884	0.0085619	Up
ENSG00000187135	VSTM2B	protein_coding	1.197	2.293	2.293	-0.332103	0.0016728	Up
ENSG00000269814	AC008403.4	lncRNA	1.197	2.292	2.292	-0.86569	0.013798	Up
ENSG00000146221	TCTE1	protein_coding	1.196	2.291	2.291	-0.411879	0.002255	Up
ENSG00000138650	PCDH10	protein_coding	1.194	2.289	2.289	6.62721	1.0707e-11	Up
ENSG00000240065	PSMB9	protein_coding	1.194	2.288	2.288	0.0170646	0.00060695	Up
ENSG00000015479	MATR3	protein_coding	1.193	2.286	2.286	2.65125	2.3266e-7	Up
ENSG00000124159	MATN4	protein_coding	1.193	2.286	2.286	-0.394496	0.0036937	Up
ENSG00000172936	MYD88	protein_coding	1.192	2.284	2.284	-1.02432	0.0072132	Up
ENSG00000267892	AC022144.1	lncRNA	1.19	2.282	2.282	0.559934	0.00038706	Up
ENSG00000167964	RAB26	protein_coding	1.189	2.28	2.28	2.88328	2.8634e-8	Up
ENSG00000112175	BMP5	protein_coding	1.189	2.28	2.28	0.016936	0.00046151	Up
ENSG00000224349	AL365226.1	lncRNA	1.189	2.279	2.279	-0.505163	0.0036549	Up
ENSG00000197837	HIST4H4	protein_coding	1.188	2.279	2.279	-0.420259	0.0034868	Up
ENSG00000196668	LINC00173	lncRNA	1.188	2.278	2.278	3.42273	1.9729e-8	Up
ENSG00000275437	AL121832.3	lncRNA	1.188	2.278	2.278	2.64018	4.5027e-7	Up
ENSG00000273783	AL136040.1	lncRNA	1.188	2.278	2.278	-0.079814	0.00092303	Up
ENSG00000272715	AL157904.1	lncRNA	1.188	2.278	2.278	-0.904135	0.0055053	Up
ENSG00000184557	SOCS3	protein_coding	1.186	2.276	2.276	1.58711	1.3818e-05	Up
ENSG00000261324	AC010168.2	lncRNA	1.186	2.275	2.275	0.646051	6.4507e-05	Up
ENSG00000183397	C19orf71	protein_coding	1.186	2.275	2.275	0.34158	0.00040245	Up
ENSG00000166148	AVPR1A	protein_coding	1.186	2.275	2.275	-0.200667	0.0016344	Up
ENSG00000261033	AC005730.2	lncRNA	1.186	2.274	2.274	1.7027	1.0551e-05	Up
ENSG00000250241	AC105383.1	lncRNA	1.185	2.274	2.274	1.53671	6.5447e-06	Up
ENSG00000247151	CSTF3-DT	lncRNA	1.185	2.273	2.273	-0.525187	0.0030168	Up
ENSG00000232677	LINC00665	lncRNA	1.184	2.272	2.272	1.65494	5.8965e-06	Up
ENSG00000273374	AC069222.1	lncRNA	1.183	2.271	2.271	1.11217	3.8766e-05	Up
ENSG00000126856	PRDM7	protein_coding	1.183	2.271	2.271	-1.15407	0.017468	Up
ENSG00000174514	MFSD4A	protein_coding	1.182	2.27	2.27	1.29704	0.00022638	Up
ENSG00000278811	LINC00624	lncRNA	1.182	2.269	2.269	-0.71473	0.0070814	Up
ENSG00000253508	AC004080.2	lncRNA	1.18	2.266	2.266	0.887176	5.284e-05	Up
ENSG00000272677	AC124016.1	lncRNA	1.18	2.266	2.266	0.879586	6.558e-05	Up
ENSG00000127507	ADGRE2	protein_coding	1.18	2.266	2.266	-0.155058	0.001736	Up
ENSG00000269821	KCNQ1OT1	lncRNA	1.18	2.265	2.265	2.63536	2.6105e-7	Up
ENSG00000223638	RFPL4A	protein_coding	1.18	2.265	2.265	-1.03864	0.0062602	Up
ENSG00000168060	NAALADL1	protein_coding	1.179	2.264	2.264	0.490157	0.00016043	Up
ENSG00000142609	CFAP74	protein_coding	1.179	2.264	2.264	0.0507523	0.00060193	Up
ENSG00000014257	ACPP	protein_coding	1.178	2.263	2.263	1.14471	3.3281e-05	Up
ENSG00000113073	SLC4A9	protein_coding	1.178	2.263	2.263	0.0643108	0.0010057	Up
ENSG00000172361	CFAP53	protein_coding	1.178	2.262	2.262	0.30198	0.0022617	Up
ENSG00000255328	AC136475.5	lncRNA	1.177	2.261	2.261	-1.38468	0.021562	Up
ENSG00000169129	AFAP1L2	protein_coding	1.177	2.26	2.26	2.78583	5.1689e-8	Up
ENSG00000231249	ITPR1-DT	lncRNA	1.175	2.258	2.258	0.471401	0.00055563	Up
ENSG00000285587	AC012470.1	lncRNA	1.173	2.255	2.255	-1.29809	0.011865	Up
ENSG00000259207	ITGB3	protein_coding	1.172	2.254	2.254	-0.348002	0.0060423	Up
ENSG00000198221	AFDN-DT	lncRNA	1.172	2.253	2.253	2.63199	1.1267e-7	Up
ENSG00000272501	AL662844.4	lncRNA	1.172	2.253	2.253	0.624659	0.0001406	Up
ENSG00000267260	AC020928.2	lncRNA	1.169	2.248	2.248	1.30989	1.3197e-05	Up
ENSG00000255100	AP003119.2	lncRNA	1.169	2.248	2.248	0.302356	0.0016053	Up
ENSG00000261737	AL049597.2	lncRNA	1.169	2.248	2.248	-0.257745	0.0033176	Up
ENSG00000277232	GTSE1-DT	lncRNA	1.168	2.247	2.247	0.685954	0.00019386	Up
ENSG00000063438	AHRR	protein_coding	1.168	2.247	2.247	1.60205	2.4886e-05	Up
ENSG00000010671	BTK	protein_coding	1.168	2.247	2.247	0.235698	0.00033316	Up
ENSG00000110944	IL23A	protein_coding	1.168	2.246	2.246	-0.486316	0.0086901	Up
ENSG00000274976	AC087588.2	lncRNA	1.167	2.246	2.246	-1.18556	0.010073	Up
ENSG00000147036	LANCL3	protein_coding	1.167	2.246	2.246	0.754119	0.0001063	Up
ENSG00000109321	AREG	protein_coding	1.167	2.246	2.246	-1.20077	0.026373	Up
ENSG00000237686	AL109615.3	lncRNA	1.167	2.245	2.245	0.85867	0.00016043	Up
ENSG00000227838	AL121885.2	lncRNA	1.166	2.244	2.244	-0.102311	0.0010254	Up
ENSG00000189060	H1F0	protein_coding	1.165	2.243	2.243	9.0319	3.3559e-11	Up
ENSG00000105136	ZNF419	protein_coding	1.165	2.242	2.242	2.09121	3.5923e-06	Up
ENSG00000263080	AC009121.2	lncRNA	1.164	2.241	2.241	1.07622	6.1902e-05	Up
ENSG00000273355	AP000894.4	lncRNA	1.163	2.24	2.24	0.430839	0.00024263	Up
ENSG00000184619	KRBA2	protein_coding	1.163	2.239	2.239	-0.891571	0.0097639	Up
ENSG00000007350	TKTL1	protein_coding	1.162	2.237	2.237	0.587897	0.00050064	Up
ENSG00000269894	AC018809.1	lncRNA	1.16	2.235	2.235	-0.679084	0.0071451	Up
ENSG00000166780	C16orf45	protein_coding	1.16	2.235	2.235	0.913444	0.00027375	Up
ENSG00000181322	NME9	protein_coding	1.16	2.235	2.235	0.0498146	0.0015084	Up
ENSG00000230699	AL645608.2	lncRNA	1.159	2.233	2.233	1.95849	1.5384e-06	Up
ENSG00000106069	CHN2	protein_coding	1.157	2.23	2.23	-0.997034	0.0091192	Up
ENSG00000155495	MAGEC1	protein_coding	1.156	2.229	2.229	0.268176	0.00053919	Up
ENSG00000167779	IGFBP6	protein_coding	1.156	2.228	2.228	0.101604	0.00044181	Up
ENSG00000268471	MIR4453HG	lncRNA	1.155	2.227	2.227	3.89465	6.1565e-8	Up
ENSG00000227698	AP001619.1	lncRNA	1.155	2.227	2.227	-0.658052	0.012838	Up
ENSG00000181218	HIST3H2A	protein_coding	1.155	2.227	2.227	4.93126	2.8545e-8	Up
ENSG00000267750	RUNDC3A-AS1	lncRNA	1.154	2.226	2.226	1.91208	2.3898e-06	Up
ENSG00000229956	ZRANB2-AS2	lncRNA	1.154	2.226	2.226	0.246826	0.0013528	Up
ENSG00000102924	CBLN1	protein_coding	1.154	2.226	2.226	0.495709	0.00031287	Up
ENSG00000277214	AC009159.2	lncRNA	1.154	2.225	2.225	-0.117218	0.0013044	Up
ENSG00000170214	ADRA1B	protein_coding	1.154	2.225	2.225	0.31297	0.0003532	Up
ENSG00000260000	AL133338.1	lncRNA	1.153	2.223	2.223	2.20629	2.3634e-06	Up
ENSG00000251364	AC107884.1	lncRNA	1.15	2.219	2.219	0.473855	0.00056884	Up
ENSG00000169306	IL1RAPL1	protein_coding	1.15	2.219	2.219	-0.713437	0.0046066	Up
ENSG00000169181	GSG1L	protein_coding	1.15	2.219	2.219	-0.724918	0.0051806	Up
ENSG00000177932	ZNF354C	protein_coding	1.149	2.218	2.218	-0.564469	0.0046358	Up
ENSG00000226530	AL158055.1	lncRNA	1.147	2.215	2.215	1.94768	5.9967e-06	Up
ENSG00000245213	AC105285.1	lncRNA	1.147	2.215	2.215	-0.280251	0.0087473	Up
ENSG00000115414	FN1	protein_coding	1.147	2.214	2.214	7.01246	4.1954e-11	Up
ENSG00000278600	AC015871.3	lncRNA	1.146	2.213	2.213	2.73197	5.363e-06	Up
ENSG00000237940	LINC01238	lncRNA	1.145	2.212	2.212	0.693657	0.00012701	Up
ENSG00000160097	FNDC5	protein_coding	1.145	2.212	2.212	0.657843	0.0001271	Up
ENSG00000271966	AC021321.1	lncRNA	1.145	2.211	2.211	-0.0438565	0.0014882	Up
ENSG00000260588	AC027702.1	lncRNA	1.145	2.211	2.211	-0.575105	0.0063353	Up
ENSG00000175197	DDIT3	protein_coding	1.144	2.211	2.211	4.08948	4.7689e-9	Up
ENSG00000106034	CPED1	protein_coding	1.142	2.208	2.208	0.175837	0.0006859	Up
ENSG00000229267	AC016708.1	lncRNA	1.142	2.207	2.207	-1.38458	0.024207	Up
ENSG00000269392	AC008655.2	lncRNA	1.142	2.207	2.207	-1.12392	0.026281	Up
ENSG00000162344	FGF19	protein_coding	1.142	2.207	2.207	-0.125766	0.0029884	Up
ENSG00000273274	ZBTB8B	protein_coding	1.141	2.206	2.206	3.39134	6.8587e-8	Up
ENSG00000100218	RSPH14	protein_coding	1.141	2.205	2.205	0.592198	0.00012521	Up
ENSG00000088882	CPXM1	protein_coding	1.141	2.205	2.205	-1.63744	0.021245	Up
ENSG00000271888	AL136162.1	lncRNA	1.14	2.204	2.204	1.38076	1.7182e-05	Up
ENSG00000259804	AC027682.1	lncRNA	1.14	2.204	2.204	-0.865386	0.014857	Up
ENSG00000102678	FGF9	protein_coding	1.14	2.203	2.203	2.67246	2.7909e-7	Up
ENSG00000233901	LINC01503	lncRNA	1.139	2.203	2.203	-1.26492	0.014347	Up
ENSG00000255153	TOLLIP-AS1	lncRNA	1.138	2.201	2.201	2.10797	1.5036e-06	Up
ENSG00000282851	BISPR	lncRNA	1.138	2.201	2.201	-0.265183	0.0051104	Up
ENSG00000188064	WNT7B	protein_coding	1.138	2.201	2.201	0.30395	0.00088639	Up
ENSG00000203952	CCDC160	protein_coding	1.138	2.2	2.2	0.484268	0.00017065	Up
ENSG00000253931	AC105118.1	lncRNA	1.137	2.199	2.199	0.0764071	0.0019939	Up
ENSG00000203808	BVES-AS1	lncRNA	1.136	2.198	2.198	0.537457	0.00025125	Up
ENSG00000173210	ABLIM3	protein_coding	1.136	2.198	2.198	1.90743	1.5298e-06	Up
ENSG00000253404	AC034243.1	lncRNA	1.135	2.197	2.197	-1.24883	0.015571	Up
ENSG00000267436	AC005786.3	lncRNA	1.134	2.195	2.195	-0.125144	0.0026186	Up
ENSG00000266236	NARF-IT1	lncRNA	1.134	2.195	2.195	-0.793158	0.016044	Up
ENSG00000156509	FBXO43	protein_coding	1.134	2.195	2.195	-0.701451	0.0089355	Up
ENSG00000073146	MOV10L1	protein_coding	1.133	2.194	2.194	-1.31573	0.019243	Up
ENSG00000245146	MALINC1	lncRNA	1.133	2.193	2.193	1.30933	1.1915e-05	Up
ENSG00000237742	AL365259.1	lncRNA	1.133	2.193	2.193	0.0232018	0.0014927	Up
ENSG00000263753	LINC00667	lncRNA	1.132	2.191	2.191	-1.17038	0.010172	Up
ENSG00000258938	AL162311.3	lncRNA	1.132	2.191	2.191	-0.96969	0.010469	Up
ENSG00000269399	AC008764.6	lncRNA	1.13	2.189	2.189	1.70513	3.8223e-05	Up
ENSG00000227256	MIS18A-AS1	lncRNA	1.128	2.186	2.186	0.0709613	0.0015721	Up
ENSG00000106258	CYP3A5	protein_coding	1.127	2.184	2.184	1.19415	2.5452e-05	Up
ENSG00000177453	NIM1K	protein_coding	1.127	2.183	2.183	1.75142	6.9752e-06	Up
ENSG00000165591	FAAH2	protein_coding	1.126	2.183	2.183	-0.854909	0.011439	Up
ENSG00000231728	TMSB15B-AS1	lncRNA	1.126	2.182	2.182	0.611007	0.00066466	Up
ENSG00000261485	PAN3-AS1	lncRNA	1.125	2.181	2.181	0.812477	0.0001895	Up
ENSG00000225913	AL138767.3	lncRNA	1.125	2.181	2.181	0.181821	0.0058046	Up
ENSG00000121101	TEX14	protein_coding	1.124	2.179	2.179	2.0331	1.2734e-06	Up
ENSG00000175265	GOLGA8A	protein_coding	1.123	2.178	2.178	6.37389	1.8702e-9	Up
ENSG00000160678	S100A1	protein_coding	1.122	2.177	2.177	-0.411878	0.0053811	Up
ENSG00000266010	GATA6-AS1	lncRNA	1.122	2.176	2.176	2.19656	1.5966e-06	Up
ENSG00000277511	AC116407.2	lncRNA	1.122	2.176	2.176	-0.681091	0.0057743	Up
ENSG00000274828	AC068473.5	lncRNA	1.121	2.175	2.175	1.50201	1.0309e-05	Up
ENSG00000196218	RYR1	protein_coding	1.121	2.175	2.175	1.10727	7.5784e-05	Up
ENSG00000274422	AC245060.5	lncRNA	1.12	2.173	2.173	2.93707	2.132e-06	Up
ENSG00000268403	AC132192.2	lncRNA	1.119	2.172	2.172	2.19299	1.9817e-06	Up
ENSG00000089775	ZBTB25	protein_coding	1.118	2.171	2.171	5.2005	4.3699e-11	Up
ENSG00000130812	ANGPTL6	protein_coding	1.116	2.168	2.168	0.0161519	0.00087842	Up
ENSG00000111799	COL12A1	protein_coding	1.116	2.167	2.167	0.585641	0.00042313	Up
ENSG00000235023	AP001626.1	lncRNA	1.115	2.165	2.165	0.906315	0.00019394	Up
ENSG00000227954	TARID	lncRNA	1.114	2.165	2.165	-0.0943518	0.0017274	Up
ENSG00000263280	AC003965.1	lncRNA	1.113	2.164	2.164	0.818278	9.8591e-05	Up
ENSG00000225205	AC078883.1	lncRNA	1.113	2.164	2.164	0.134008	0.0012618	Up
ENSG00000224934	AL391684.1	lncRNA	1.113	2.163	2.163	3.67482	1.8055e-7	Up
ENSG00000250159	AC106791.1	lncRNA	1.112	2.162	2.162	1.24681	2.2418e-05	Up
ENSG00000007516	BAIAP3	protein_coding	1.111	2.16	2.16	2.17544	1.9549e-06	Up
ENSG00000117394	SLC2A1	protein_coding	1.111	2.159	2.159	7.00428	4.7434e-10	Up
ENSG00000259494	MRPL46	protein_coding	1.11	2.159	2.159	2.4138	1.4764e-06	Up
ENSG00000118804	STBD1	protein_coding	1.109	2.157	2.157	-0.0657323	0.0013117	Up
ENSG00000222020	HDAC4-AS1	lncRNA	1.108	2.156	2.156	0.894941	8.2531e-05	Up
ENSG00000117281	CD160	protein_coding	1.108	2.156	2.156	-0.853854	0.0081437	Up
ENSG00000251611	FAM160A1-DT	lncRNA	1.108	2.155	2.155	-0.447937	0.0053279	Up
ENSG00000102057	KCND1	protein_coding	1.107	2.154	2.154	1.66228	8.7601e-06	Up
ENSG00000132141	CCT6B	protein_coding	1.107	2.154	2.154	0.685585	0.00036525	Up
ENSG00000149654	CDH22	protein_coding	1.107	2.154	2.154	-1.02352	0.014138	Up
ENSG00000197776	KLHDC1	protein_coding	1.106	2.153	2.153	-0.91703	0.010617	Up
ENSG00000138166	DUSP5	protein_coding	1.106	2.152	2.152	3.09607	5.8081e-8	Up
ENSG00000135636	DYSF	protein_coding	1.106	2.152	2.152	0.439759	0.00040607	Up
ENSG00000228775	WEE2-AS1	lncRNA	1.105	2.151	2.151	1.08237	6.6668e-05	Up
ENSG00000196542	SPTSSB	protein_coding	1.105	2.151	2.151	0.0822026	0.0008478	Up
ENSG00000164484	TMEM200A	protein_coding	1.105	2.15	2.15	-0.878909	0.0090991	Up
ENSG00000229931	AL137003.1	lncRNA	1.104	2.15	2.15	0.980922	9.3798e-05	Up
ENSG00000159450	TCHH	protein_coding	1.104	2.149	2.149	-0.394336	0.00587	Up
ENSG00000223745	CCDC18-AS1	lncRNA	1.103	2.148	2.148	4.95955	2.2731e-10	Up
ENSG00000273066	AL355987.4	lncRNA	1.103	2.148	2.148	2.25712	4.0303e-06	Up
ENSG00000248690	HAS2-AS1	lncRNA	1.103	2.148	2.148	-1.21663	0.033319	Up
ENSG00000246308	AC116535.1	lncRNA	1.102	2.147	2.147	-1.28147	0.03524	Up
ENSG00000187398	LUZP2	protein_coding	1.101	2.145	2.145	-1.20063	0.021626	Up
ENSG00000231160	KLF3-AS1	lncRNA	1.101	2.144	2.144	-1.02362	0.036302	Up
ENSG00000271576	AL359504.2	lncRNA	1.1	2.144	2.144	4.81525	9.09e-9	Up
ENSG00000134376	CRB1	protein_coding	1.1	2.144	2.144	-1.08081	0.032288	Up
ENSG00000176406	RIMS2	protein_coding	1.1	2.143	2.143	0.897606	0.00010698	Up
ENSG00000270933	AC010719.1	lncRNA	1.099	2.141	2.141	1.65543	1.7309e-05	Up
ENSG00000228140	AL031283.1	lncRNA	1.098	2.141	2.141	-0.231376	0.0061008	Up
ENSG00000272525	AC099522.2	lncRNA	1.098	2.14	2.14	1.4141	2.4683e-05	Up
ENSG00000159399	HK2	protein_coding	1.098	2.14	2.14	7.66051	1.5558e-11	Up
ENSG00000183111	ARHGEF37	protein_coding	1.098	2.14	2.14	1.91701	3.9658e-06	Up
ENSG00000139219	COL2A1	protein_coding	1.097	2.14	2.14	-1.14065	0.018899	Up
ENSG00000270052	BX546450.2	lncRNA	1.097	2.138	2.138	0.29275	0.00056298	Up
ENSG00000250208	FZD10-AS1	lncRNA	1.096	2.138	2.138	2.64488	7.5914e-7	Up
ENSG00000213057	C1orf220	lncRNA	1.095	2.136	2.136	-0.0165903	0.0013536	Up
ENSG00000223774	AL513217.1	lncRNA	1.095	2.136	2.136	-0.905279	0.017337	Up
ENSG00000099260	PALMD	protein_coding	1.095	2.136	2.136	0.0689495	0.00052106	Up
ENSG00000196741	LINC01560	lncRNA	1.095	2.135	2.135	2.12946	3.9604e-06	Up
ENSG00000251022	THAP9-AS1	lncRNA	1.094	2.135	2.135	7.03812	2.0597e-10	Up
ENSG00000161960	EIF4A1	protein_coding	1.094	2.134	2.134	3.02204	9.5586e-8	Up
ENSG00000247950	SEC24B-AS1	lncRNA	1.093	2.134	2.134	0.175407	0.0040657	Up
ENSG00000230658	KLHL7-DT	lncRNA	1.093	2.133	2.133	1.02117	0.00014412	Up
ENSG00000158427	TMSB15B	protein_coding	1.093	2.133	2.133	1.03625	0.00011409	Up
ENSG00000279342	AP000866.6	lncRNA	1.092	2.132	2.132	1.10053	0.00023106	Up
ENSG00000110076	NRXN2	protein_coding	1.092	2.132	2.132	2.71202	2.0406e-7	Up
ENSG00000138316	ADAMTS14	protein_coding	1.092	2.132	2.132	0.302715	0.00062663	Up
ENSG00000006283	CACNA1G	protein_coding	1.091	2.13	2.13	2.49529	5.1365e-06	Up
ENSG00000245522	AC026250.1	lncRNA	1.089	2.127	2.127	0.382202	0.0013065	Up
ENSG00000286180	AC073140.2	lncRNA	1.089	2.127	2.127	0.0162543	0.007025	Up
ENSG00000237452	BHMG1	protein_coding	1.089	2.127	2.127	-0.0113609	0.0011057	Up
ENSG00000260329	AC007541.1	lncRNA	1.088	2.126	2.126	3.27239	8.0115e-8	Up
ENSG00000123407	HOXC12	protein_coding	1.088	2.126	2.126	0.0093407	0.0013247	Up
ENSG00000272438	AL645608.6	lncRNA	1.088	2.125	2.125	0.17064	0.00077988	Up
ENSG00000196110	ZNF699	protein_coding	1.088	2.125	2.125	1.37079	4.032e-05	Up
ENSG00000285219	AL591485.1	lncRNA	1.087	2.125	2.125	1.49715	1.4471e-05	Up
ENSG00000225446	LINC01763	lncRNA	1.087	2.125	2.125	-0.486585	0.0049333	Up
ENSG00000269038	AP001462.1	lncRNA	1.087	2.124	2.124	-0.6159	0.0053517	Up
ENSG00000075461	CACNG4	protein_coding	1.087	2.124	2.124	1.65921	8.17e-06	Up
ENSG00000206384	COL6A6	protein_coding	1.087	2.124	2.124	-0.658553	0.011085	Up
ENSG00000224842	AL161908.1	lncRNA	1.085	2.121	2.121	0.164339	0.00067836	Up
ENSG00000259030	FPGT-TNNI3K	protein_coding	1.085	2.121	2.121	1.46123	4.0613e-05	Up
ENSG00000125629	INSIG2	protein_coding	1.084	2.119	2.119	5.39528	1.1848e-9	Up
ENSG00000269978	AL359881.1	lncRNA	1.083	2.119	2.119	-0.544054	0.0065853	Up
ENSG00000206344	HCG27	lncRNA	1.082	2.117	2.117	0.583403	0.00017385	Up
ENSG00000184047	DIABLO	protein_coding	1.082	2.117	2.117	1.29829	7.4483e-05	Up
ENSG00000276649	AL117335.1	lncRNA	1.082	2.116	2.116	-0.486396	0.0053053	Up
ENSG00000231305	AC112484.1	lncRNA	1.081	2.116	2.116	-0.148472	0.0053753	Up
ENSG00000272459	AC139795.3	lncRNA	1.081	2.116	2.116	-0.747567	0.0079399	Up
ENSG00000101665	SMAD7	protein_coding	1.081	2.116	2.116	4.2588	2.7708e-9	Up
ENSG00000177519	RPRM	protein_coding	1.081	2.116	2.116	1.2085	5.2491e-05	Up
ENSG00000153404	PLEKHG4B	protein_coding	1.081	2.116	2.116	0.0166305	0.00091358	Up
ENSG00000158290	CUL4B	protein_coding	1.081	2.115	2.115	9.0373	2.1165e-10	Up
ENSG00000283078	AL137077.2	lncRNA	1.08	2.115	2.115	0.720402	0.0004475	Up
ENSG00000272347	AC116351.2	lncRNA	1.08	2.115	2.115	-0.605974	0.0095644	Up
ENSG00000261123	AC009065.5	lncRNA	1.08	2.114	2.114	-0.625976	0.0089724	Up
ENSG00000224292	AF196972.1	lncRNA	1.079	2.112	2.112	-0.574929	0.0063353	Up
ENSG00000267213	AC007773.1	lncRNA	1.077	2.109	2.109	0.606278	0.00064334	Up
ENSG00000284954	AL662884.3	lncRNA	1.076	2.109	2.109	-0.279939	0.006925	Up
ENSG00000226913	BSN-DT	lncRNA	1.076	2.109	2.109	-0.534574	0.011106	Up
ENSG00000264107	AC138207.2	lncRNA	1.076	2.108	2.108	-0.0731939	0.0021007	Up
ENSG00000273391	AC083880.1	lncRNA	1.075	2.107	2.107	0.885494	0.00022164	Up
ENSG00000273247	AC097376.2	lncRNA	1.074	2.106	2.106	1.54947	5.9029e-05	Up
ENSG00000130433	CACNG6	protein_coding	1.074	2.106	2.106	0.037185	0.0016503	Up
ENSG00000273828	AL133227.1	lncRNA	1.074	2.105	2.105	-1.09498	0.018651	Up
ENSG00000150672	DLG2	protein_coding	1.073	2.104	2.104	0.697396	0.00041649	Up
ENSG00000228288	PCAT6	lncRNA	1.07	2.1	2.1	2.32204	1.4155e-06	Up
ENSG00000254855	AP001107.8	lncRNA	1.07	2.1	2.1	-0.829348	0.031095	Up
ENSG00000275263	AC135048.3	lncRNA	1.07	2.1	2.1	-1.09535	0.041944	Up
ENSG00000102230	PCYT1B	protein_coding	1.07	2.1	2.1	1.9653	5.5595e-06	Up
ENSG00000026508	CD44	protein_coding	1.069	2.098	2.098	0.480018	0.00043711	Up
ENSG00000005844	ITGAL	protein_coding	1.069	2.098	2.098	-0.0745263	0.0070368	Up
ENSG00000231920	NEBL-AS1	lncRNA	1.068	2.096	2.096	-1.38464	0.026258	Up
ENSG00000187583	PLEKHN1	protein_coding	1.068	2.096	2.096	-1.29849	0.019651	Up
ENSG00000267121	AC008105.3	lncRNA	1.067	2.095	2.095	1.31455	3.9773e-05	Up
ENSG00000280739	EIF1B-AS1	lncRNA	1.067	2.095	2.095	0.807631	0.00039237	Up
ENSG00000140450	ARRDC4	protein_coding	1.067	2.095	2.095	6.44198	2.6131e-10	Up
ENSG00000205334	LINC01460	lncRNA	1.066	2.093	2.093	-1.09567	0.029414	Up
ENSG00000139625	MAP3K12	protein_coding	1.066	2.093	2.093	3.01608	2.4497e-7	Up
ENSG00000112539	C6orf118	protein_coding	1.064	2.091	2.091	-1.15485	0.030508	Up
ENSG00000121413	ZSCAN18	protein_coding	1.063	2.09	2.09	3.69326	8.0077e-9	Up
ENSG00000112379	ARFGEF3	protein_coding	1.063	2.089	2.089	4.41139	6.0146e-10	Up
ENSG00000198003	CCDC151	protein_coding	1.063	2.089	2.089	2.79936	9.4077e-7	Up
ENSG00000164136	IL15	protein_coding	1.063	2.089	2.089	0.210503	0.0019681	Up
ENSG00000249650	AC106772.1	lncRNA	1.062	2.089	2.089	-1.24883	0.030208	Up
ENSG00000005243	COPZ2	protein_coding	1.062	2.087	2.087	-0.81856	0.044095	Up
ENSG00000278434	AC023830.3	lncRNA	1.061	2.087	2.087	-0.200341	0.0078719	Up
ENSG00000248787	AC092903.2	lncRNA	1.061	2.086	2.086	-0.723907	0.012309	Up
ENSG00000090534	THPO	protein_coding	1.06	2.085	2.085	-0.574305	0.009386	Up
ENSG00000261094	AC007066.2	lncRNA	1.06	2.084	2.084	2.13816	1.9722e-05	Up
ENSG00000204390	HSPA1L	protein_coding	1.06	2.084	2.084	-1.33222	0.028792	Up
ENSG00000261120	AL133299.1	lncRNA	1.059	2.083	2.083	0.440222	0.00041681	Up
ENSG00000173486	FKBP2	protein_coding	1.059	2.083	2.083	-0.272459	0.004445	Up
ENSG00000221944	TIGD1	protein_coding	1.057	2.081	2.081	4.90012	2.0443e-9	Up
ENSG00000073756	PTGS2	protein_coding	1.057	2.081	2.081	0.485005	0.00042313	Up
ENSG00000256591	AP003108.2	protein_coding	1.057	2.08	2.08	-0.48582	0.0085813	Up
ENSG00000185215	TNFAIP2	protein_coding	1.054	2.076	2.076	0.624937	0.00053098	Up
ENSG00000246339	EXTL3-AS1	lncRNA	1.052	2.074	2.074	1.07352	8.2722e-05	Up
ENSG00000112183	RBM24	protein_coding	1.052	2.074	2.074	0.114587	0.0017137	Up
ENSG00000261526	AC012615.1	lncRNA	1.051	2.072	2.072	3.84211	2.8685e-7	Up
ENSG00000264456	AC138207.4	lncRNA	1.05	2.071	2.071	1.47737	3.3222e-05	Up
ENSG00000273148	LINC00653	lncRNA	1.049	2.069	2.069	1.82361	6.1289e-06	Up
ENSG00000285693	AP002381.2	lncRNA	1.049	2.069	2.069	1.28336	9.5475e-05	Up
ENSG00000124766	SOX4	protein_coding	1.049	2.069	2.069	7.87845	3.3794e-10	Up
ENSG00000071282	LMCD1	protein_coding	1.049	2.069	2.069	2.37108	1.0851e-06	Up
ENSG00000157103	SLC6A1	protein_coding	1.048	2.068	2.068	1.74934	7.0493e-06	Up
ENSG00000242265	PEG10	protein_coding	1.048	2.068	2.068	-0.969105	0.029188	Up
ENSG00000182809	CRIP2	protein_coding	1.047	2.067	2.067	2.6173	5.8629e-7	Up
ENSG00000229191	AL358473.1	lncRNA	1.046	2.064	2.064	1.24994	0.00029142	Up
ENSG00000273102	AP000569.1	lncRNA	1.046	2.064	2.064	-0.616658	0.0077662	Up
ENSG00000213654	GPSM3	protein_coding	1.044	2.062	2.062	0.465361	0.0017794	Up
ENSG00000230910	AL391807.1	lncRNA	1.043	2.06	2.06	2.00502	1.4577e-05	Up
ENSG00000135439	AGAP2	protein_coding	1.043	2.06	2.06	3.27889	6.4289e-8	Up
ENSG00000172602	RND1	protein_coding	1.042	2.059	2.059	1.48014	2.115e-05	Up
ENSG00000105251	SHD	protein_coding	1.042	2.059	2.059	0.383659	0.00060253	Up
ENSG00000105696	TMEM59L	protein_coding	1.041	2.058	2.058	3.77645	1.4426e-8	Up
ENSG00000179528	LBX2	protein_coding	1.041	2.058	2.058	-0.07341	0.0026785	Up
ENSG00000156535	CD109	protein_coding	1.041	2.058	2.058	0.183541	0.0047221	Up
ENSG00000233527	ZNF529-AS1	lncRNA	1.04	2.056	2.056	0.814242	0.00051591	Up
ENSG00000185499	MUC1	protein_coding	1.04	2.056	2.056	1.17659	6.7853e-05	Up
ENSG00000099957	P2RX6	protein_coding	1.04	2.056	2.056	-0.892517	0.030595	Up
ENSG00000224046	AC005076.1	lncRNA	1.039	2.055	2.055	1.51303	4.0099e-05	Up
ENSG00000260589	STAM-AS1	lncRNA	1.039	2.055	2.055	1.49419	8.0827e-05	Up
ENSG00000103034	NDRG4	protein_coding	1.039	2.055	2.055	4.41001	1.0555e-9	Up
ENSG00000169896	ITGAM	protein_coding	1.039	2.055	2.055	-1.26628	0.031363	Up
ENSG00000153714	LURAP1L	protein_coding	1.037	2.051	2.051	1.6649	2.0492e-05	Up
ENSG00000091536	MYO15A	protein_coding	1.036	2.051	2.051	1.14556	6.5635e-05	Up
ENSG00000133636	NTS	protein_coding	1.036	2.051	2.051	0.6968	0.0001922	Up
ENSG00000259877	AC009113.1	lncRNA	1.036	2.05	2.05	2.80058	1.0292e-06	Up
ENSG00000260273	AL359711.2	lncRNA	1.035	2.05	2.05	-1.08087	0.031323	Up
ENSG00000105675	ATP4A	protein_coding	1.035	2.049	2.049	-0.124152	0.0026207	Up
ENSG00000188859	FAM78B	protein_coding	1.035	2.049	2.049	-1.15467	0.020411	Up
ENSG00000087074	PPP1R15A	protein_coding	1.034	2.048	2.048	6.41224	4.2626e-11	Up
ENSG00000259424	IRAIN	lncRNA	1.033	2.047	2.047	0.195434	0.0015346	Up
ENSG00000232611	AL683813.1	lncRNA	1.033	2.046	2.046	3.06762	1.8311e-7	Up
ENSG00000270164	LINC01480	lncRNA	1.033	2.046	2.046	-0.394711	0.0044903	Up
ENSG00000128340	RAC2	protein_coding	1.032	2.045	2.045	0.497675	0.00053198	Up
ENSG00000264808	AC068025.1	lncRNA	1.031	2.044	2.044	0.731245	0.00026379	Up
ENSG00000167178	ISLR2	protein_coding	1.031	2.044	2.044	-1.385	0.024639	Up
ENSG00000113369	ARRDC3	protein_coding	1.029	2.041	2.041	4.5062	2.6238e-9	Up
ENSG00000232732	AC097717.1	lncRNA	1.028	2.04	2.04	-0.781396	0.014734	Up
ENSG00000272092	AC087623.2	lncRNA	1.027	2.038	2.038	-0.737419	0.021081	Up
ENSG00000132688	NES	protein_coding	1.027	2.038	2.038	3.5254	3.5108e-8	Up
ENSG00000158164	TMSB15A	protein_coding	1.027	2.038	2.038	2.66808	5.2236e-7	Up
ENSG00000187601	MAGEH1	protein_coding	1.026	2.037	2.037	-0.574559	0.0065102	Up
ENSG00000148057	IDNK	protein_coding	1.026	2.037	2.037	-0.930161	0.011613	Up
ENSG00000261341	AC010325.1	protein_coding	1.026	2.036	2.036	-1.38493	0.039094	Up
ENSG00000041353	RAB27B	protein_coding	1.024	2.034	2.034	0.631596	0.00081699	Up
ENSG00000161992	PRR35	protein_coding	1.024	2.034	2.034	0.210732	0.0012098	Up
ENSG00000261211	AL031123.2	lncRNA	1.024	2.033	2.033	0.744095	0.00030832	Up
ENSG00000249572	AC034231.1	lncRNA	1.024	2.033	2.033	-0.669517	0.015592	Up
ENSG00000204584	FLJ45513	lncRNA	1.023	2.033	2.033	-0.758871	0.014904	Up
ENSG00000105649	RAB3A	protein_coding	1.023	2.033	2.033	4.06504	5.9199e-8	Up
ENSG00000251369	ZNF550	protein_coding	1.023	2.033	2.033	2.92398	7.6291e-7	Up
ENSG00000231050	AL109917.1	lncRNA	1.023	2.032	2.032	0.465661	0.00058723	Up
ENSG00000267414	AC120049.1	lncRNA	1.022	2.031	2.031	-0.865821	0.021621	Up
ENSG00000272942	AL022324.3	lncRNA	1.021	2.029	2.029	1.91354	9.9675e-06	Up
ENSG00000160201	U2AF1	protein_coding	1.02	2.028	2.028	1.82824	0.00010343	Up
ENSG00000158373	HIST1H2BD	protein_coding	1.02	2.027	2.027	2.20953	6.1373e-06	Up
ENSG00000198453	ZNF568	protein_coding	1.019	2.027	2.027	1.76217	8.6297e-05	Up
ENSG00000272106	AL691432.2	lncRNA	1.018	2.026	2.026	2.7004	5.3703e-7	Up
ENSG00000265817	FSBP	protein_coding	1.018	2.025	2.025	3.28001	6.4741e-7	Up
ENSG00000226200	SGMS1-AS1	lncRNA	1.017	2.023	2.023	0.543426	0.0006308	Up
ENSG00000115548	KDM3A	protein_coding	1.016	2.023	2.023	6.88885	5.3563e-11	Up
ENSG00000259802	AC012640.2	lncRNA	1.015	2.021	2.021	0.514332	0.00056124	Up
ENSG00000226174	TEX22	protein_coding	1.015	2.021	2.021	1.44758	0.00015152	Up
ENSG00000118307	CASC1	protein_coding	1.014	2.02	2.02	0.0618348	0.0022459	Up
ENSG00000274270	AL137060.1	lncRNA	1.014	2.019	2.019	-0.340434	0.0091965	Up
ENSG00000277200	AC005696.4	lncRNA	1.013	2.018	2.018	0.383845	0.00052697	Up
ENSG00000023608	SNAPC1	protein_coding	1.013	2.018	2.018	4.48974	1.4508e-9	Up
ENSG00000135314	KHDC1	protein_coding	1.012	2.017	2.017	-0.0949223	0.0049594	Up
ENSG00000172638	EFEMP2	protein_coding	1.011	2.016	2.016	2.64522	1.4208e-06	Up
ENSG00000266983	AC011444.1	lncRNA	1.01	2.014	2.014	0.99697	0.00018943	Up
ENSG00000147041	SYTL5	protein_coding	1.01	2.014	2.014	4.80588	1.0448e-9	Up
ENSG00000173227	SYT12	protein_coding	1.01	2.014	2.014	0.964605	0.00023333	Up
ENSG00000247373	AC055713.1	lncRNA	1.009	2.013	2.013	2.89768	4.4202e-06	Up
ENSG00000186732	MPPED1	protein_coding	1.009	2.013	2.013	0.899637	0.00031103	Up
ENSG00000272288	AL451165.2	lncRNA	1.009	2.012	2.012	1.37993	5.4906e-05	Up
ENSG00000140009	ESR2	protein_coding	1.009	2.012	2.012	-0.467198	0.011745	Up
ENSG00000286219	AC242843.1	protein_coding	1.008	2.012	2.012	-0.0298761	0.0061346	Up
ENSG00000272468	AL021807.1	lncRNA	1.008	2.011	2.011	-0.384401	0.0050417	Up
ENSG00000145198	VWA5B2	protein_coding	1.008	2.011	2.011	0.786203	0.0004922	Up
ENSG00000163116	STPG2	protein_coding	1.007	2.01	2.01	-0.394213	0.010393	Up
ENSG00000231999	LRRC8C-DT	lncRNA	1.006	2.009	2.009	0.80622	0.00039673	Up
ENSG00000073584	SMARCE1	protein_coding	1.006	2.008	2.008	3.04691	1.9435e-7	Up
ENSG00000116032	GRIN3B	protein_coding	1.006	2.008	2.008	0.0438297	0.004323	Up
ENSG00000184716	SERINC4	protein_coding	1.005	2.007	2.007	-0.565473	0.0096357	Up
ENSG00000213462	ERV3-1	protein_coding	1.004	2.005	2.005	2.26756	1.3463e-05	Up
ENSG00000042781	USH2A	protein_coding	1.003	2.004	2.004	-0.930448	0.017067	Up
ENSG00000163516	ANKZF1	protein_coding	1.002	2.003	2.003	6.08381	8.9882e-11	Up
ENSG00000280734	LINC01232	lncRNA	1.002	2.002	2.002	0.867793	0.00019963	Up
ENSG00000248309	MEF2C-AS1	lncRNA	1	2	2	0.816614	0.00080377	Up
ENSG00000177058	SLC38A9	protein_coding	-1.006	2.008	2.008	4.65852	1.8282e-8	Down
ENSG00000092295	TGM1	protein_coding	-1.007	2.009	2.009	0.489225	0.0016037	Down
ENSG00000186710	CFAP73	protein_coding	-1.007	2.009	2.009	0.258345	0.0025659	Down
ENSG00000120800	UTP20	protein_coding	-1.009	2.013	2.013	5.55086	3.0125e-10	Down
ENSG00000102109	PCSK1N	protein_coding	-1.009	2.013	2.013	5.06885	1.095e-06	Down
ENSG00000103257	SLC7A5	protein_coding	-1.012	2.017	2.017	7.93481	2.8862e-10	Down
ENSG00000079459	FDFT1	protein_coding	-1.017	2.023	2.023	7.44415	6.7516e-11	Down
ENSG00000179431	FJX1	protein_coding	-1.022	2.03	2.03	4.1995	6.187e-9	Down
ENSG00000232729	AC211433.1	lncRNA	-1.023	2.032	2.032	-0.534207	0.020712	Down
ENSG00000174276	ZNHIT2	protein_coding	-1.025	2.036	2.036	3.09823	5.428e-7	Down
ENSG00000181027	FKRP	protein_coding	-1.03	2.042	2.042	3.99829	9.3069e-9	Down
ENSG00000101084	RAB5IF	protein_coding	-1.03	2.042	2.042	2.74322	2.3423e-05	Down
ENSG00000182810	DDX28	protein_coding	-1.031	2.043	2.043	3.98195	1.4128e-8	Down
ENSG00000114395	CYB561D2	protein_coding	-1.033	2.046	2.046	3.18437	2.3671e-06	Down
ENSG00000198865	CCDC152	protein_coding	-1.039	2.055	2.055	0.134249	0.017878	Down
ENSG00000212907	MT-ND4L	protein_coding	-1.042	2.059	2.059	8.82604	5.146e-7	Down
ENSG00000204569	PPP1R10	protein_coding	-1.043	2.061	2.061	5.35892	4.8958e-9	Down
ENSG00000188763	FZD9	protein_coding	-1.043	2.061	2.061	2.74754	5.5162e-7	Down
ENSG00000183208	GDPGP1	protein_coding	-1.044	2.063	2.063	0.692506	0.001269	Down
ENSG00000172339	ALG14	protein_coding	-1.048	2.068	2.068	4.07453	6.4633e-8	Down
ENSG00000198888	MT-ND1	protein_coding	-1.055	2.077	2.077	9.5796	1.4371e-06	Down
ENSG00000142686	C1orf216	protein_coding	-1.056	2.08	2.08	3.76794	1.0397e-7	Down
ENSG00000176022	B3GALT6	protein_coding	-1.058	2.082	2.082	4.33847	1.0812e-8	Down
ENSG00000198804	MT-CO1	protein_coding	-1.063	2.089	2.089	12.9746	4.1813e-7	Down
ENSG00000103227	LMF1	protein_coding	-1.065	2.092	2.092	2.60951	2.3898e-06	Down
ENSG00000186792	HYAL3	protein_coding	-1.065	2.092	2.092	1.54662	3.1784e-05	Down
ENSG00000170396	ZNF804A	protein_coding	-1.065	2.092	2.092	0.80512	0.00027002	Down
ENSG00000000005	TNMD	protein_coding	-1.066	2.094	2.094	2.07215	1.6681e-05	Down
ENSG00000160818	GPATCH4	protein_coding	-1.068	2.097	2.097	6.25513	2.5308e-9	Down
ENSG00000165644	COMTD1	protein_coding	-1.069	2.098	2.098	4.64448	2.8052e-9	Down
ENSG00000146648	EGFR	protein_coding	-1.071	2.101	2.101	4.79011	2.1422e-9	Down
ENSG00000104356	POP1	protein_coding	-1.075	2.107	2.107	4.78989	4.7807e-10	Down
ENSG00000116133	DHCR24	protein_coding	-1.078	2.11	2.11	8.54564	1.1829e-10	Down
ENSG00000033011	ALG1	protein_coding	-1.081	2.115	2.115	4.83436	1.4128e-8	Down
ENSG00000254721	AP000879.1	lncRNA	-1.083	2.119	2.119	-0.781983	0.021849	Down
ENSG00000203865	ATP1A1-AS1	lncRNA	-1.09	2.129	2.129	2.28122	0.00035721	Down
ENSG00000198886	MT-ND4	protein_coding	-1.093	2.133	2.133	12.1996	7.0506e-7	Down
ENSG00000196152	ZNF79	protein_coding	-1.095	2.136	2.136	2.59354	7.2861e-7	Down
ENSG00000176046	NUPR1	protein_coding	-1.095	2.136	2.136	1.7282	1.4654e-05	Down
ENSG00000079215	SLC1A3	protein_coding	-1.095	2.135	2.135	5.96954	4.7807e-10	Down
ENSG00000260400	AL513534.2	lncRNA	-1.099	2.142	2.142	2.4207	5.2377e-06	Down
ENSG00000160326	SLC2A6	protein_coding	-1.099	2.141	2.141	3.25844	1.1986e-06	Down
ENSG00000167114	SLC27A4	protein_coding	-1.105	2.151	2.151	5.62315	1.4686e-9	Down
ENSG00000115561	CHMP3	protein_coding	-1.111	2.16	2.16	4.3322	1.9776e-9	Down
ENSG00000228060	PABPC4-AS1	lncRNA	-1.116	2.168	2.168	-0.544908	0.03248	Down
ENSG00000160285	LSS	protein_coding	-1.116	2.168	2.168	6.14789	1.8109e-10	Down
ENSG00000213699	SLC35F6	protein_coding	-1.127	2.184	2.184	4.85194	6.2904e-9	Down
ENSG00000260465	AC018557.1	lncRNA	-1.139	2.203	2.203	-0.702206	0.036993	Down
ENSG00000269243	AC008894.2	lncRNA	-1.142	2.207	2.207	-0.545267	0.016595	Down
ENSG00000283375	AC087521.4	lncRNA	-1.143	2.209	2.209	-0.447754	0.046483	Down
ENSG00000274956	NKAIN3-IT1	lncRNA	-1.157	2.23	2.23	-0.982641	0.028579	Down
ENSG00000040531	CTNS	protein_coding	-1.158	2.232	2.232	4.55616	2.8075e-10	Down
ENSG00000124160	NCOA5	protein_coding	-1.161	2.236	2.236	3.90315	1.4292e-8	Down
ENSG00000128165	ADM2	protein_coding	-1.162	2.238	2.238	2.56557	1.3467e-06	Down
ENSG00000147804	SLC39A4	protein_coding	-1.163	2.24	2.24	4.1614	1.3088e-9	Down
ENSG00000198732	SMOC1	protein_coding	-1.163	2.239	2.239	5.6508	3.1341e-10	Down
ENSG00000227751	RCC2-AS1	lncRNA	-1.172	2.254	2.254	-1.10951	0.027139	Down
ENSG00000212123	PRR22	protein_coding	-1.173	2.256	2.256	1.765	5.3749e-06	Down
ENSG00000104783	KCNN4	protein_coding	-1.173	2.255	2.255	-0.556801	0.0018065	Down
ENSG00000182544	MFSD5	protein_coding	-1.183	2.271	2.271	4.19099	1.3441e-8	Down
ENSG00000282034	AC106886.5	protein_coding	-1.188	2.279	2.279	-0.782481	0.014644	Down
ENSG00000265107	GJA5	protein_coding	-1.199	2.296	2.296	-1.09615	0.010473	Down
ENSG00000243989	ACY1	protein_coding	-1.226	2.339	2.339	-0.496206	0.0035286	Down
ENSG00000021645	NRXN3	protein_coding	-1.23	2.345	2.345	4.17264	2.4601e-9	Down
ENSG00000160606	TLCD1	protein_coding	-1.232	2.348	2.348	4.5256	2.1459e-9	Down
ENSG00000284642	AL139424.2	lncRNA	-1.247	2.374	2.374	-0.367877	0.0016906	Down
ENSG00000168918	INPP5D	protein_coding	-1.252	2.382	2.382	2.36542	1.0849e-7	Down
ENSG00000160602	AC010761.1	protein_coding	-1.261	2.397	2.397	3.24138	4.2807e-8	Down
ENSG00000242689	CNTF	protein_coding	-1.263	2.4	2.4	-0.905415	0.013884	Down
ENSG00000267105	AC011511.3	lncRNA	-1.267	2.406	2.406	-1.21618	0.029111	Down
ENSG00000234695	AC002076.1	lncRNA	-1.269	2.41	2.41	-0.969554	0.016992	Down
ENSG00000082482	KCNK2	protein_coding	-1.28	2.428	2.428	0.866416	7.7044e-05	Down
ENSG00000170439	METTL7B	protein_coding	-1.291	2.448	2.448	2.61066	1.6854e-7	Down
ENSG00000103042	SLC38A7	protein_coding	-1.309	2.478	2.478	4.18254	2.6299e-9	Down
ENSG00000250917	AL035458.2	lncRNA	-1.309	2.477	2.477	-0.20052	0.0018015	Down
ENSG00000087589	CASS4	protein_coding	-1.351	2.55	2.55	-0.855873	0.011525	Down
ENSG00000285608	AL161665.1	lncRNA	-1.421	2.677	2.677	-0.82944	0.0086527	Down
ENSG00000172893	DHCR7	protein_coding	-1.423	2.682	2.682	7.02343	5.3563e-11	Down
ENSG00000146453	PNLDC1	protein_coding	-1.426	2.688	2.688	-1.28249	0.0050962	Down
ENSG00000175283	DOLK	protein_coding	-1.43	2.695	2.695	3.94478	5.3662e-10	Down
ENSG00000174327	SLC16A13	protein_coding	-1.44	2.714	2.714	2.29079	2.5667e-7	Down
ENSG00000244694	PTCHD4	protein_coding	-1.466	2.763	2.763	-0.242217	0.00027583	Down
ENSG00000103522	IL21R	protein_coding	-1.467	2.764	2.764	-0.931736	0.0018744	Down
ENSG00000158055	GRHL3	protein_coding	-1.488	2.805	2.805	0.261336	0.00011326	Down
ENSG00000112972	HMGCS1	protein_coding	-1.516	2.859	2.859	6.94749	1.0494e-13	Down
ENSG00000101306	MYLK2	protein_coding	-1.531	2.89	2.89	-0.505809	0.00078841	Down
ENSG00000225255	AP000527.1	lncRNA	-1.544	2.916	2.916	-0.879748	0.0015674	Down
ENSG00000067064	IDI1	protein_coding	-1.575	2.98	2.98	6.8474	2.5022e-13	Down
ENSG00000261604	AC114947.2	lncRNA	-1.59	3.011	3.011	-0.271716	0.0032897	Down
ENSG00000151012	SLC7A11	protein_coding	-1.612	3.057	3.057	5.34739	4.6382e-11	Down
ENSG00000138347	MYPN	protein_coding	-1.672	3.187	3.187	0.882863	1.0586e-06	Down
ENSG00000255959	AP000777.2	lncRNA	-1.692	3.232	3.232	-0.916669	0.0029716	Down
ENSG00000234945	GTF3C2-AS1	lncRNA	-1.694	3.237	3.237	-1.23333	0.0044293	Down
ENSG00000104549	SQLE	protein_coding	-1.699	3.247	3.247	8.23201	9.7112e-13	Down
ENSG00000128965	CHAC1	protein_coding	-1.742	3.344	3.344	2.37178	4.6595e-8	Down
ENSG00000130164	LDLR	protein_coding	-1.771	3.412	3.412	5.46627	6.0579e-13	Down
ENSG00000258429	PDF	protein_coding	-1.802	3.486	3.486	0.478126	7.6806e-06	Down
ENSG00000198763	MT-ND2	protein_coding	-1.847	3.597	3.597	9.92472	5.9168e-10	Down
ENSG00000272711	AC019069.1	lncRNA	-1.892	3.71	3.71	1.38095	4.6132e-06	Down
ENSG00000170324	FRMPD2	protein_coding	-1.913	3.765	3.765	-0.971161	0.00014521	Down
ENSG00000162595	DIRAS3	protein_coding	-2.019	4.052	4.052	0.0700829	8.5748e-05	Down
ENSG00000196517	SLC6A9	protein_coding	-2.075	4.213	4.213	3.86248	7.6503e-12	Down
ENSG00000245025	AC107959.1	lncRNA	-2.091	4.26	4.26	-1.17105	0.00052559	Down
ENSG00000198840	MT-ND3	protein_coding	-2.187	4.554	4.554	9.34932	1.0375e-10	Down
ENSG00000186529	CYP4F3	protein_coding	-2.229	4.688	4.688	-0.629107	1.3803e-05	Down
ENSG00000198938	MT-CO3	protein_coding	-2.348	5.092	5.092	11.8876	2.372e-11	Down
ENSG00000141579	ZNF750	protein_coding	-2.383	5.215	5.215	-1.18716	6.2883e-05	Down
ENSG00000205592	MUC19	protein_coding	-2.386	5.226	5.226	-0.369804	1.7351e-05	Down
ENSG00000198695	MT-ND6	protein_coding	-2.392	5.247	5.247	5.64151	8.8335e-11	Down
ENSG00000198712	MT-CO2	protein_coding	-2.42	5.351	5.351	12.428	1.6196e-11	Down
ENSG00000198727	MT-CYB	protein_coding	-2.445	5.447	5.447	10.3055	1.3185e-11	Down
ENSG00000198899	MT-ATP6	protein_coding	-2.707	6.529	6.529	11.1671	1.2304e-12	Down
ENSG00000228253	MT-ATP8	protein_coding	-2.887	7.397	7.397	8.17923	6.0337e-13	Down
ENSG00000144452	ABCA12	protein_coding	-2.935	7.646	7.646	-0.517359	8.3742e-06	Down
ENSG00000187775	DNAH17	protein_coding	-3.361	10.275	10	1.44988	5.3563e-11	Down
ENSG00000186115	CYP4F2	protein_coding	-3.546	11.678	10	-0.919923	3.0327e-06	Down
